# Supplementary material for: Global, regional and national burdens of bipolar disorders in adolescents and young adults: a trend analysis from 1990 to 2019
Source: PubMed Central journal article supplement — Gen Psychiatr. 2024 Feb 21;37(1):e101255. doi: 10.1136/gpsych-2023-101255 (PMC10882284; doi:10.1136/gpsych-2023-101255), 2024-02-21
Supplement: gpsych-2023-101255supp001.pdf [file gpsych-2023-101255supp001.pdf]

## Appendix

|                                                                                                                                                                                                                   |           |
|-------------------------------------------------------------------------------------------------------------------------------------------------------------------------------------------------------------------|-----------|
| <b>Supplement table S1: The incidence of bipolar disorder aged 10-24 years and its average annual percentage change (AAPC) from 1990 to 2019 at the global and regional levels .....</b>                          | <b>2</b>  |
| <b>Supplement table S2: The prevalence of bipolar disorder aged 10-24 years and its average annual percentage change (AAPC) from 1990 to 2019 at the global and regional levels .....</b>                         | <b>11</b> |
| <b>Supplement table S3: The years lived with disability (YLDs) of bipolar disorder aged 10-24 years and its average annual percentage change (AAPC) from 1990 to 2019 at the global and regional levels .....</b> | <b>20</b> |
| <b>Supplement table S4: The incidence of bipolar disorder aged 10-24 years and its average annual percentage change (AAPC) from 1990 to 2019 at 204 countries levels .....</b>                                    | <b>30</b> |
| <b>Supplement table S5: The years lived with disability (YLDs) of bipolar disorder aged 10-24 years and its average annual percentage change (AAPC) from 1990 to 2019 at 204 countries level .....</b>            | <b>53</b> |
| <b>Supplement table S6: The prevalence of bipolar disorder aged 10-24 years and its average annual percentage change (AAPC) from 1990 to 2019 at 204 countries levels .....</b>                                   | <b>76</b> |

## Appendix

**Supplement table S1: The incidence of bipolar disorder aged 10-24 years and its average annual percentage change (AAPC) from 1990 to 2019 at the global and regional levels**

| Location                   | Sex    | 1990                          |                                 | 2019                           |                                 | AAPC<br>(95% CI)  |
|----------------------------|--------|-------------------------------|---------------------------------|--------------------------------|---------------------------------|-------------------|
|                            |        | Case (95% UI)                 | Rate (per 100000<br>population) | Case (95% UI)                  | Rate (per 100000<br>population) |                   |
| <b>Global</b>              | Both   | 1226881<br>(900359 - 1628735) | 79.21<br>(58.13 - 105.15)       | 1582095<br>(1149314 - 2112550) | 84.97<br>(61.73 - 113.46)       | 0.24(0.22 - 0.26) |
|                            | Female | 620163<br>(456045 - 822086)   | 81.41<br>(59.86 - 107.91)       | 790028<br>(572631 - 1055254)   | 86.97<br>(63.04 - 116.17)       | 0.23(0.22 - 0.24) |
|                            | Male   | 606719<br>(445742 - 800643)   | 77.08<br>(56.63 - 101.71)       | 792066<br>(577305 - 1057194)   | 83.07<br>(60.55 - 110.88)       | 0.26(0.25 - 0.27) |
| <b>High SDI</b>            | Both   | 209893<br>(165469 - 261497)   | 114.47<br>(90.24 - 142.61)      | 211156<br>(168739 - 260925)    | 120.29<br>(96.13 - 148.64)      | 0.17(0.16 - 0.19) |
|                            | Female | 98332<br>(76328 - 124026)     | 110.04<br>(85.41 - 138.79)      | 97640<br>(77209 - 122136)      | 114.98<br>(90.92 - 143.82)      | 0.16(0.14 - 0.17) |
|                            | Male   | 111561<br>(88258 - 136950)    | 118.68<br>(93.89 - 145.69)      | 113515<br>(91074 - 138775)     | 125.27<br>(100.51 - 153.15)     | 0.19(0.15 - 0.22) |
| <b>High-middle<br/>SDI</b> | Both   | 230693<br>(168282 - 308110)   | 76.24<br>(55.61 - 101.82)       | 208512<br>(151234 - 280006)    | 82.17<br>(59.6 - 110.35)        | 0.26(0.23 - 0.29) |
|                            | Female | 119589<br>(87368 - 159659)    | 80.56<br>(58.86 - 107.55)       | 105444<br>(77028 - 141407)     | 86.69<br>(63.33 - 116.26)       | 0.25(0.22 - 0.28) |

|                             |        |                             |                             |                             |                             |                      |
|-----------------------------|--------|-----------------------------|-----------------------------|-----------------------------|-----------------------------|----------------------|
|                             | Male   | 111104<br>(80456 - 148063)  | 72.07<br>(52.19 - 96.05)    | 103068<br>(74315 - 138327)  | 78.01<br>(56.25 - 104.7)    | 0.27(0.23 - 0.31)    |
| <b>Middle SDI</b>           | Both   | 377077<br>(276368 - 500533) | 69.26<br>(50.76 - 91.94)    | 427754<br>(310077 - 572955) | 77.84<br>(56.43 - 104.26)   | 0.41(0.38 - 0.43)    |
|                             | Female | 197377<br>(144710 - 260664) | 73.57<br>(53.94 - 97.17)    | 219398<br>(159545 - 292192) | 82.47<br>(59.97 - 109.83)   | 0.4(0.37 - 0.42)     |
|                             | Male   | 179699<br>(130412 - 240055) | 65.07<br>(47.23 - 86.93)    | 208356<br>(150016 - 280723) | 73.5<br>(52.92 - 99.02)     | 0.43(0.41 - 0.44)    |
| <b>Low-middle SDI</b>       | Both   | 258347<br>(185392 - 345945) | 73<br>(52.39 - 97.76)       | 387654<br>(276860 - 523199) | 75.95<br>(54.24 - 102.5)    | 0.14(0.13 - 0.14)    |
|                             | Female | 128734<br>(92778 - 172398)  | 73.9<br>(53.26 - 98.97)     | 191971<br>(137329 - 258279) | 76.55<br>(54.76 - 102.99)   | 0.12(0.12 - 0.12)    |
|                             | Male   | 129614<br>(92977 - 174324)  | 72.13<br>(51.74 - 97.01)    | 195683<br>(139305 - 265436) | 75.36<br>(53.65 - 102.23)   | 0.15(0.14 - 0.16)    |
| <b>Low SDI</b>              | Both   | 149912<br>(104195 - 206396) | 91.49<br>(63.59 - 125.97)   | 345780<br>(240329 - 478670) | 93.08<br>(64.69 - 128.85)   | 0.06(0.06 - 0.06)    |
|                             | Female | 75614<br>(52398 - 104629)   | 93.22<br>(64.6 - 128.99)    | 174918<br>(120948 - 241912) | 94.82<br>(65.57 - 131.14)   | 0.06(0.06 - 0.06)    |
|                             | Male   | 74298<br>(51557 - 102860)   | 89.8<br>(62.32 - 124.33)    | 170861<br>(118611 - 237747) | 91.36<br>(63.42 - 127.12)   | 0.06(0.06 - 0.06)    |
| <b>Andean Latin America</b> | Both   | 19752<br>(13204 - 28210)    | 160.58<br>(107.34 - 229.34) | 26579<br>(17670 - 37660)    | 157.91<br>(104.98 - 223.74) | -0.06(-0.06 - -0.05) |

|                     |        |                          |                             |                          |                             |                      |
|---------------------|--------|--------------------------|-----------------------------|--------------------------|-----------------------------|----------------------|
|                     | Female | 10754<br>(7196 - 15128)  | 173.88<br>(116.36 - 244.62) | 13998<br>(9388 - 19811)  | 171.5<br>(115.01 - 242.71)  | -0.05(-0.05 - -0.04) |
|                     | Male   | 8998<br>(5907 - 12872)   | 147.12<br>(96.57 - 210.45)  | 12581<br>(8284 - 17988)  | 145.11<br>(95.55 - 207.48)  | -0.05(-0.05 - -0.04) |
| <b>Australasia</b>  | Both   | 10598<br>(7904 - 13622)  | 220.25<br>(164.27 - 283.08) | 11936<br>(8847 - 15205)  | 219.97<br>(163.06 - 280.24) | 0(-0.02 - 0.03)      |
|                     | Female | 4597<br>(3437 - 5850)    | 194.56<br>(145.45 - 247.6)  | 5050<br>(3780 - 6424)    | 190.3<br>(142.44 - 242.07)  | -0.08(-0.11 - -0.05) |
|                     | Male   | 6001<br>(4395 - 7857)    | 245.03<br>(179.47 - 320.8)  | 6885<br>(5012 - 8904)    | 248.38<br>(180.81 - 321.19) | 0.05(0.02 - 0.08)    |
| <b>Caribbean</b>    | Both   | 17031<br>(11320 - 24205) | 159.93<br>(106.3 - 227.3)   | 18263<br>(12101 - 25850) | 159.43<br>(105.64 - 225.66) | -0.01(-0.03 - 0.01)  |
|                     | Female | 9313<br>(6277 - 13123)   | 173.83<br>(117.16 - 244.94) | 9859<br>(6600 - 13860)   | 173.62<br>(116.22 - 244.07) | 0(-0.02 - 0.01)      |
|                     | Male   | 7718<br>(5066 - 11075)   | 145.85<br>(95.73 - 209.28)  | 8404<br>(5475 - 12104)   | 145.49<br>(94.78 - 209.54)  | -0.01(-0.02 - 0.01)  |
| <b>Central Asia</b> | Both   | 16301<br>(10879 - 23633) | 82.17<br>(54.84 - 119.13)   | 18362<br>(12192 - 26596) | 81.2<br>(53.92 - 117.61)    | -0.04(-0.05 - -0.03) |
|                     | Female | 8304<br>(5542 - 11970)   | 84.44<br>(56.35 - 121.72)   | 9200<br>(6157 - 13366)   | 83.59<br>(55.94 - 121.43)   | -0.04(-0.05 - -0.02) |
|                     | Male   | 7997<br>(5293 - 11768)   | 79.95<br>(52.92 - 117.65)   | 9161<br>(6076 - 13389)   | 78.93<br>(52.35 - 115.36)   | -0.05(-0.05 - -0.04) |

|                                   |        |                            |                             |                           |                             |                      |
|-----------------------------------|--------|----------------------------|-----------------------------|---------------------------|-----------------------------|----------------------|
| <b>Central Europe</b>             | Both   | 24689<br>(17299 - 33435)   | 86<br>(60.26 - 116.47)      | 15238<br>(10660 - 20673)  | 84.76<br>(59.29 - 114.99)   | -0.05(-0.06 - -0.05) |
|                                   | Female | 12759<br>(8968 - 17310)    | 90.79<br>(63.81 - 123.16)   | 7805<br>(5464 - 10682)    | 89.4<br>(62.58 - 122.36)    | -0.05(-0.06 - -0.05) |
|                                   | Male   | 11930<br>(8317 - 16314)    | 81.41<br>(56.76 - 111.33)   | 7434<br>(5195 - 10182)    | 80.38<br>(56.18 - 110.1)    | -0.04(-0.05 - -0.04) |
| <b>Central Latin America</b>      | Both   | 82800<br>(61296 - 108457)  | 153.02<br>(113.28 - 200.44) | 98993<br>(72198 - 131149) | 150.45<br>(109.73 - 199.32) | -0.06(-0.06 - -0.06) |
|                                   | Female | 45870<br>(33859 - 59528)   | 167.58<br>(123.7 - 217.47)  | 53872<br>(39574 - 70706)  | 165.02<br>(121.22 - 216.58) | -0.05(-0.06 - -0.05) |
|                                   | Male   | 36931<br>(26920 - 48943)   | 138.12<br>(100.68 - 183.05) | 45121<br>(32582 - 60479)  | 136.11<br>(98.28 - 182.43)  | -0.05(-0.05 - -0.05) |
| <b>Central Sub-Saharan Africa</b> | Both   | 17314<br>(11418 - 25219)   | 100<br>(65.95 - 145.65)     | 42991<br>(28324 - 62786)  | 100.03<br>(65.9 - 146.09)   | 0(0 - 0)             |
|                                   | Female | 8732<br>(5666 - 12813)     | 101.15<br>(65.63 - 148.42)  | 21761<br>(14159 - 31981)  | 101.19<br>(65.84 - 148.71)  | 0(0 - 0)             |
|                                   | Male   | 8581<br>(5651 - 12458)     | 98.85<br>(65.09 - 143.51)   | 21230<br>(13985 - 30786)  | 98.86<br>(65.13 - 143.36)   | 0(0 - 0)             |
| <b>East Asia</b>                  | Both   | 100777<br>(73483 - 132600) | 27<br>(19.68 - 35.52)       | 64302<br>(47127 - 84342)  | 27.14<br>(19.89 - 35.6)     | 0.02(-0.01 - 0.05)   |

|                                   |        |                          |                            |                             |                            |                      |
|-----------------------------------|--------|--------------------------|----------------------------|-----------------------------|----------------------------|----------------------|
|                                   | Female | 51284<br>(37612 - 67413) | 28.19<br>(20.68 - 37.06)   | 31222<br>(23060 - 40934)    | 28.14<br>(20.78 - 36.89)   | 0(-0.03 - 0.03)      |
|                                   | Male   | 49493<br>(36115 - 65051) | 25.86<br>(18.87 - 33.99)   | 33079<br>(24250 - 43549)    | 26.26<br>(19.25 - 34.57)   | 0.05(0.02 - 0.09)    |
| <b>Eastern Europe</b>             | Both   | 38839<br>(28386 - 51137) | 82.16<br>(60.05 - 108.18)  | 26375<br>(19373 - 34646)    | 81.59<br>(59.93 - 107.17)  | -0.03(-0.04 - -0.01) |
|                                   | Female | 19463<br>(14212 - 25425) | 83.62<br>(61.06 - 109.24)  | 13106<br>(9607 - 17099)     | 83.11<br>(60.92 - 108.43)  | -0.02(-0.04 - -0.01) |
|                                   | Male   | 19376<br>(14174 - 25823) | 80.74<br>(59.07 - 107.61)  | 13269<br>(9745 - 17632)     | 80.14<br>(58.86 - 106.49)  | -0.03(-0.04 - -0.01) |
| <b>Eastern Sub-Saharan Africa</b> | Both   | 67105<br>(46451 - 92676) | 108.56<br>(75.14 - 149.92) | 151995<br>(105077 - 209936) | 108.81<br>(75.22 - 150.29) | 0.01(0.01 - 0.01)    |
|                                   | Female | 34465<br>(23860 - 47529) | 110.35<br>(76.39 - 152.17) | 77381<br>(53390 - 106674)   | 110.58<br>(76.29 - 152.44) | 0.01(0.01 - 0.01)    |
|                                   | Male   | 32641<br>(22640 - 45486) | 106.73<br>(74.03 - 148.73) | 74614<br>(51850 - 103837)   | 107.04<br>(74.38 - 148.96) | 0.01(0.01 - 0.01)    |
| <b>High-income Asia Pacific</b>   | Both   | 40589<br>(29777 - 52907) | 96.27<br>(70.63 - 125.49)  | 25127<br>(18416 - 32969)    | 93.29<br>(68.37 - 122.4)   | -0.11(-0.14 - -0.07) |

|                                             |        |                             |                             |                             |                            |                      |
|---------------------------------------------|--------|-----------------------------|-----------------------------|-----------------------------|----------------------------|----------------------|
|                                             | Female | 18361<br>(13550 - 24236)    | 89.42<br>(65.99 - 118.03)   | 11176<br>(8190 - 14818)     | 85.75<br>(62.83 - 113.69)  | -0.15(-0.17 - -0.12) |
|                                             | Male   | 22228<br>(16240 - 29144)    | 102.78<br>(75.1 - 134.76)   | 13950<br>(10231 - 18147)    | 100.36<br>(73.6 - 130.55)  | -0.08(-0.11 - -0.05) |
| <b>High-income<br/>North<br/>America</b>    | Both   | 73781<br>(63826 - 83739)    | 121.04<br>(104.71 - 137.38) | 88219<br>(76492 - 100074)   | 124.3<br>(107.78 - 141.01) | 0.09(0.07 - 0.12)    |
|                                             | Female | 28988<br>(25261 - 33134)    | 97.27<br>(84.77 - 111.19)   | 35021<br>(30453 - 40115)    | 100.9<br>(87.74 - 115.57)  | 0.13(0.1 - 0.16)     |
|                                             | Male   | 44794<br>(38348 - 50722)    | 143.78<br>(123.09 - 162.81) | 53198<br>(45779 - 60082)    | 146.71<br>(126.25 - 165.7) | 0.07(0.03 - 0.11)    |
| <b>North Africa<br/>and Middle<br/>East</b> | Both   | 149376<br>(103946 - 207175) | 135.26<br>(94.12 - 187.59)  | 213805<br>(146387 - 299933) | 132.57<br>(90.76 - 185.97) | -0.07(-0.08 - -0.06) |
|                                             | Female | 82666<br>(57265 - 114027)   | 153.38<br>(106.25 - 211.56) | 117046<br>(80662 - 163356)  | 150.03<br>(103.4 - 209.4)  | -0.08(-0.09 - -0.07) |
|                                             | Male   | 66710<br>(45469 - 92851)    | 117.99<br>(80.42 - 164.22)  | 96759<br>(65573 - 135443)   | 116.2<br>(78.75 - 162.66)  | -0.05(-0.06 - -0.05) |
| <b>Oceania</b>                              | Both   | 898<br>(574 - 1333)         | 43.34<br>(27.72 - 64.33)    | 1689<br>(1074 - 2532)       | 43.34<br>(27.54 - 64.96)   | 0(0 - 0)             |

|                               |        |                             |                            |                             |                             |                   |
|-------------------------------|--------|-----------------------------|----------------------------|-----------------------------|-----------------------------|-------------------|
|                               | Female | 437<br>(279 - 640)          | 43.75<br>(27.92 - 64.14)   | 814<br>(524 - 1192)         | 43.74<br>(28.17 - 64.09)    | 0(0 - 0)          |
|                               | Male   | 461<br>(293 - 683)          | 42.95<br>(27.31 - 63.62)   | 875<br>(557 - 1299)         | 42.96<br>(27.34 - 63.75)    | 0(0 - 0)          |
| <b>South Asia</b>             | Both   | 188252<br>(137934 - 249820) | 56.2<br>(41.18 - 74.59)    | 296877<br>(216283 - 392929) | 56.46<br>(41.13 - 74.73)    | 0.02(0.01 - 0.02) |
|                               | Female | 85055<br>(62246 - 113173)   | 52.63<br>(38.52 - 70.03)   | 134576<br>(98386 - 178127)  | 52.87<br>(38.65 - 69.98)    | 0.02(0.01 - 0.02) |
|                               | Male   | 103197<br>(75361 - 136743)  | 59.54<br>(43.48 - 78.89)   | 162301<br>(117751 - 215078) | 59.83<br>(43.41 - 79.29)    | 0.02(0.01 - 0.02) |
| <b>Southeast Asia</b>         | Both   | 76399<br>(53799 - 104371)   | 51.57<br>(36.31 - 70.44)   | 87596<br>(61896 - 120056)   | 51.57<br>(36.44 - 70.68)    | 0(0 - 0)          |
|                               | Female | 38519<br>(27149 - 52785)    | 52<br>(36.65 - 71.26)      | 43384<br>(30526 - 59618)    | 52.07<br>(36.64 - 71.55)    | 0(0 - 0.01)       |
|                               | Male   | 37879<br>(26781 - 51923)    | 51.13<br>(36.15 - 70.08)   | 44212<br>(31390 - 60408)    | 51.1<br>(36.28 - 69.81)     | 0(0 - 0)          |
| <b>Southern Latin America</b> | Both   | 22052<br>(14935 - 31277)    | 166.56<br>(112.8 - 236.23) | 26611<br>(17849 - 37596)    | 174.97<br>(117.35 - 247.19) | 0.17(0.15 - 0.18) |

|                                            |        |                            |                             |                            |                             |                      |
|--------------------------------------------|--------|----------------------------|-----------------------------|----------------------------|-----------------------------|----------------------|
|                                            | Female | 10175<br>(6851 - 14187)    | 153.8<br>(103.55 - 214.44)  | 11615<br>(7764 - 16436)    | 154.65<br>(103.37 - 218.83) | 0.02(0 - 0.03)       |
|                                            | Male   | 11877<br>(7886 - 17300)    | 179.31<br>(119.05 - 261.17) | 14996<br>(10055 - 21072)   | 194.79<br>(130.6 - 273.72)  | 0.28(0.26 - 0.3)     |
| <b>Southern<br/>Sub-Saharan<br/>Africa</b> | Both   | 17471<br>(12663 - 23640)   | 100.91<br>(73.14 - 136.54)  | 21391<br>(15404 - 29167)   | 100.32<br>(72.24 - 136.79)  | -0.02(-0.02 - -0.02) |
|                                            | Female | 9078<br>(6573 - 12406)     | 102.16<br>(73.97 - 139.61)  | 10765<br>(7781 - 14883)    | 101.52<br>(73.38 - 140.36)  | -0.02(-0.03 - -0.02) |
|                                            | Male   | 8393<br>(6080 - 11232)     | 99.59<br>(72.15 - 133.28)   | 10627<br>(7604 - 14331)    | 99.14<br>(70.94 - 133.69)   | -0.01(-0.02 - -0.01) |
| <b>Tropical<br/>Latin<br/>America</b>      | Both   | 101372<br>(77129 - 129456) | 212.03<br>(161.32 - 270.77) | 107680<br>(81704 - 137663) | 206.34<br>(156.57 - 263.8)  | -0.1(-0.1 - -0.09)   |
|                                            | Female | 54031<br>(40999 - 68713)   | 225.22<br>(170.9 - 286.42)  | 56495<br>(42651 - 71817)   | 219.23<br>(165.51 - 278.68) | -0.1(-0.1 - -0.09)   |
|                                            | Male   | 47341<br>(35890 - 60700)   | 198.74<br>(150.67 - 254.82) | 51184<br>(38515 - 65703)   | 193.78<br>(145.81 - 248.74) | -0.09(-0.1 - -0.08)  |
| <b>Western<br/>Europe</b>                  | Both   | 104846<br>(76512 - 139804) | 127.59<br>(93.11 - 170.13)  | 94590<br>(69891 - 124761)  | 132.14<br>(97.64 - 174.29)  | 0.12(0.11 - 0.14)    |

|                                   |        |                          |                             |                             |                             |                   |
|-----------------------------------|--------|--------------------------|-----------------------------|-----------------------------|-----------------------------|-------------------|
|                                   | Female | 57562<br>(41953 - 75904) | 143.05<br>(104.26 - 188.63) | 51543<br>(38208 - 67684)    | 148.45<br>(110.05 - 194.94) | 0.13(0.11 - 0.15) |
|                                   | Male   | 47284<br>(34681 - 62246) | 112.75<br>(82.7 - 148.43)   | 43047<br>(31493 - 56563)    | 116.78<br>(85.43 - 153.45)  | 0.12(0.1 - 0.14)  |
| <b>Western Sub-Saharan Africa</b> | Both   | 56638<br>(39745 - 77957) | 95.06<br>(66.7 - 130.84)    | 143474<br>(100719 - 196783) | 95.13<br>(66.78 - 130.48)   | 0(0 - 0)          |
|                                   | Female | 29750<br>(20880 - 40731) | 96.13<br>(67.47 - 131.61)   | 74337<br>(52246 - 101520)   | 96.3<br>(67.68 - 131.51)    | 0(0 - 0.01)       |
|                                   | Male   | 26888<br>(18872 - 37080) | 93.9<br>(65.91 - 129.49)    | 69137<br>(48536 - 95169)    | 93.91<br>(65.93 - 129.27)   | 0(0 - 0)          |

**Supplement table S2: The prevalence of bipolar disorder aged 10-24 years and its average annual percentage change (AAPC) from 1990 to 2019 at the global and regional levels**

| Location        | Sex    | 1990                           |                              | 2019                            |                              | AAPC<br>(95% CI)  |
|-----------------|--------|--------------------------------|------------------------------|---------------------------------|------------------------------|-------------------|
|                 |        | Case (95% UI)                  | Rate (per 100000 population) | Case (95% UI)                   | Rate (per 100000 population) |                   |
| Global          | Both   | 7022430<br>(5097382 - 9329749) | 453.36<br>(329.08 - 602.32)  | 8962431<br>(6442959 - 12010590) | 481.37<br>(346.05 - 645.08)  | 0.21(0.2 - 0.21)  |
|                 | Female | 3627801<br>(2623542 - 4830247) | 476.21<br>(344.38 - 634.05)  | 4564213<br>(3271471 - 6112349)  | 502.45<br>(360.14 - 672.88)  | 0.18(0.18 - 0.19) |
|                 | Male   | 3394629<br>(2463298 - 4514260) | 431.25<br>(312.94 - 573.49)  | 4398218<br>(3161192 - 5888487)  | 461.28<br>(331.54 - 617.58)  | 0.23(0.22 - 0.24) |
| High SDI        | Both   | 1425417<br>(1127039 - 1781615) | 777.39<br>(614.66 - 971.65)  | 1395692<br>(1117645 - 1719892)  | 795.09<br>(636.7 - 979.78)   | 0.08(0.07 - 0.09) |
|                 | Female | 700354<br>(544786 - 883203)    | 783.73<br>(609.64 - 988.34)  | 677797<br>(535050 - 842237)     | 798.14<br>(630.05 - 991.78)  | 0.06(0.05 - 0.08) |
|                 | Male   | 725063<br>(576611 - 901131)    | 771.36<br>(613.43 - 958.68)  | 717895<br>(577650 - 879752)     | 792.24<br>(637.47 - 970.85)  | 0.09(0.08 - 0.11) |
| High-middle SDI | Both   | 1390024<br>(996422 - 1871605)  | 459.36<br>(329.28 - 618.5)   | 1296300<br>(925022 - 1740445)   | 510.86<br>(364.54 - 685.89)  | 0.37(0.34 - 0.39) |
|                 | Female | 737005<br>(530050 - 997530)    | 496.48<br>(357.07 - 671.98)  | 670321<br>(478469 - 905423)     | 551.11<br>(393.38 - 744.4)   | 0.36(0.34 - 0.38) |
|                 | Male   | 653020<br>(464885 - 881399)    | 423.6<br>(301.56 - 571.75)   | 625979<br>(444461 - 837402)     | 473.8<br>(336.41 - 633.82)   | 0.39(0.36 - 0.41) |

|                             |        |                                |                              |                                |                               |                   |
|-----------------------------|--------|--------------------------------|------------------------------|--------------------------------|-------------------------------|-------------------|
| <b>Middle SDI</b>           | Both   | 2124769<br>(1530755 - 2840597) | 390.29<br>(281.18 - 521.77)  | 2463114<br>(1774157 - 3300970) | 448.22<br>(322.85 - 600.68)   | 0.48(0.46 - 0.5)  |
|                             | Female | 1134350<br>(819287 - 1509690)  | 422.84<br>(305.4 - 562.75)   | 1292745<br>(930944 - 1726152)  | 485.92<br>(349.92 - 648.82)   | 0.48(0.46 - 0.5)  |
|                             | Male   | 990419<br>(707818 - 1328575)   | 358.66<br>(256.32 - 481.12)  | 1170369<br>(837129 - 1569553)  | 412.84<br>(295.29 - 553.65)   | 0.49(0.47 - 0.5)  |
| <b>Low-middle SDI</b>       | Both   | 1343609<br>(940719 - 1828202)  | 379.67<br>(265.83 - 516.61)  | 2086165<br>(1463310 - 2834895) | 408.71<br>(286.68 - 555.4)    | 0.25(0.23 - 0.27) |
|                             | Female | 679931<br>(474230 - 921024)    | 390.33<br>(272.24 - 528.73)  | 1047154<br>(729913 - 1420955)  | 417.58<br>(291.07 - 566.64)   | 0.23(0.21 - 0.25) |
|                             | Male   | 663678<br>(466401 - 907179)    | 369.34<br>(259.56 - 504.86)  | 1039011<br>(732580 - 1414420)  | 400.15<br>(282.13 - 544.73)   | 0.27(0.26 - 0.29) |
| <b>Low SDI</b>              | Both   | 732993<br>(494280 - 1025119)   | 447.36<br>(301.67 - 625.65)  | 1714006<br>(1148918 - 2404706) | 461.39<br>(309.28 - 647.32)   | 0.11(0.1 - 0.12)  |
|                             | Female | 373082<br>(250210 - 522221)    | 459.93<br>(308.46 - 643.79)  | 872337<br>(582853 - 1225387)   | 472.9<br>(315.97 - 664.29)    | 0.1(0.09 - 0.1)   |
|                             | Male   | 359911<br>(243055 - 506706)    | 435.03<br>(293.78 - 612.46)  | 841669<br>(565709 - 1187710)   | 450.04<br>(302.49 - 635.07)   | 0.12(0.11 - 0.13) |
| <b>Andean Latin America</b> | Both   | 109398<br>(69731 - 159672)     | 889.37<br>(566.89 - 1298.09) | 155731<br>(100738 - 225620)    | 925.19<br>(598.48 - 1340.4)   | 0.14(0.13 - 0.14) |
|                             | Female | 60461<br>(38659 - 87827)       | 977.63<br>(625.1 - 1420.14)  | 83009<br>(53779 - 120581)      | 1016.97<br>(658.87 - 1477.28) | 0.14(0.13 - 0.15) |

|                     |        |                            |                               |                            |                                |                      |
|---------------------|--------|----------------------------|-------------------------------|----------------------------|--------------------------------|----------------------|
|                     | Male   | 48937<br>(31040 - 71731)   | 800.13<br>(507.51 - 1172.81)  | 72722<br>(45973 - 105829)  | 838.78<br>(530.25 - 1220.64)   | 0.16(0.16 - 0.17)    |
| <b>Australasia</b>  | Both   | 68799<br>(50785 - 89049)   | 1429.76<br>(1055.4 - 1850.6)  | 76907<br>(56303 - 100212)  | 1417.41<br>(1037.67 - 1846.94) | -0.03(-0.05 - -0.01) |
|                     | Female | 31362<br>(23266 - 40681)   | 1327.36<br>(984.71 - 1721.75) | 34453<br>(25390 - 44558)   | 1298.3<br>(956.77 - 1679.08)   | -0.08(-0.1 - -0.06)  |
|                     | Male   | 37437<br>(27532 - 49044)   | 1528.55<br>(1124.14 - 2002.5) | 42453<br>(31388 - 55720)   | 1531.43<br>(1132.29 - 2010.02) | 0(-0.04 - 0.04)      |
| <b>Caribbean</b>    | Both   | 101165<br>(65305 - 146504) | 949.97<br>(613.24 - 1375.72)  | 107615<br>(69309 - 156011) | 939.44<br>(605.04 - 1361.92)   | -0.04(-0.06 - -0.01) |
|                     | Female | 56303<br>(36437 - 81052)   | 1050.93<br>(680.12 - 1512.88) | 58949<br>(38276 - 84571)   | 1038.09<br>(674.04 - 1489.3)   | -0.04(-0.07 - -0.01) |
|                     | Male   | 44862<br>(28722 - 64952)   | 847.76<br>(542.75 - 1227.4)   | 48666<br>(31092 - 71448)   | 842.46<br>(538.24 - 1236.85)   | -0.02(-0.04 - 0.01)  |
| <b>Central Asia</b> | Both   | 89481<br>(56409 - 130601)  | 451.07<br>(284.36 - 658.36)   | 103870<br>(65681 - 151967) | 459.33<br>(290.45 - 672.02)    | 0.06(0.01 - 0.11)    |
|                     | Female | 46454<br>(29172 - 67541)   | 472.34<br>(296.63 - 686.76)   | 52956<br>(33299 - 77167)   | 481.12<br>(302.53 - 701.08)    | 0.06(0.01 - 0.12)    |

|                                   |        |                             |                              |                             |                             |                      |
|-----------------------------------|--------|-----------------------------|------------------------------|-----------------------------|-----------------------------|----------------------|
|                                   | Male   | 43028<br>(27168 - 63435)    | 430.16<br>(271.61 - 634.18)  | 50914<br>(32179 - 74570)    | 438.66<br>(277.25 - 642.49) | 0.06(0.01 - 0.12)    |
| <b>Central Europe</b>             | Both   | 141320<br>(96267 - 195000)  | 492.27<br>(335.33 - 679.26)  | 90974<br>(62350 - 124795)   | 506.03<br>(346.81 - 694.15) | 0.09(0.04 - 0.15)    |
|                                   | Female | 74444<br>(51011 - 102514)   | 529.68<br>(362.95 - 729.41)  | 47546<br>(32642 - 65088)    | 544.62<br>(373.89 - 745.55) | 0.1(0.05 - 0.14)     |
|                                   | Male   | 66876<br>(45111 - 93736)    | 456.38<br>(307.85 - 639.68)  | 43427<br>(29464 - 60548)    | 469.6<br>(318.6 - 654.73)   | 0.09(0.04 - 0.15)    |
| <b>Central Latin America</b>      | Both   | 462801<br>(335718 - 620150) | 855.29<br>(620.43 - 1146.09) | 583524<br>(420312 - 778865) | 886.85<br>(638.8 - 1183.73) | 0.13(0.12 - 0.14)    |
|                                   | Female | 264050<br>(194022 - 349333) | 964.66<br>(708.82 - 1276.22) | 326461<br>(238039 - 432615) | 1000<br>(729.15 - 1325.16)  | 0.12(0.12 - 0.14)    |
|                                   | Male   | 198751<br>(143444 - 267568) | 743.33<br>(536.48 - 1000.71) | 257063<br>(184499 - 346596) | 775.42<br>(556.54 - 1045.5) | 0.15(0.14 - 0.16)    |
| <b>Central Sub-Saharan Africa</b> | Both   | 85670<br>(53604 - 126458)   | 494.8<br>(309.6 - 730.38)    | 211830<br>(132671 - 312934) | 492.87<br>(308.69 - 728.11) | -0.01(-0.02 - -0.01) |
|                                   | Female | 43388<br>(26999 - 64093)    | 502.59<br>(312.74 - 742.43)  | 107685<br>(67081 - 159248)  | 500.74<br>(311.93 - 740.52) | -0.01(-0.02 - 0)     |

|                                   |        |                             |                             |                              |                             |                      |
|-----------------------------------|--------|-----------------------------|-----------------------------|------------------------------|-----------------------------|----------------------|
|                                   | Male   | 42281<br>(26574 - 62327)    | 487.05<br>(306.11 - 717.96) | 104145<br>(65303 - 153633)   | 484.98<br>(304.1 - 715.44)  | -0.01(-0.02 - -0.01) |
| <b>East Asia</b>                  | Both   | 641307<br>(468662 - 841452) | 171.79<br>(125.55 - 225.41) | 400274<br>(291940 - 525556)  | 168.94<br>(123.22 - 221.82) | -0.08(-0.17 - 0.01)  |
|                                   | Female | 329003<br>(239757 - 432676) | 180.86<br>(131.8 - 237.84)  | 197487<br>(143794 - 259671)  | 177.96<br>(129.58 - 234)    | -0.07(-0.16 - 0.01)  |
|                                   | Male   | 312304<br>(227205 - 407981) | 163.18<br>(118.72 - 213.17) | 202786<br>(147465 - 265594)  | 161<br>(117.08 - 210.86)    | -0.07(-0.17 - 0.02)  |
| <b>Eastern Europe</b>             | Both   | 212047<br>(153986 - 278153) | 448.58<br>(325.76 - 588.43) | 143572<br>(104478 - 188157)  | 444.12<br>(323.19 - 582.04) | -0.04(-0.09 - 0.02)  |
|                                   | Female | 109169<br>(79707 - 143011)  | 469.06<br>(342.47 - 614.47) | 73310<br>(53648 - 95797)     | 464.88<br>(340.2 - 607.48)  | -0.03(-0.09 - 0.02)  |
|                                   | Male   | 102878<br>(75032 - 135174)  | 428.72<br>(312.68 - 563.31) | 70262<br>(51203 - 92118)     | 424.34<br>(309.24 - 556.34) | -0.05(-0.17 - 0.06)  |
| <b>Eastern Sub-Saharan Africa</b> | Both   | 324330<br>(219026 - 455215) | 524.67<br>(354.32 - 736.4)  | 750486<br>(507218 - 1050535) | 537.27<br>(363.12 - 752.08) | 0.08(0.07 - 0.09)    |
|                                   | Female | 168703<br>(113947 - 235868) | 540.13<br>(364.82 - 755.17) | 384844<br>(259718 - 537891)  | 549.94<br>(371.14 - 768.65) | 0.06(0.06 - 0.07)    |

|                                             |        |                              |                              |                               |                              |                      |
|---------------------------------------------|--------|------------------------------|------------------------------|-------------------------------|------------------------------|----------------------|
|                                             | Male   | 155627<br>(104683 - 219352)  | 508.87<br>(342.3 - 717.25)   | 365642<br>(246842 - 512779)   | 524.55<br>(354.12 - 735.63)  | 0.1(0.1 - 0.11)      |
| <b>High-income<br/>Asia Pacific</b>         | Both   | 258321<br>(189006 - 344212)  | 612.71<br>(448.3 - 816.43)   | 165026<br>(120401 - 220498)   | 612.68<br>(447 - 818.62)     | 0(-0.06 - 0.05)      |
|                                             |        | 119284<br>(87171 - 158158)   | 580.9<br>(424.52 - 770.21)   | 75169<br>(54470 - 99660)      | 576.7<br>(417.9 - 764.6)     | -0.03(-0.08 - 0.01)  |
|                                             | Male   | 139037<br>(100534 - 186260)  | 642.9<br>(464.87 - 861.26)   | 89857<br>(65238 - 120696)     | 646.41<br>(469.31 - 868.26)  | 0.01(-0.02 - 0.05)   |
| <b>High-income<br/>North<br/>America</b>    | Both   | 484954<br>(430601 - 543426)  | 795.61<br>(706.44 - 891.54)  | 556190<br>(492551 - 624316)   | 783.69<br>(694.02 - 879.68)  | -0.05(-0.06 - -0.04) |
|                                             | Female | 212163<br>(187233 - 238745)  | 711.95<br>(628.3 - 801.15)   | 243110<br>(215189 - 274290)   | 700.4<br>(619.96 - 790.23)   | -0.06(-0.07 - -0.04) |
|                                             | Male   | 272791<br>(241667 - 305638)  | 875.63<br>(775.73 - 981.07)  | 313079<br>(275781 - 349506)   | 863.42<br>(760.56 - 963.88)  | -0.04(-0.06 - -0.03) |
| <b>North Africa<br/>and Middle<br/>East</b> | Both   | 828647<br>(551191 - 1168216) | 750.33<br>(499.1 - 1057.81)  | 1247374<br>(818466 - 1780321) | 773.42<br>(507.48 - 1103.86) | 0.1(0.09 - 0.12)     |
|                                             | Female | 472311<br>(316643 - 660107)  | 876.31<br>(587.49 - 1224.74) | 703627<br>(462922 - 991678)   | 901.94<br>(593.39 - 1271.18) | 0.1(0.09 - 0.11)     |

|                       |        |                              |                             |                                |                             |                   |
|-----------------------|--------|------------------------------|-----------------------------|--------------------------------|-----------------------------|-------------------|
|                       | Male   | 356337<br>(234066 - 508677)  | 630.24<br>(413.98 - 899.67) | 543747<br>(352993 - 780528)    | 653.01<br>(423.92 - 937.36) | 0.12(0.11 - 0.13) |
| <b>Oceania</b>        | Both   | 4544<br>(2816 - 6753)        | 219.27<br>(135.89 - 325.84) | 8720<br>(5422 - 12899)         | 223.71<br>(139.1 - 330.92)  | 0.07(0.06 - 0.09) |
|                       | Female | 2220<br>(1363 - 3279)        | 222.29<br>(136.46 - 328.37) | 4211<br>(2598 - 6202)          | 226.38<br>(139.68 - 333.4)  | 0.06(0.05 - 0.08) |
|                       | Male   | 2325<br>(1421 - 3511)        | 216.46<br>(132.35 - 326.91) | 4509<br>(2745 - 6785)          | 221.27<br>(134.7 - 332.97)  | 0.08(0.06 - 0.1)  |
| <b>South Asia</b>     | Both   | 954996<br>(689586 - 1267370) | 285.12<br>(205.88 - 378.38) | 1565374<br>(1133542 - 2068550) | 297.71<br>(215.58 - 393.41) | 0.15(0.14 - 0.16) |
|                       | Female | 431140<br>(309495 - 576929)  | 266.78<br>(191.51 - 356.99) | 710480<br>(513182 - 943723)    | 279.12<br>(201.61 - 370.75) | 0.16(0.15 - 0.16) |
|                       | Male   | 523856<br>(378919 - 693376)  | 302.23<br>(218.61 - 400.03) | 854893<br>(621334 - 1125831)   | 315.16<br>(229.06 - 415.04) | 0.14(0.12 - 0.16) |
| <b>Southeast Asia</b> | Both   | 401052<br>(276498 - 554606)  | 270.69<br>(186.62 - 374.33) | 476519<br>(330606 - 653746)    | 280.56<br>(194.65 - 384.9)  | 0.12(0.12 - 0.13) |
|                       | Female | 205825<br>(141495 - 283176)  | 277.87<br>(191.02 - 382.3)  | 238779<br>(165206 - 326540)    | 286.58<br>(198.28 - 391.91) | 0.11(0.1 - 0.12)  |
|                       | Male   | 195227<br>(134764 - 270624)  | 263.51<br>(181.9 - 365.27)  | 237739<br>(165884 - 326791)    | 274.76<br>(191.71 - 377.68) | 0.14(0.14 - 0.15) |

|                                    |        |                             |                                |                             |                                |                   |
|------------------------------------|--------|-----------------------------|--------------------------------|-----------------------------|--------------------------------|-------------------|
| <b>Southern Latin America</b>      | Both   | 130730<br>(85253 - 191678)  | 987.4<br>(643.91 - 1447.73)    | 169239<br>(108457 - 242272) | 1112.74<br>(713.1 - 1592.93)   | 0.42(0.4 - 0.43)  |
|                                    | Female | 62276<br>(40290 - 89917)    | 941.31<br>(608.99 - 1359.1)    | 75750<br>(49305 - 111373)   | 1008.56<br>(656.46 - 1482.84)  | 0.24(0.23 - 0.25) |
|                                    | Male   | 68454<br>(44334 - 101021)   | 1033.42<br>(669.29 - 1525.08)  | 93489<br>(59796 - 133457)   | 1214.38<br>(776.73 - 1733.55)  | 0.57(0.48 - 0.66) |
| <b>Southern Sub-Saharan Africa</b> | Both   | 87405<br>(62543 - 118186)   | 504.85<br>(361.24 - 682.64)    | 110292<br>(78343 - 149221)  | 517.26<br>(367.42 - 699.83)    | 0.08(0.07 - 0.09) |
|                                    | Female | 45700<br>(32686 - 61615)    | 514.3<br>(367.85 - 693.41)     | 55579<br>(39538 - 75617)    | 524.16<br>(372.88 - 713.14)    | 0.06(0.05 - 0.08) |
|                                    | Male   | 41705<br>(29550 - 56228)    | 494.87<br>(350.64 - 667.2)     | 54713<br>(38749 - 74008)    | 510.43<br>(361.5 - 690.44)     | 0.11(0.1 - 0.12)  |
| <b>Tropical Latin America</b>      | Both   | 583975<br>(441065 - 758940) | 1221.42<br>(922.52 - 1587.37)  | 669397<br>(505363 - 867166) | 1282.76<br>(968.42 - 1661.74)  | 0.18(0.16 - 0.2)  |
|                                    | Female | 320208<br>(242801 - 415387) | 1334.74<br>(1012.08 - 1731.48) | 361377<br>(274726 - 465827) | 1402.31<br>(1066.06 - 1807.62) | 0.18(0.16 - 0.2)  |
|                                    | Male   | 263767<br>(197277 - 345345) | 1107.3<br>(828.17 - 1449.76)   | 308021<br>(230310 - 401127) | 1166.12<br>(871.92 - 1518.61)  | 0.19(0.16 - 0.21) |

|                                   |        |                              |                               |                             |                              |                      |
|-----------------------------------|--------|------------------------------|-------------------------------|-----------------------------|------------------------------|----------------------|
| <b>Western Europe</b>             | Both   | 772514<br>(557917 - 1026631) | 940.07<br>(678.93 - 1249.31)  | 663243<br>(480721 - 882790) | 926.56<br>(671.57 - 1233.27) | -0.05(-0.07 - -0.03) |
|                                   | Female | 426149<br>(307722 - 564408)  | 1059.02<br>(764.72 - 1402.61) | 361711<br>(264827 - 475896) | 1041.8<br>(762.75 - 1370.67) | -0.05(-0.08 - -0.03) |
|                                   | Male   | 346365<br>(250611 - 464448)  | 825.93<br>(597.6 - 1107.51)   | 301532<br>(218219 - 403865) | 818.01<br>(592 - 1095.63)    | -0.03(-0.05 - -0.01) |
| <b>Western Sub-Saharan Africa</b> | Both   | 278973<br>(191332 - 388183)  | 468.21<br>(321.12 - 651.5)    | 706277<br>(484016 - 982633) | 468.3<br>(320.93 - 651.54)   | 0(0 - 0.01)          |
|                                   | Female | 147186<br>(100820 - 204242)  | 475.59<br>(325.77 - 659.95)   | 367719<br>(252489 - 510183) | 476.35<br>(327.08 - 660.9)   | 0(0 - 0.01)          |
|                                   | Male   | 131787<br>(89304 - 183692)   | 460.23<br>(311.87 - 641.5)    | 338558<br>(228777 - 472330) | 459.87<br>(310.75 - 641.57)  | 0(-0.01 - 0)         |

**Supplement table S3: The years lived with disability (YLDs) of bipolar disorder aged 10-24 years and its average annual percentage change (AAPC) from 1990 to 2019 at the global and regional levels**

| Location               | Sex    | 1990                          |                              | 2019                           |                              | AAPC<br>(95% CI)  |
|------------------------|--------|-------------------------------|------------------------------|--------------------------------|------------------------------|-------------------|
|                        |        | Case (95% UI)                 | Rate (per 100000 population) | Case (95% UI)                  | Rate (per 100000 population) |                   |
| <b>Global</b>          | Both   | 1568093<br>(864253 - 2483445) | 101.23<br>(55.8 - 160.33)    | 2004935<br>(1085274 - 3224662) | 107.68<br>(58.29 - 173.19)   | 0.21(0.20 - 0.22) |
|                        | Female | 804568<br>(441758 - 1275837)  | 105.61<br>(57.99 - 167.47)   | 1013966<br>(551155 - 1626707)  | 111.62<br>(60.67 - 179.08)   | 0.19(0.18 - 0.2)  |
|                        | Male   | 763525<br>(417762 - 1214595)  | 97<br>(53.07 - 154.3)        | 990969<br>(540256 - 1602783)   | 103.93<br>(56.66 - 168.1)    | 0.24(0.23 - 0.25) |
| <b>High SDI</b>        | Both   | 317601<br>(182610 - 492718)   | 173.21<br>(99.59 - 268.72)   | 310209<br>(181674 - 472965)    | 176.72<br>(103.5 - 269.44)   | 0.07(0.06 - 0.08) |
|                        | Female | 154817<br>(89168 - 240235)    | 173.25<br>(99.78 - 268.83)   | 149425<br>(87968 - 228792)     | 175.96<br>(103.59 - 269.42)  | 0.05(0.03 - 0.07) |
|                        | Male   | 162784<br>(94267 - 250581)    | 173.18<br>(100.29 - 266.58)  | 160784<br>(93359 - 245025)     | 177.43<br>(103.03 - 270.4)   | 0.09(0.07 - 0.1)  |
| <b>High-middle SDI</b> | Both   | 311198<br>(167438 - 502516)   | 102.84<br>(55.33 - 166.06)   | 290591<br>(158475 - 467055)    | 114.52<br>(62.45 - 184.06)   | 0.37(0.33 - 0.41) |

|                       |        |                             |                            |                             |                            |                   |
|-----------------------|--------|-----------------------------|----------------------------|-----------------------------|----------------------------|-------------------|
|                       | Female | 163802<br>(87651 - 263515)  | 110.34<br>(59.05 - 177.52) | 149205<br>(81497 - 238885)  | 122.67<br>(67 - 196.4)     | 0.36(0.34 - 0.39) |
|                       | Male   | 147396<br>(78997 - 235489)  | 95.61<br>(51.24 - 152.76)  | 141385<br>(76981 - 228631)  | 107.01<br>(58.27 - 173.05) | 0.39(0.36 - 0.42) |
| <b>Middle SDI</b>     | Both   | 476270<br>(258784 - 751485) | 87.48<br>(47.53 - 138.04)  | 552755<br>(301832 - 891012) | 100.59<br>(54.92 - 162.14) | 0.48(0.46 - 0.50) |
|                       | Female | 252715<br>(137014 - 398914) | 94.2<br>(51.07 - 148.7)    | 288235<br>(157292 - 459663) | 108.34<br>(59.12 - 172.78) | 0.48(0.46 - 0.5)  |
|                       | Male   | 223555<br>(121242 - 355896) | 80.96<br>(43.91 - 128.88)  | 264521<br>(142580 - 428362) | 93.31<br>(50.29 - 151.1)   | 0.49(0.46 - 0.52) |
| <b>Low-middle SDI</b> | Both   | 299354<br>(161522 - 484428) | 84.59<br>(45.64 - 136.89)  | 467104<br>(253069 - 764440) | 91.51<br>(49.58 - 149.77)  | 0.27(0.25 - 0.29) |
|                       | Female | 150353<br>(79719 - 243162)  | 86.31<br>(45.76 - 139.59)  | 232636<br>(124341 - 378085) | 92.77<br>(49.58 - 150.77)  | 0.24(0.23 - 0.26) |
|                       | Male   | 149001<br>(81140 - 242368)  | 82.92<br>(45.16 - 134.88)  | 234468<br>(126039 - 381272) | 90.3<br>(48.54 - 146.84)   | 0.29(0.28 - 0.3)  |
| <b>Low SDI</b>        | Both   | 162416<br>(84016 - 267607)  | 99.12<br>(51.28 - 163.32)  | 382676<br>(199041 - 641066) | 103.01<br>(53.58 - 172.57) | 0.13(0.12 - 0.14) |

|                             |        |                           |                             |                             |                             |                      |
|-----------------------------|--------|---------------------------|-----------------------------|-----------------------------|-----------------------------|----------------------|
|                             | Female | 82198<br>(43088 - 135502) | 101.33<br>(53.12 - 167.05)  | 193607<br>(101258 - 324675) | 104.96<br>(54.89 - 176.01)  | 0.12(0.1 - 0.14)     |
|                             | Male   | 80218<br>(41439 - 132118) | 96.96<br>(50.09 - 159.69)   | 189069<br>(98683 - 315695)  | 101.1<br>(52.77 - 168.8)    | 0.14(0.13 - 0.16)    |
| <b>Andean Latin America</b> | Both   | 24460<br>(12606 - 41151)  | 198.85<br>(102.48 - 334.55) | 34962<br>(17823 - 59331)    | 207.71<br>(105.88 - 352.49) | 0.15 (0.13 - 0.18)   |
|                             | Female | 13445<br>(6892 - 23140)   | 217.4<br>(111.45 - 374.17)  | 18521<br>(9393 - 31741)     | 226.91<br>(115.08 - 388.87) | 0.15(0.11 - 0.19)    |
|                             | Male   | 11015<br>(5715 - 18775)   | 180.1<br>(93.44 - 306.97)   | 16441<br>(8340 - 27919)     | 189.64<br>(96.2 - 322.03)   | 0.18(0.16 - 0.21)    |
| <b>Australasia</b>          | Both   | 15268<br>(8736 - 24646)   | 317.3<br>(181.54 - 512.18)  | 17096<br>(9787 - 27226)     | 315.08<br>(180.38 - 501.78) | -0.02(-0.06 - 0.02)  |
|                             | Female | 6898<br>(3853 - 11124)    | 291.94<br>(163.07 - 470.81) | 7602<br>(4316 - 11945)      | 286.46<br>(162.65 - 450.12) | -0.07(-0.14 - -0.01) |
|                             | Male   | 8370<br>(4620 - 13251)    | 341.76<br>(188.65 - 541.04) | 9494<br>(5384 - 15437)      | 342.48<br>(194.23 - 556.85) | 0.01(-0.04 - 0.05)   |
| <b>Caribbean</b>            | Both   | 22596<br>(11612 - 38344)  | 212.18<br>(109.04 - 360.06) | 24045<br>(12546 - 40693)    | 209.9<br>(109.52 - 355.24)  | -0.04(-0.07 - 0)     |

|                              |        |                            |                             |                            |                             |                     |
|------------------------------|--------|----------------------------|-----------------------------|----------------------------|-----------------------------|---------------------|
|                              | Female | 12499<br>(6415 - 21213)    | 233.29<br>(119.74 - 395.95) | 13087<br>(6737 - 22049)    | 230.47<br>(118.65 - 388.28) | -0.04(-0.09 - 0.01) |
|                              | Male   | 10097<br>(5187 - 17596)    | 190.81<br>(98.02 - 332.52)  | 10957<br>(5697 - 18972)    | 189.68<br>(98.62 - 328.43)  | -0.02(-0.05 - 0.02) |
| <b>Central Asia</b>          | Both   | 20084<br>(10272 - 35165)   | 101.24<br>(51.78 - 177.27)  | 23369<br>(11919 - 40371)   | 103.34<br>(52.71 - 178.53)  | 0.07(0. - 0.13)     |
|                              | Female | 10378<br>(5299 - 18045)    | 105.52<br>(53.88 - 183.49)  | 11815<br>(6027 - 20286)    | 107.34<br>(54.75 - 184.3)   | 0.06(0 - 0.12)      |
|                              | Male   | 9706<br>(4920 - 16724)     | 97.04<br>(49.19 - 167.19)   | 11554<br>(5881 - 19976)    | 99.54<br>(50.67 - 172.11)   | 0.08(-0.01 - 0.17)  |
| <b>Central Europe</b>        | Both   | 31747<br>(16643 - 52115)   | 110.59<br>(57.97 - 181.53)  | 20439<br>(10784 - 33223)   | 113.69<br>(59.99 - 184.8)   | 0.1(0.06 - 0.12)    |
|                              | Female | 16659<br>(8739 - 27492)    | 118.53<br>(62.18 - 195.61)  | 10631<br>(5713 - 17234)    | 121.78<br>(65.44 - 197.4)   | 0.09(0.06 - 0.12)   |
|                              | Male   | 15088<br>(7894 - 24956)    | 102.97<br>(53.87 - 170.3)   | 9808<br>(5095 - 16154)     | 106.05<br>(55.09 - 174.68)  | 0.1(0.07 - 0.13)    |
| <b>Central Latin America</b> | Both   | 103914<br>(56275 - 164559) | 192.04<br>(104 - 304.12)    | 131197<br>(70944 - 208126) | 199.4<br>(107.82 - 316.31)  | 0.13(0.11 - 0.15)   |

|                                   |        |                            |                             |                           |                            |                     |
|-----------------------------------|--------|----------------------------|-----------------------------|---------------------------|----------------------------|---------------------|
|                                   | Female | 58953<br>(31974 - 93516)   | 215.38<br>(116.81 - 341.65) | 72996<br>(39473 - 114922) | 223.6<br>(120.91 - 352.02) | 0.13(0.11 - 0.15)   |
|                                   | Male   | 44961<br>(24472 - 71720)   | 168.15<br>(91.53 - 268.23)  | 58202<br>(31386 - 93021)  | 175.56<br>(94.67 - 280.6)  | 0.14(0.12 - 0.17)   |
| <b>Central Sub-Saharan Africa</b> | Both   | 18864<br>(9324 - 32272)    | 108.95<br>(53.85 - 186.39)  | 47233<br>(23312 - 80977)  | 109.9<br>(54.24 - 188.41)  | 0.02(-0.01 - 0.06)  |
|                                   | Female | 9497<br>(4613 - 16293)     | 110.01<br>(53.43 - 188.73)  | 23865<br>(11717 - 40705)  | 110.97<br>(54.48 - 189.28) | 0.03(-0.01 - 0.06)  |
|                                   | Male   | 9367<br>(4684 - 16165)     | 107.9<br>(53.96 - 186.21)   | 23368<br>(11601 - 40624)  | 108.82<br>(54.02 - 189.18) | 0.03(0 - 0.06)      |
| <b>East Asia</b>                  | Both   | 144926<br>(79388 - 227224) | 38.82<br>(21.27 - 60.87)    | 90816<br>(50532 - 143733) | 38.33<br>(21.33 - 60.67)   | -0.07(-0.16 - 0.03) |
|                                   | Female | 73990<br>(41119 - 117335)  | 40.67<br>(22.6 - 64.5)      | 44649<br>(24805 - 71704)  | 40.23<br>(22.35 - 64.61)   | -0.06(-0.15 - 0.02) |
|                                   | Male   | 70936<br>(38726 - 111515)  | 37.06<br>(20.23 - 58.27)    | 46167<br>(25437 - 73717)  | 36.65<br>(20.19 - 58.53)   | -0.06(-0.17 - 0.04) |
| <b>Eastern Europe</b>             | Both   | 47626<br>(26067 - 75198)   | 100.75<br>(55.15 - 159.08)  | 32342<br>(17969 - 51653)  | 100.05<br>(55.59 - 159.78) | -0.04(-0.15 - 0.07) |

|                                   |        |                            |                             |                            |                             |                     |
|-----------------------------------|--------|----------------------------|-----------------------------|----------------------------|-----------------------------|---------------------|
|                                   | Female | 24393<br>(13329 - 38733)   | 104.81<br>(57.27 - 166.42)  | 16426<br>(9136 - 26145)    | 104.16<br>(57.93 - 165.79)  | -0.04(-0.16 - 0.08) |
|                                   | Male   | 23233<br>(12705 - 36789)   | 96.82<br>(52.94 - 153.31)   | 15917<br>(8765 - 25391)    | 96.13<br>(52.94 - 153.35)   | -0.04(-0.15 - 0.07) |
| <b>Eastern Sub-Saharan Africa</b> | Both   | 71999<br>(37623 - 118447)  | 116.47<br>(60.86 - 191.61)  | 167942<br>(88092 - 279124) | 120.23<br>(63.06 - 199.82)  | 0.11(0.09 - 0.13)   |
|                                   | Female | 37284<br>(19582 - 61719)   | 119.37<br>(62.69 - 197.6)   | 85794<br>(45254 - 141416)  | 122.6<br>(64.67 - 202.08)   | 0.09(0.07 - 0.12)   |
|                                   | Male   | 34715<br>(18225 - 57616)   | 113.51<br>(59.59 - 188.4)   | 82149<br>(42770 - 136647)  | 117.85<br>(61.36 - 196.03)  | 0.13(0.11 - 0.15)   |
| <b>High-income Asia Pacific</b>   | Both   | 58095<br>(31745 - 91991)   | 137.79<br>(75.3 - 218.19)   | 37152<br>(20096 - 58918)   | 137.93<br>(74.61 - 218.74)  | -0.00(-0.05 - 0.04) |
|                                   |        | 26601<br>(14530 - 42298)   | 129.54<br>(70.76 - 205.99)  | 16819<br>(9186 - 26790)    | 129.04<br>(70.47 - 205.54)  | -0.02(-0.08 - 0.03) |
|                                   | Male   | 31494<br>(17220 - 50770)   | 145.63<br>(79.62 - 234.76)  | 20334<br>(11140 - 32665)   | 146.27<br>(80.14 - 234.99)  | 0.01(-0.03 - 0.05)  |
| <b>High-income North America</b>  | Both   | 107715<br>(67115 - 160228) | 176.72<br>(110.11 - 262.87) | 122862<br>(76601 - 184378) | 173.12<br>(107.93 - 259.79) | -0.07(-0.09 - 0.05) |

|                                     |        |                             |                             |                             |                             |                      |
|-------------------------------------|--------|-----------------------------|-----------------------------|-----------------------------|-----------------------------|----------------------|
|                                     | Female | 46750<br>(29018 - 70567)    | 156.88<br>(97.37 - 236.8)   | 53166<br>(32794 - 80384)    | 153.17<br>(94.48 - 231.58)  | -0.08(-0.11 - -0.05) |
|                                     | Male   | 60964<br>(37829 - 91149)    | 195.69<br>(121.43 - 292.58) | 69696<br>(43565 - 104248)   | 192.21<br>(120.15 - 287.5)  | -0.06(-0.09 - -0.04) |
| <b>North Africa and Middle East</b> | Both   | 185017<br>(95668 - 311201)  | 167.53<br>(86.63 - 281.79)  | 278922<br>(144076 - 471648) | 172.94<br>(89.33 - 292.44)  | 0.11(0.09 - 0.13)    |
|                                     | Female | 104797<br>(54397 - 175277)  | 194.44<br>(100.93 - 325.2)  | 156366<br>(80051 - 262379)  | 200.44<br>(102.61 - 336.33) | 0.1(0.09 - 0.12)     |
|                                     | Male   | 80220<br>(42208 - 135423)   | 141.88<br>(74.65 - 239.52)  | 122556<br>(63200 - 207402)  | 147.18<br>(75.9 - 249.08)   | 0.13(0.1 - 0.15)     |
| <b>Oceania</b>                      | Both   | 1012<br>(504 - 1738)        | 48.84<br>(24.31 - 83.87)    | 1960<br>(979 - 3487)        | 50.28<br>(25.12 - 89.46)    | 0.09(0.06 - 0.13)    |
|                                     | Female | 491<br>(246 - 848)          | 49.21<br>(24.59 - 84.89)    | 938<br>(463 - 1668)         | 50.41<br>(24.88 - 89.67)    | 0.07(-0.01 - 0.14)   |
|                                     | Male   | 521<br>(257 - 930)          | 48.5<br>(23.9 - 86.65)      | 1022<br>(493 - 1811)        | 50.16<br>(24.2 - 88.89)     | 0.11(0.07 - 0.16)    |
| <b>South Asia</b>                   | Both   | 212380<br>(116110 - 340204) | 63.41<br>(34.67 - 101.57)   | 350383<br>(194721 - 552426) | 66.64<br>(37.03 - 105.06)   | 0.17(0.15 - 0.19)    |

|                                    |        |                            |                             |                             |                             |                   |
|------------------------------------|--------|----------------------------|-----------------------------|-----------------------------|-----------------------------|-------------------|
|                                    | Female | 94902<br>(50219 - 150658)  | 58.72<br>(31.07 - 93.22)    | 157469<br>(86581 - 251055)  | 61.86<br>(34.01 - 98.63)    | 0.18(0.16 - 0.2)  |
|                                    | Male   | 117478<br>(64854 - 189242) | 67.78<br>(37.42 - 109.18)   | 192913<br>(106587 - 303362) | 71.12<br>(39.29 - 111.84)   | 0.16(0.14 - 0.19) |
| <b>Southeast Asia</b>              | Both   | 89937<br>(48278 - 149679)  | 60.7<br>(32.58 - 101.03)    | 107283<br>(57408 - 173241)  | 63.16<br>(33.8 - 102)       | 0.14(0.12 - 0.16) |
|                                    | Female | 45921<br>(24320 - 76447)   | 61.99<br>(32.83 - 103.21)   | 53480<br>(28842 - 86844)    | 64.19<br>(34.62 - 104.23)   | 0.12(0.1 - 0.14)  |
|                                    | Male   | 44016<br>(23340 - 73233)   | 59.41<br>(31.5 - 98.85)     | 53803<br>(28415 - 88872)    | 62.18<br>(32.84 - 102.71)   | 0.16(0.14 - 0.17) |
| <b>Southern Latin America</b>      | Both   | 29294<br>(15031 - 50717)   | 221.26<br>(113.53 - 383.06) | 37987<br>(20022 - 63501)    | 249.76<br>(131.65 - 417.52) | 0.42(0.38 - 0.46) |
|                                    | Female | 13843<br>(7258 - 23403)    | 209.23<br>(109.71 - 353.74) | 16882<br>(8694 - 28924)     | 224.76<br>(115.76 - 385.1)  | 0.24(0.2 - 0.28)  |
|                                    | Male   | 15452<br>(7716 - 27094)    | 233.27<br>(116.48 - 409.02) | 21105<br>(10771 - 35588)    | 274.15<br>(139.91 - 462.28) | 0.57(0.47 - 0.67) |
| <b>Southern Sub-Saharan Africa</b> | Both   | 19541<br>(10515 - 31383)   | 112.87<br>(60.73 - 181.27)  | 24669<br>(13137 - 40662)    | 115.69<br>(61.61 - 190.7)   | 0.09(0.06 - 0.11) |

|                                   |        |                            |                             |                            |                             |                      |
|-----------------------------------|--------|----------------------------|-----------------------------|----------------------------|-----------------------------|----------------------|
|                                   | Female | 10147<br>(5455 - 16359)    | 114.19<br>(61.39 - 184.1)   | 12333<br>(6618 - 20493)    | 116.31<br>(62.42 - 193.27)  | 0.06(0.01 - 0.11)    |
|                                   | Male   | 9394<br>(5118 - 15028)     | 111.47<br>(60.73 - 178.33)  | 12336<br>(6516 - 20032)    | 115.08<br>(60.79 - 186.88)  | 0.12(0.08 - 0.15)    |
| <b>Tropical Latin America</b>     | Both   | 129914<br>(73746 - 205462) | 271.72<br>(154.24 - 429.74) | 148919<br>(85211 - 234419) | 285.37<br>(163.29 - 449.21) | 0.18(0.16 - 0.2)     |
|                                   | Female | 70544<br>(40190 - 111574)  | 294.05<br>(167.53 - 465.08) | 79707<br>(45524 - 125783)  | 309.3<br>(176.65 - 488.1)   | 0.18(0.16 - 0.2)     |
|                                   | Male   | 59370<br>(33550 - 93896)   | 249.24<br>(140.84 - 394.18) | 69212<br>(39352 - 109797)  | 262.03<br>(148.98 - 415.67) | 0.18(0.15 - 0.21)    |
| <b>Western Europe</b>             | Both   | 171725<br>(94233 - 274253) | 208.97<br>(114.67 - 333.74) | 147537<br>(80235 - 237632) | 206.11<br>(112.09 - 331.97) | -0.05(-0.06 - 0.03)  |
|                                   | Female | 93966<br>(51698 - 149789)  | 233.52<br>(128.47 - 372.24) | 79766<br>(43576 - 127898)  | 229.74<br>(125.51 - 368.37) | -0.05(-0.07 - -0.04) |
|                                   | Male   | 77759<br>(42033 - 125284)  | 185.42<br>(100.23 - 298.75) | 67771<br>(36567 - 109947)  | 183.85<br>(99.2 - 298.27)   | -0.03(-0.04 - -0.01) |
| <b>Western Sub-Saharan Africa</b> | Both   | 61979<br>(32930 - 102237)  | 104.02<br>(55.27 - 171.59)  | 157820<br>(83552 - 265442) | 104.64<br>(55.4 - 176)      | 0.02(0.01 - 0.03)    |

---

|        |                          |                           |                           |                            |                   |
|--------|--------------------------|---------------------------|---------------------------|----------------------------|-------------------|
| Female | 32610<br>(17299 - 53380) | 105.37<br>(55.9 - 172.48) | 81655<br>(43053 - 135483) | 105.78<br>(55.77 - 175.51) | 0.01(0 - 0.03)    |
| Male   | 29369<br>(15634 - 49107) | 102.56<br>(54.6 - 171.49) | 76165<br>(40291 - 125906) | 103.46<br>(54.73 - 171.02) | 0.03(0.02 - 0.04) |

---

**Supplement table S4: The incidence of bipolar disorder aged 10-24 years and its average annual percentage change (AAPC) from 1990 to 2019 at 204 countries levels**

| Location                   | 1990                    |                              | 2019                     |                              | AAPC<br>(95% CI)        |
|----------------------------|-------------------------|------------------------------|--------------------------|------------------------------|-------------------------|
|                            | Case (95% UI)           | Rate (per 100000 population) | Case (95% UI)            | Rate (per 100000 population) |                         |
| <b>Afghanistan</b>         | 5412<br>(3544 - 7794)   | 142.68<br>(93.44 - 205.49)   | 18161<br>(11986 - 26120) | 139.73<br>(92.22 - 200.97)   | -0.076(-0.17 - 0.019)   |
| <b>Albania</b>             | 820<br>(546 - 1158)     | 82.51<br>(54.91 - 116.43)    | 461<br>(306 - 651)       | 81.44<br>(54.07 - 114.91)    | -0.046(-0.058 - -0.033) |
| <b>Algeria</b>             | 11462<br>(7541 - 16273) | 134.3<br>(88.36 - 190.66)    | 12835<br>(8483 - 18352)  | 131.34<br>(86.8 - 187.79)    | -0.079(-0.093 - -0.064) |
| <b>American Samoa</b>      | 6<br>(4 - 9)            | 41.56<br>(26.74 - 61.53)     | 7<br>(5 - 11)            | 42.09<br>(27.02 - 62.54)     | 0.044(0.034 - 0.054)    |
| <b>Andorra</b>             | 16<br>(11 - 22)         | 128.76<br>(87.95 - 180.37)   | 17<br>(12 - 24)          | 134.09<br>(90.55 - 188.94)   | 0.156(-0.037 - 0.349)   |
| <b>Angola</b>              | 3192<br>(2121 - 4639)   | 99.5<br>(66.13 - 144.63)     | 9579<br>(6278 - 13931)   | 99.49<br>(65.2 - 144.69)     | -0.003(-0.01 - 0.004)   |
| <b>Antigua and Barbuda</b> | 28<br>(18 - 39)         | 158.07<br>(103.81 - 225.33)  | 32<br>(21 - 45)          | 156.68<br>(102.96 - 222.42)  | -0.028(-0.04 - -0.016)  |
| <b>Argentina</b>           | 14957<br>(9939 - 21461) | 171.59<br>(114.03 - 246.2)   | 19118<br>(12670 - 26803) | 179.59<br>(119.02 - 251.78)  | 0.151(0.096 - 0.205)    |

|                   |                          |                             |                          |                             |                         |
|-------------------|--------------------------|-----------------------------|--------------------------|-----------------------------|-------------------------|
| <b>Armenia</b>    | 711<br>(472 - 1026)      | 81.58<br>(54.21 - 117.75)   | 438<br>(290 - 635)       | 80.48<br>(53.28 - 116.6)    | -0.051(-0.066 - -0.036) |
| <b>Australia</b>  | 8190<br>(6104 - 10630)   | 206.28<br>(153.75 - 267.75) | 9352<br>(6885 - 11927)   | 205.96<br>(151.63 - 262.67) | -0.006(-0.046 - 0.034)  |
| <b>Austria</b>    | 2003<br>(1366 - 2806)    | 123.3<br>(84.05 - 172.68)   | 1796<br>(1221 - 2534)    | 126.83<br>(86.24 - 179.02)  | 0.093(0.058 - 0.129)    |
| <b>Azerbaijan</b> | 1725<br>(1142 - 2516)    | 81.46<br>(53.96 - 118.82)   | 1768<br>(1173 - 2577)    | 80.23<br>(53.23 - 116.91)   | -0.057(-0.077 - -0.036) |
| <b>Bahamas</b>    | 128<br>(84 - 183)        | 158.02<br>(103.61 - 226.35) | 147<br>(96 - 211)        | 157.78<br>(103.48 - 226.01) | -0.007(-0.021 - 0.008)  |
| <b>Bahrain</b>    | 167<br>(114 - 235)       | 129.37<br>(87.85 - 181.49)  | 331<br>(224 - 464)       | 133.43<br>(90.31 - 186.92)  | 0.114(-0.056 - 0.284)   |
| <b>Bangladesh</b> | 21152<br>(13843 - 31069) | 60.11<br>(39.34 - 88.29)    | 27066<br>(17989 - 39405) | 59.73<br>(39.7 - 86.96)     | -0.023(-0.028 - -0.018) |
| <b>Barbados</b>   | 106<br>(69 - 149)        | 157.18<br>(102.35 - 220.51) | 91<br>(59 - 127)         | 158.13<br>(102.9 - 221.8)   | 0.026(-0.005 - 0.056)   |
| <b>Belarus</b>    | 1804<br>(1189 - 2609)    | 81.35<br>(53.61 - 117.68)   | 1139<br>(752 - 1646)     | 80.79<br>(53.32 - 116.81)   | -0.021(-0.051 - 0.008)  |

|                                         |                           |                             |                            |                             |                         |
|-----------------------------------------|---------------------------|-----------------------------|----------------------------|-----------------------------|-------------------------|
| <b>Belgium</b>                          | 2563<br>(1710 - 3604)     | 127.33<br>(84.97 - 179.06)  | 2537<br>(1723 - 3591)      | 130.8<br>(88.83 - 185.11)   | 0.093(0.073 - 0.112)    |
| <b>Belize</b>                           | 101<br>(65 - 141)         | 161.4<br>(104.47 - 226.11)  | 206<br>(135 - 287)         | 160.08<br>(104.52 - 222.8)  | -0.028(-0.034 - -0.023) |
| <b>Benin</b>                            | 1366<br>(887 - 1985)      | 94.68<br>(61.48 - 137.56)   | 3895<br>(2528 - 5633)      | 94.89<br>(61.58 - 137.23)   | 0.007(0.003 - 0.011)    |
| <b>Bermuda</b>                          | 19<br>(13 - 27)           | 155.96<br>(101.02 - 219.75) | 15<br>(10 - 21)            | 160.09<br>(104.56 - 225.86) | 0.094(0.083 - 0.105)    |
| <b>Bhutan</b>                           | 130<br>(85 - 186)         | 60.42<br>(39.58 - 86.86)    | 127<br>(83 - 184)          | 59.36<br>(39 - 85.85)       | -0.062(-0.085 - -0.039) |
| <b>Bolivia (Plurinational State of)</b> | 3228<br>(2130 - 4542)     | 161.27<br>(106.4 - 226.88)  | 5126<br>(3379 - 7168)      | 158.09<br>(104.2 - 221.07)  | -0.07(-0.074 - -0.066)  |
| <b>Bosnia and Herzegovina</b>           | 957<br>(638 - 1374)       | 81.91<br>(54.65 - 117.6)    | 462<br>(308 - 672)         | 81.26<br>(54.21 - 118.2)    | -0.023(-0.052 - 0.005)  |
| <b>Botswana</b>                         | 460<br>(298 - 669)        | 101.94<br>(66.03 - 148.38)  | 656<br>(427 - 941)         | 100.81<br>(65.69 - 144.72)  | -0.04(-0.045 - -0.035)  |
| <b>Brazil</b>                           | 98914<br>(75547 - 126507) | 212.36<br>(162.19 - 271.6)  | 103888<br>(79018 - 132046) | 206.81<br>(157.3 - 262.87)  | -0.093(-0.103 - -0.084) |

|                                 |                        |                             |                        |                             |                         |
|---------------------------------|------------------------|-----------------------------|------------------------|-----------------------------|-------------------------|
| <b>Brunei Darussalam</b>        | 77<br>(51 - 109)       | 100.75<br>(66.43 - 142.53)  | 109<br>(73 - 154)      | 101.93<br>(68.14 - 143.47)  | 0.043(0.013 - 0.073)    |
| <b>Bulgaria</b>                 | 1327<br>(880 - 1902)   | 72.06<br>(47.8 - 103.3)     | 691<br>(458 - 992)     | 71.75<br>(47.54 - 102.95)   | -0.009(-0.033 - 0.014)  |
| <b>Burkina Faso</b>             | 2838<br>(1801 - 4165)  | 96.08<br>(60.98 - 141)      | 6936<br>(4489 - 10137) | 96.01<br>(62.13 - 140.32)   | -0.003(-0.004 - -0.001) |
| <b>Burundi</b>                  | 1806<br>(1186 - 2625)  | 107.78<br>(70.78 - 156.63)  | 4150<br>(2720 - 6039)  | 108.28<br>(70.98 - 157.57)  | 0.012(-0.009 - 0.032)   |
| <b>Cabo Verde</b>               | 107<br>(71 - 154)      | 93.46<br>(62.04 - 134.7)    | 142<br>(95 - 206)      | 92.46<br>(61.7 - 133.73)    | -0.037(-0.045 - -0.03)  |
| <b>Cambodia</b>                 | 1674<br>(1090 - 2506)  | 52.32<br>(34.06 - 78.31)    | 2382<br>(1553 - 3590)  | 52.06<br>(33.95 - 78.47)    | -0.017(-0.024 - -0.01)  |
| <b>Cameroon</b>                 | 3091<br>(2025 - 4555)  | 95.95<br>(62.84 - 141.39)   | 9296<br>(6100 - 13731) | 95.91<br>(62.94 - 141.68)   | -0.002(-0.004 - 0)      |
| <b>Canada</b>                   | 8719<br>(6224 - 11113) | 149.58<br>(106.78 - 190.64) | 9664<br>(7049 - 12265) | 152.84<br>(111.49 - 193.98) | 0.072(0.038 - 0.105)    |
| <b>Central African Republic</b> | 864<br>(570 - 1253)    | 101.6<br>(67.02 - 147.4)    | 1786<br>(1178 - 2588)  | 102.04<br>(67.31 - 147.88)  | 0.016(0.003 - 0.028)    |

|                      |                           |                             |                          |                            |                         |
|----------------------|---------------------------|-----------------------------|--------------------------|----------------------------|-------------------------|
| <b>Chad</b>          | 1758<br>(1154 - 2548)     | 96.4<br>(63.27 - 139.68)    | 5187<br>(3397 - 7520)    | 96.66<br>(63.3 - 140.14)   | 0.01(0.007 - 0.013)     |
| <b>Chile</b>         | 5873<br>(3878 - 8342)     | 156.36<br>(103.25 - 222.09) | 6259<br>(4222 - 8843)    | 163.86<br>(110.52 - 231.5) | 0.149(0.101 - 0.198)    |
| <b>China</b>         | 97745<br>(71325 - 128155) | 27<br>(19.7 - 35.4)         | 61826<br>(45262 - 80921) | 27.16<br>(19.88 - 35.54)   | 0.025(-0.006 - 0.055)   |
| <b>Colombia</b>      | 13343<br>(9907 - 17175)   | 130.46<br>(96.86 - 167.92)  | 15216<br>(11211 - 19611) | 128.7<br>(94.83 - 165.88)  | -0.046(-0.058 - -0.035) |
| <b>Comoros</b>       | 163<br>(106 - 242)        | 106.11<br>(68.75 - 157.22)  | 226<br>(149 - 330)       | 105.18<br>(69.39 - 153.58) | -0.031(-0.034 - -0.028) |
| <b>Congo</b>         | 815<br>(532 - 1185)       | 100.38<br>(65.56 - 145.93)  | 1563<br>(1021 - 2271)    | 100.05<br>(65.34 - 145.34) | -0.012(-0.014 - -0.009) |
| <b>Cook Islands</b>  | 2<br>(2 - 4)              | 41.79<br>(26.95 - 61.16)    | 2<br>(1 - 3)             | 41.49<br>(26.8 - 60.95)    | -0.027(-0.058 - 0.003)  |
| <b>Costa Rica</b>    | 1342<br>(907 - 1899)      | 145.77<br>(98.45 - 206.23)  | 1607<br>(1079 - 2291)    | 143.73<br>(96.47 - 204.8)  | -0.049(-0.055 - -0.042) |
| <b>Côte d'Ivoire</b> | 3673<br>(2424 - 5451)     | 95.99<br>(63.36 - 142.47)   | 7773<br>(5132 - 11531)   | 96.3<br>(63.58 - 142.85)   | 0.012(0.008 - 0.016)    |

|                                              |                         |                             |                          |                             |                         |
|----------------------------------------------|-------------------------|-----------------------------|--------------------------|-----------------------------|-------------------------|
| <b>Croatia</b>                               | 844<br>(559 - 1179)     | 81.71<br>(54.15 - 114.19)   | 547<br>(365 - 774)       | 80.75<br>(53.91 - 114.25)   | -0.044(-0.058 - -0.03)  |
| <b>Cuba</b>                                  | 4824<br>(3203 - 6797)   | 156.02<br>(103.61 - 219.86) | 3105<br>(2063 - 4388)    | 156.04<br>(103.68 - 220.53) | 0.002(-0.059 - 0.062)   |
| <b>Cyprus</b>                                | 249<br>(168 - 345)      | 131.11<br>(88.56 - 181.48)  | 274<br>(187 - 385)       | 126.57<br>(86.59 - 177.86)  | -0.122(-0.143 - -0.102) |
| <b>Czechia</b>                               | 1979<br>(1321 - 2806)   | 83.23<br>(55.54 - 118)      | 1242<br>(832 - 1760)     | 81.73<br>(54.75 - 115.77)   | -0.061(-0.082 - -0.039) |
| <b>Democratic People's Republic of Korea</b> | 1511<br>(977 - 2252)    | 27.34<br>(17.69 - 40.75)    | 1488<br>(966 - 2190)     | 27.07<br>(17.57 - 39.83)    | -0.034(-0.05 - -0.018)  |
| <b>Democratic Republic of the Congo</b>      | 12016<br>(7823 - 17495) | 100.04<br>(65.13 - 145.65)  | 29015<br>(18881 - 42250) | 100.13<br>(65.16 - 145.81)  | 0.003(0.002 - 0.005)    |
| <b>Denmark</b>                               | 1490<br>(985 - 2114)    | 136.28<br>(90.1 - 193.36)   | 1439<br>(963 - 2051)     | 134.94<br>(90.34 - 192.32)  | -0.039(-0.079 - 0.001)  |
| <b>Djibouti</b>                              | 177<br>(116 - 261)      | 105.04<br>(69.29 - 155.07)  | 343<br>(226 - 506)       | 104.66<br>(69.02 - 154.29)  | -0.012(-0.057 - 0.033)  |
| <b>Dominica</b>                              | 36<br>(24 - 51)         | 158.83<br>(105.5 - 224.18)  | 26<br>(17 - 37)          | 157.83<br>(105.05 - 222.92) | -0.02(-0.029 - -0.01)   |

|                           |                          |                             |                          |                             |                         |
|---------------------------|--------------------------|-----------------------------|--------------------------|-----------------------------|-------------------------|
| <b>Dominican Republic</b> | 3799<br>(2551 - 5403)    | 159.61<br>(107.16 - 226.99) | 4559<br>(3073 - 6445)    | 157.24<br>(105.96 - 222.27) | -0.051(-0.054 - -0.049) |
| <b>Ecuador</b>            | 5279<br>(3454 - 7617)    | 161.81<br>(105.89 - 233.48) | 7827<br>(5117 - 11344)   | 159.42<br>(104.23 - 231.06) | -0.052(-0.056 - -0.048) |
| <b>Egypt</b>              | 22013<br>(14629 - 30824) | 128.27<br>(85.25 - 179.62)  | 36049<br>(23958 - 50455) | 126.92<br>(84.35 - 177.64)  | -0.038(-0.045 - -0.03)  |
| <b>El Salvador</b>        | 2664<br>(1784 - 3741)    | 149.86<br>(100.37 - 210.41) | 2560<br>(1706 - 3652)    | 145.75<br>(97.1 - 207.89)   | -0.098(-0.111 - -0.085) |
| <b>Equatorial Guinea</b>  | 128<br>(83 - 191)        | 99.77<br>(64.73 - 148.72)   | 528<br>(342 - 786)       | 99.48<br>(64.42 - 148.15)   | -0.009(-0.012 - -0.007) |
| <b>Eritrea</b>            | 1062<br>(705 - 1549)     | 107.51<br>(71.34 - 156.77)  | 2420<br>(1606 - 3525)    | 107.21<br>(71.14 - 156.21)  | -0.01(-0.015 - -0.005)  |
| <b>Estonia</b>            | 265<br>(177 - 386)       | 81.17<br>(54.24 - 118.04)   | 159<br>(107 - 231)       | 80.5<br>(53.95 - 116.83)    | -0.027(-0.041 - -0.013) |
| <b>Eswatini</b>           | 282<br>(183 - 409)       | 102.42<br>(66.44 - 148.73)  | 372<br>(243 - 540)       | 101.61<br>(66.24 - 147.35)  | -0.027(-0.03 - -0.023)  |
| <b>Ethiopia</b>           | 18128<br>(13325 - 23809) | 110.51<br>(81.22 - 145.13)  | 41492<br>(30455 - 54634) | 111.27<br>(81.67 - 146.52)  | 0.023(0.02 - 0.026)     |

|                |                          |                            |                          |                            |                         |
|----------------|--------------------------|----------------------------|--------------------------|----------------------------|-------------------------|
| <b>Fiji</b>    | 100<br>(65 - 146)        | 42.16<br>(27.13 - 61.18)   | 99<br>(64 - 145)         | 42.02<br>(26.97 - 61.22)   | -0.011(-0.015 - -0.008) |
| <b>Finland</b> | 1263<br>(866 - 1765)     | 129.79<br>(88.98 - 181.32) | 1187<br>(820 - 1635)     | 129.38<br>(89.4 - 178.22)  | -0.02(-0.085 - 0.045)   |
| <b>France</b>  | 16466<br>(11225 - 22722) | 130.29<br>(88.82 - 179.8)  | 16185<br>(11053 - 22623) | 133.95<br>(91.48 - 187.23) | 0.096(0.089 - 0.104)    |
| <b>Gabon</b>   | 300<br>(198 - 433)       | 98.38<br>(65.08 - 142.24)  | 521<br>(346 - 758)       | 97.99<br>(65.08 - 142.61)  | -0.014(-0.018 - -0.01)  |
| <b>Gambia</b>  | 296<br>(192 - 436)       | 94.39<br>(61.35 - 139.03)  | 727<br>(471 - 1069)      | 94.82<br>(61.44 - 139.43)  | 0.016(0.014 - 0.019)    |
| <b>Georgia</b> | 1043<br>(691 - 1488)     | 81.22<br>(53.78 - 115.87)  | 504<br>(334 - 718)       | 80.44<br>(53.3 - 114.56)   | -0.033(-0.047 - -0.019) |
| <b>Germany</b> | 15678<br>(11617 - 20459) | 105.27<br>(78 - 137.37)    | 14044<br>(10566 - 18093) | 109.91<br>(82.7 - 141.6)   | 0.158(0.078 - 0.239)    |
| <b>Ghana</b>   | 4468<br>(2936 - 6518)    | 94.77<br>(62.28 - 138.25)  | 9371<br>(6213 - 13613)   | 94.35<br>(62.56 - 137.06)  | -0.015(-0.017 - -0.014) |
| <b>Greece</b>  | 3073<br>(2113 - 4292)    | 131.17<br>(90.18 - 183.2)  | 2055<br>(1387 - 2894)    | 132.48<br>(89.43 - 186.57) | 0.034(0.017 - 0.05)     |

|                      |                       |                             |                        |                             |                         |
|----------------------|-----------------------|-----------------------------|------------------------|-----------------------------|-------------------------|
| <b>Greenland</b>     | 15<br>(10 - 21)       | 107.4<br>(73.13 - 150.84)   | 14<br>(9 - 20)         | 121.88<br>(81.17 - 173.95)  | 0.441(0.382 - 0.5)      |
| <b>Grenada</b>       | 42<br>(28 - 60)       | 160.93<br>(105.37 - 228.74) | 41<br>(27 - 57)        | 155.27<br>(102.5 - 218.92)  | -0.124(-0.136 - -0.113) |
| <b>Guam</b>          | 16<br>(10 - 23)       | 40.87<br>(26.44 - 59.9)     | 17<br>(11 - 25)        | 41.17<br>(26.93 - 60.05)    | 0.025(0.014 - 0.037)    |
| <b>Guatemala</b>     | 3757<br>(2467 - 5391) | 150.83<br>(99.05 - 216.45)  | 8343<br>(5509 - 11812) | 147.71<br>(97.54 - 209.14)  | -0.074(-0.083 - -0.064) |
| <b>Guinea</b>        | 1688<br>(1118 - 2478) | 95.6<br>(63.33 - 140.37)    | 3889<br>(2573 - 5715)  | 95.79<br>(63.37 - 140.75)   | 0.006(-0.006 - 0.017)   |
| <b>Guinea-Bissau</b> | 314<br>(207 - 456)    | 97.04<br>(64.13 - 141.02)   | 606<br>(402 - 885)     | 96.63<br>(64.14 - 141.16)   | -0.014(-0.017 - -0.011) |
| <b>Guyana</b>        | 417<br>(275 - 593)    | 160.78<br>(106.09 - 228.54) | 349<br>(232 - 500)     | 156.93<br>(104.43 - 224.56) | -0.087(-0.113 - -0.061) |
| <b>Haiti</b>         | 3218<br>(2116 - 4609) | 165.88<br>(109.09 - 237.6)  | 6040<br>(3933 - 8590)  | 164.26<br>(106.96 - 233.6)  | -0.034(-0.039 - -0.03)  |
| <b>Honduras</b>      | 2304<br>(1499 - 3275) | 150.35<br>(97.83 - 213.67)  | 4622<br>(3010 - 6589)  | 147.35<br>(95.95 - 210.06)  | -0.07(-0.073 - -0.066)  |

|                                   |                             |                             |                             |                             |                         |
|-----------------------------------|-----------------------------|-----------------------------|-----------------------------|-----------------------------|-------------------------|
| <b>Hungary</b>                    | 1911<br>(1263 - 2763)       | 82.85<br>(54.74 - 119.8)    | 1223<br>(817 - 1746)        | 81.76<br>(54.65 - 116.78)   | -0.047(-0.068 - -0.025) |
| <b>Iceland</b>                    | 81<br>(56 - 115)            | 128.35<br>(88.31 - 181.26)  | 89<br>(61 - 124)            | 130.27<br>(89.99 - 182.44)  | 0.038(-0.023 - 0.1)     |
| <b>India</b>                      | 141368<br>(103864 - 184776) | 54.82<br>(40.28 - 71.65)    | 218692<br>(159646 - 288469) | 55.04<br>(40.18 - 72.6)     | 0.014(0.01 - 0.018)     |
| <b>Indonesia</b>                  | 30810<br>(22541 - 40429)    | 51.8<br>(37.9 - 67.97)      | 35312<br>(25587 - 46324)    | 52.02<br>(37.69 - 68.24)    | 0.015(0.012 - 0.017)    |
| <b>Iran (Islamic Republic of)</b> | 26907<br>(20326 - 34628)    | 140.14<br>(105.87 - 180.36) | 24816<br>(18650 - 32147)    | 140.98<br>(105.95 - 182.62) | 0.014(-0.012 - 0.04)    |
| <b>Iraq</b>                       | 7067<br>(4623 - 10090)      | 124.15<br>(81.21 - 177.25)  | 15866<br>(10515 - 22680)    | 120.17<br>(79.64 - 171.78)  | -0.111(-0.149 - -0.073) |
| <b>Ireland</b>                    | 1016<br>(734 - 1352)        | 104.29<br>(75.39 - 138.83)  | 989<br>(721 - 1314)         | 103.66<br>(75.62 - 137.8)   | -0.021(-0.059 - 0.017)  |
| <b>Israel</b>                     | 2152<br>(1467 - 3059)       | 158.23<br>(107.87 - 224.9)  | 3413<br>(2328 - 4800)       | 157.58<br>(107.48 - 221.64) | -0.016(-0.03 - -0.001)  |
| <b>Italy</b>                      | 14971<br>(11205 - 19257)    | 119.59<br>(89.5 - 153.83)   | 10893<br>(8243 - 13887)     | 125.01<br>(94.59 - 159.36)  | 0.153(0.128 - 0.178)    |

|                                             |                          |                            |                          |                             |                         |
|---------------------------------------------|--------------------------|----------------------------|--------------------------|-----------------------------|-------------------------|
| <b>Jamaica</b>                              | 1227<br>(823 - 1727)     | 160.6<br>(107.77 - 226.07) | 1156<br>(776 - 1629)     | 156.19<br>(104.84 - 220.03) | -0.096(-0.101 - -0.09)  |
| <b>Japan</b>                                | 29054<br>(21864 - 37646) | 103.38<br>(77.8 - 133.95)  | 17566<br>(13104 - 22781) | 99.23<br>(74.03 - 128.7)    | -0.136(-0.158 - -0.114) |
| <b>Jordan</b>                               | 1838<br>(1223 - 2612)    | 134.45<br>(89.45 - 190.99) | 4729<br>(3148 - 6734)    | 133.47<br>(88.85 - 190.05)  | -0.023(-0.074 - 0.029)  |
| <b>Kazakhstan</b>                           | 3610<br>(2417 - 5256)    | 82.65<br>(55.34 - 120.33)  | 3192<br>(2137 - 4646)    | 81.69<br>(54.68 - 118.89)   | -0.046(-0.075 - -0.018) |
| <b>Kenya</b>                                | 8432<br>(6219 - 10993)   | 106.4<br>(78.47 - 138.71)  | 18351<br>(13547 - 24100) | 107.03<br>(79.01 - 140.56)  | 0.021(0.017 - 0.026)    |
| <b>Kiribati</b>                             | 10<br>(6 - 14)           | 44.08<br>(28.69 - 64.68)   | 15<br>(10 - 22)          | 44.21<br>(28.54 - 64.48)    | 0.011(0.001 - 0.02)     |
| <b>Kuwait</b>                               | 616<br>(414 - 866)       | 129.9<br>(87.37 - 182.77)  | 1041<br>(700 - 1463)     | 129.72<br>(87.27 - 182.31)  | -0.004(-0.05 - 0.043)   |
| <b>Kyrgyzstan</b>                           | 1062<br>(705 - 1522)     | 82.2<br>(54.54 - 117.72)   | 1373<br>(913 - 1977)     | 80.88<br>(53.8 - 116.51)    | -0.058(-0.067 - -0.048) |
| <b>Lao People's<br/>Democratic Republic</b> | 705<br>(459 - 1028)      | 54.44<br>(35.48 - 79.4)    | 1137<br>(741 - 1676)     | 54<br>(35.17 - 79.58)       | -0.027(-0.035 - -0.018) |

|                   |                       |                             |                        |                             |                         |
|-------------------|-----------------------|-----------------------------|------------------------|-----------------------------|-------------------------|
| <b>Latvia</b>     | 439<br>(284 - 639)    | 81.25<br>(52.57 - 118.35)   | 223<br>(145 - 319)     | 81.23<br>(52.72 - 116.5)    | -0.001(-0.016 - 0.013)  |
| <b>Lebanon</b>    | 1559<br>(1143 - 2075) | 166.12<br>(121.81 - 221.18) | 1796<br>(1319 - 2386)  | 162.67<br>(119.49 - 216.15) | -0.07(-0.1 - -0.039)    |
| <b>Lesotho</b>    | 614<br>(405 - 895)    | 102.85<br>(67.75 - 149.83)  | 666<br>(444 - 974)     | 102.15<br>(68 - 149.25)     | -0.024(-0.036 - -0.012) |
| <b>Liberia</b>    | 561<br>(364 - 807)    | 96.94<br>(62.89 - 139.58)   | 1512<br>(1002 - 2195)  | 95.25<br>(63.12 - 138.3)    | -0.059(-0.091 - -0.027) |
| <b>Libya</b>      | 1945<br>(1289 - 2792) | 136.04<br>(90.11 - 195.27)  | 2274<br>(1512 - 3216)  | 131.41<br>(87.39 - 185.82)  | -0.116(-0.14 - -0.092)  |
| <b>Lithuania</b>  | 664<br>(441 - 957)    | 81.12<br>(53.87 - 117)      | 346<br>(230 - 497)     | 80.04<br>(53.14 - 114.81)   | -0.045(-0.053 - -0.038) |
| <b>Luxembourg</b> | 89<br>(62 - 126)      | 123.65<br>(85.28 - 174.42)  | 134<br>(91 - 187)      | 128.09<br>(86.96 - 178.51)  | 0.117(0.085 - 0.149)    |
| <b>Madagascar</b> | 4100<br>(2655 - 5981) | 107.05<br>(69.33 - 156.17)  | 9400<br>(6108 - 13718) | 106.73<br>(69.35 - 155.75)  | -0.01(-0.012 - -0.009)  |
| <b>Malawi</b>     | 3313<br>(2150 - 4763) | 108.54<br>(70.45 - 156.05)  | 7290<br>(4736 - 10476) | 109.7<br>(71.27 - 157.64)   | 0.039(0.01 - 0.067)     |

|                                             |                          |                             |                          |                             |                         |
|---------------------------------------------|--------------------------|-----------------------------|--------------------------|-----------------------------|-------------------------|
| <b>Malaysia</b>                             | 2723<br>(1761 - 3977)    | 50.61<br>(32.73 - 73.93)    | 4099<br>(2676 - 5955)    | 50.2<br>(32.77 - 72.93)     | -0.028(-0.038 - -0.018) |
| <b>Maldives</b>                             | 36<br>(24 - 53)          | 50.7<br>(33.13 - 74.41)     | 50<br>(33 - 73)          | 49.06<br>(32.27 - 71.43)    | -0.113(-0.134 - -0.092) |
| <b>Mali</b>                                 | 2431<br>(1568 - 3519)    | 95.55<br>(61.64 - 138.32)   | 6998<br>(4515 - 10184)   | 95.9<br>(61.88 - 139.56)    | 0.013(0.009 - 0.016)    |
| <b>Malta</b>                                | 112<br>(75 - 160)        | 136.4<br>(92.12 - 195.18)   | 84<br>(57 - 116)         | 127.5<br>(87.05 - 177.16)   | -0.241(-0.274 - -0.208) |
| <b>Marshall Islands</b>                     | 7<br>(4 - 10)            | 43.21<br>(28.01 - 64.48)    | 7<br>(5 - 10)            | 43.16<br>(28.33 - 63.76)    | -0.003(-0.009 - 0.002)  |
| <b>Mauritania</b>                           | 596<br>(386 - 858)       | 93.68<br>(60.72 - 134.8)    | 1265<br>(820 - 1820)     | 93.9<br>(60.87 - 135.15)    | 0.008(0.006 - 0.01)     |
| <b>Mauritius</b>                            | 162<br>(106 - 239)       | 49.82<br>(32.69 - 73.47)    | 135<br>(87 - 198)        | 50.14<br>(32.44 - 73.86)    | 0.022(0.007 - 0.038)    |
| <b>Mexico</b>                               | 47542<br>(35800 - 61716) | 163.36<br>(123.01 - 212.06) | 52495<br>(39374 - 68112) | 160.86<br>(120.65 - 208.71) | -0.054(-0.057 - -0.05)  |
| <b>Micronesia<br/>(Federated States of)</b> | 15<br>(10 - 22)          | 43.79<br>(28.15 - 64.69)    | 14<br>(9 - 21)           | 43.59<br>(27.94 - 64.91)    | -0.016(-0.019 - -0.014) |

|                   |                         |                            |                         |                            |                         |
|-------------------|-------------------------|----------------------------|-------------------------|----------------------------|-------------------------|
| <b>Monaco</b>     | 5<br>(4 - 7)            | 121.81<br>(83.91 - 171.2)  | 7<br>(5 - 10)           | 131.96<br>(91.07 - 183.08) | 0.297(0.228 - 0.367)    |
| <b>Mongolia</b>   | 587<br>(383 - 849)      | 83.05<br>(54.26 - 120.24)  | 595<br>(391 - 866)      | 81.55<br>(53.61 - 118.72)  | -0.061(-0.089 - -0.033) |
| <b>Montenegro</b> | 130<br>(87 - 186)       | 82.19<br>(54.97 - 117.56)  | 98<br>(65 - 140)        | 82.04<br>(54.57 - 116.84)  | -0.007(-0.013 - -0.002) |
| <b>Morocco</b>    | 10910<br>(7312 - 15766) | 134.56<br>(90.18 - 194.47) | 12342<br>(8277 - 17688) | 132.71<br>(89 - 190.19)    | -0.048(-0.052 - -0.044) |
| <b>Mozambique</b> | 4455<br>(2935 - 6473)   | 109.22<br>(71.95 - 158.69) | 10732<br>(7101 - 15549) | 108.66<br>(71.9 - 157.44)  | -0.021(-0.041 - -0.001) |
| <b>Myanmar</b>    | 6746<br>(4363 - 9988)   | 52.6<br>(34.02 - 77.88)    | 7688<br>(4981 - 11378)  | 52.59<br>(34.07 - 77.83)   | 0(-0.002 - 0.001)       |
| <b>Namibia</b>    | 476<br>(313 - 699)      | 100.23<br>(65.93 - 147.37) | 725<br>(476 - 1061)     | 99.33<br>(65.22 - 145.4)   | -0.031(-0.034 - -0.028) |
| <b>Nauru</b>      | 1<br>(1 - 2)            | 43.54<br>(28.01 - 64.13)   | 1<br>(1 - 2)            | 43.68<br>(28.08 - 63.8)    | 0.011(0.008 - 0.015)    |
| <b>Nepal</b>      | 3602<br>(2323 - 5362)   | 60.53<br>(39.04 - 90.1)    | 5767<br>(3753 - 8497)   | 60.37<br>(39.29 - 88.95)   | -0.009(-0.012 - -0.006) |

|                                 |                          |                             |                          |                            |                         |
|---------------------------------|--------------------------|-----------------------------|--------------------------|----------------------------|-------------------------|
| <b>Netherlands</b>              | 3732<br>(3032 - 4467)    | 113.91<br>(92.56 - 136.36)  | 3608<br>(2938 - 4314)    | 118.83<br>(96.76 - 142.1)  | 0.15(0.128 - 0.172)     |
| <b>New Zealand</b>              | 2408<br>(1809 - 3072)    | 286.15<br>(214.88 - 365.01) | 2584<br>(1942 - 3309)    | 291.86<br>(219.4 - 373.85) | 0.069(0.047 - 0.091)    |
| <b>Nicaragua</b>                | 1948<br>(1313 - 2760)    | 148.81<br>(100.27 - 210.85) | 2766<br>(1858 - 3911)    | 145.43<br>(97.67 - 205.62) | -0.08(-0.083 - -0.076)  |
| <b>Niger</b>                    | 2344<br>(1545 - 3451)    | 95.86<br>(63.2 - 141.13)    | 7410<br>(4883 - 10903)   | 96.11<br>(63.33 - 141.41)  | 0.009(0.004 - 0.013)    |
| <b>Nigeria</b>                  | 26622<br>(19713 - 34912) | 94.56<br>(70.02 - 124)      | 68704<br>(50927 - 89659) | 94.65<br>(70.16 - 123.52)  | 0.003(0.002 - 0.005)    |
| <b>Niue</b>                     | 0<br>(0 - 0)             | 42.33<br>(27.37 - 61.64)    | 0<br>(0 - 0)             | 42.36<br>(27.31 - 61.24)   | -0.004(-0.027 - 0.019)  |
| <b>North Macedonia</b>          | 426<br>(282 - 610)       | 82.15<br>(54.3 - 117.49)    | 309<br>(204 - 442)       | 81.01<br>(53.61 - 116.07)  | -0.056(-0.098 - -0.014) |
| <b>Northern Mariana Islands</b> | 5<br>(3 - 8)             | 41.09<br>(26.77 - 60.12)    | 4<br>(3 - 7)             | 42.56<br>(27.47 - 62.29)   | 0.153(-0.063 - 0.369)   |
| <b>Norway</b>                   | 1071<br>(805 - 1375)     | 116.82<br>(87.81 - 149.96)  | 1145<br>(866 - 1468)     | 116.58<br>(88.23 - 149.48) | -0.011(-0.034 - 0.012)  |

|                         |                          |                             |                          |                             |                         |
|-------------------------|--------------------------|-----------------------------|--------------------------|-----------------------------|-------------------------|
| <b>Oman</b>             | 652<br>(450 - 900)       | 118.82<br>(82.05 - 163.91)  | 1059<br>(722 - 1462)     | 111.67<br>(76.15 - 154.12)  | -0.236(-0.323 - -0.149) |
| <b>Pakistan</b>         | 22000<br>(16208 - 28760) | 61.63<br>(45.4 - 80.56)     | 45225<br>(33340 - 59094) | 61.62<br>(45.43 - 80.52)    | 0(-0.001 - 0.002)       |
| <b>Palau</b>            | 2<br>(1 - 3)             | 42.59<br>(27.22 - 63.54)    | 2<br>(1 - 2)             | 42.39<br>(27.04 - 63.48)    | -0.018(-0.032 - -0.004) |
| <b>Palestine</b>        | 923<br>(618 - 1323)      | 136.33<br>(91.27 - 195.5)   | 2161<br>(1445 - 3064)    | 134.21<br>(89.72 - 190.28)  | -0.054(-0.062 - -0.046) |
| <b>Panama</b>           | 1096<br>(733 - 1572)     | 145.34<br>(97.21 - 208.47)  | 1543<br>(1039 - 2199)    | 143.93<br>(96.87 - 205.12)  | -0.034(-0.046 - -0.023) |
| <b>Papua New Guinea</b> | 570<br>(363 - 851)       | 43.58<br>(27.76 - 65.06)    | 1267<br>(805 - 1896)     | 43.41<br>(27.6 - 64.98)     | -0.013(-0.016 - -0.011) |
| <b>Paraguay</b>         | 2458<br>(1617 - 3477)    | 199.39<br>(131.18 - 282.01) | 3792<br>(2521 - 5335)    | 194.36<br>(129.23 - 273.45) | -0.089(-0.097 - -0.08)  |
| <b>Peru</b>             | 11245<br>(7500 - 16195)  | 159.81<br>(106.59 - 230.16) | 13627<br>(9107 - 19373)  | 156.98<br>(104.92 - 223.19) | -0.062(-0.066 - -0.058) |
| <b>Philippines</b>      | 10624<br>(7746 - 13941)  | 51.78<br>(37.75 - 67.95)    | 16592<br>(12060 - 21781) | 51.76<br>(37.62 - 67.94)    | -0.001(-0.007 - 0.005)  |

|                            |                          |                            |                          |                             |                         |
|----------------------------|--------------------------|----------------------------|--------------------------|-----------------------------|-------------------------|
| <b>Poland</b>              | 7143<br>(5322 - 9301)    | 83.15<br>(61.94 - 108.27)  | 4825<br>(3541 - 6309)    | 82.2<br>(60.32 - 107.49)    | -0.041(-0.056 - -0.026) |
| <b>Portugal</b>            | 3348<br>(2434 - 4483)    | 134.27<br>(97.61 - 179.76) | 2196<br>(1617 - 2889)    | 131.55<br>(96.88 - 173.1)   | -0.072(-0.093 - -0.052) |
| <b>Puerto Rico</b>         | 1585<br>(1045 - 2245)    | 161.33<br>(106.4 - 228.58) | 1068<br>(717 - 1502)     | 158.62<br>(106.48 - 223.05) | -0.055(-0.07 - -0.04)   |
| <b>Qatar</b>               | 126<br>(83 - 181)        | 127.42<br>(83.69 - 182.71) | 580<br>(375 - 845)       | 113.65<br>(73.49 - 165.74)  | -0.4(-0.435 - -0.366)   |
| <b>Republic of Korea</b>   | 10494<br>(7026 - 14828)  | 79.77<br>(53.41 - 112.71)  | 6546<br>(4425 - 9131)    | 78.15<br>(52.83 - 109.02)   | -0.068(-0.12 - -0.016)  |
| <b>Republic of Moldova</b> | 840<br>(543 - 1217)      | 81.64<br>(52.82 - 118.28)  | 491<br>(321 - 710)       | 80.45<br>(52.69 - 116.32)   | -0.053(-0.067 - -0.039) |
| <b>Romania</b>             | 6005<br>(4182 - 8209)    | 101.63<br>(70.78 - 138.93) | 3173<br>(2212 - 4351)    | 101.9<br>(71.03 - 139.74)   | 0.025(-0.055 - 0.104)   |
| <b>Russian Federation</b>  | 25905<br>(18965 - 33880) | 82.23<br>(60.2 - 107.55)   | 18644<br>(13706 - 24327) | 81.76<br>(60.11 - 106.68)   | -0.026(-0.048 - -0.005) |
| <b>Rwanda</b>              | 2427<br>(1589 - 3538)    | 107.37<br>(70.33 - 156.55) | 4492<br>(2950 - 6575)    | 107.12<br>(70.34 - 156.77)  | -0.008(-0.028 - 0.013)  |

|                                         |                        |                             |                         |                             |                         |
|-----------------------------------------|------------------------|-----------------------------|-------------------------|-----------------------------|-------------------------|
| <b>Saint Kitts and Nevis</b>            | 20<br>(13 - 29)        | 160.18<br>(104.79 - 227.54) | 21<br>(14 - 30)         | 158.04<br>(103.2 - 224.54)  | -0.046(-0.049 - -0.044) |
| <b>Saint Lucia</b>                      | 73<br>(48 - 104)       | 160.41<br>(105.01 - 230.35) | 62<br>(41 - 89)         | 156.79<br>(103.69 - 225.36) | -0.079(-0.085 - -0.073) |
| <b>Saint Vincent and the Grenadines</b> | 60<br>(40 - 86)        | 161.17<br>(106.61 - 230.13) | 43<br>(28 - 60)         | 158.37<br>(104.88 - 223.65) | -0.062(-0.068 - -0.055) |
| <b>Samoa</b>                            | 25<br>(16 - 37)        | 42.54<br>(27.17 - 62.75)    | 29<br>(19 - 43)         | 42.58<br>(27.2 - 62.75)     | 0.004(0.001 - 0.006)    |
| <b>San Marino</b>                       | 7<br>(5 - 10)          | 129.86<br>(88.9 - 181.59)   | 8<br>(5 - 11)           | 131.51<br>(89.49 - 183.59)  | 0.045(0.036 - 0.054)    |
| <b>Sao Tome and Principe</b>            | 38<br>(25 - 56)        | 93.95<br>(61.41 - 137.61)   | 63<br>(41 - 92)         | 93.8<br>(61.27 - 136.69)    | -0.006(-0.009 - -0.002) |
| <b>Saudi Arabia</b>                     | 7165<br>(4728 - 10282) | 140.87<br>(92.95 - 202.16)  | 11001<br>(7302 - 15623) | 132.87<br>(88.2 - 188.7)    | -0.201(-0.214 - -0.189) |
| <b>Senegal</b>                          | 2288<br>(1481 - 3340)  | 94.59<br>(61.23 - 138.09)   | 4720<br>(3044 - 6883)   | 94.38<br>(60.86 - 137.62)   | -0.008(-0.009 - -0.007) |
| <b>Serbia</b>                           | 1731<br>(1148 - 2488)  | 82.65<br>(54.8 - 118.81)    | 1288<br>(853 - 1871)    | 81.97<br>(54.29 - 119.06)   | -0.031(-0.059 - -0.002) |

|                        |                         |                            |                          |                            |                         |
|------------------------|-------------------------|----------------------------|--------------------------|----------------------------|-------------------------|
| <b>Seychelles</b>      | 11<br>(7 - 17)          | 50.43<br>(33.49 - 73.98)   | 11<br>(7 - 16)           | 50<br>(33.29 - 73.94)      | -0.03(-0.032 - -0.027)  |
| <b>Sierra Leone</b>    | 1021<br>(674 - 1498)    | 95.32<br>(62.9 - 139.87)   | 2629<br>(1740 - 3858)    | 95.6<br>(63.27 - 140.29)   | 0.01(-0.04 - 0.06)      |
| <b>Singapore</b>       | 964<br>(668 - 1320)     | 116.95<br>(81.03 - 160.13) | 905<br>(618 - 1255)      | 120.6<br>(82.35 - 167.26)  | 0.077(-0.048 - 0.202)   |
| <b>Slovakia</b>        | 1054<br>(707 - 1515)    | 82.76<br>(55.55 - 119.01)  | 683<br>(456 - 981)       | 81.15<br>(54.19 - 116.62)  | -0.071(-0.077 - -0.064) |
| <b>Slovenia</b>        | 362<br>(241 - 517)      | 81.65<br>(54.45 - 116.68)  | 237<br>(158 - 338)       | 81.43<br>(54.33 - 116.35)  | -0.007(-0.041 - 0.028)  |
| <b>Solomon Islands</b> | 52<br>(33 - 77)         | 45.09<br>(28.59 - 66.66)   | 91<br>(58 - 135)         | 44.93<br>(28.6 - 66.82)    | -0.011(-0.017 - -0.006) |
| <b>Somalia</b>         | 2519<br>(1630 - 3646)   | 109.97<br>(71.14 - 159.13) | 7414<br>(4912 - 10677)   | 108.24<br>(71.71 - 155.88) | -0.059(-0.073 - -0.045) |
| <b>South Africa</b>    | 11997<br>(8898 - 15835) | 100.6<br>(74.61 - 132.78)  | 14019<br>(10335 - 18538) | 99.95<br>(73.69 - 132.17)  | -0.023(-0.026 - -0.02)  |
| <b>South Sudan</b>     | 2120<br>(1387 - 3044)   | 106.01<br>(69.33 - 152.21) | 3475<br>(2277 - 4985)    | 107.49<br>(70.43 - 154.17) | 0.05(0.041 - 0.059)     |

|                                   |                         |                             |                          |                             |                         |
|-----------------------------------|-------------------------|-----------------------------|--------------------------|-----------------------------|-------------------------|
| <b>Spain</b>                      | 12999<br>(8946 - 18227) | 133.45<br>(91.84 - 187.13)  | 9425<br>(6433 - 13190)   | 136.37<br>(93.08 - 190.84)  | 0.072(0.048 - 0.095)    |
| <b>Sri Lanka</b>                  | 2628<br>(1732 - 3793)   | 50.7<br>(33.41 - 73.18)     | 2621<br>(1724 - 3786)    | 50.84<br>(33.43 - 73.44)    | 0.009(-0.001 - 0.019)   |
| <b>Sudan</b>                      | 8801<br>(5698 - 12618)  | 136.4<br>(88.31 - 195.55)   | 18157<br>(11744 - 26026) | 135<br>(87.32 - 193.5)      | -0.033(-0.062 - -0.003) |
| <b>Suriname</b>                   | 189<br>(124 - 271)      | 156.93<br>(102.84 - 224.35) | 224<br>(147 - 321)       | 157.89<br>(103.63 - 226.05) | 0.029(-0.002 - 0.06)    |
| <b>Sweden</b>                     | 2254<br>(1679 - 2918)   | 136.16<br>(101.41 - 176.28) | 2404<br>(1824 - 3095)    | 139.19<br>(105.61 - 179.17) | 0.076(0.04 - 0.111)     |
| <b>Switzerland</b>                | 1706<br>(1148 - 2399)   | 128.27<br>(86.34 - 180.44)  | 1807<br>(1235 - 2522)    | 133.4<br>(91.22 - 186.26)   | 0.133(0.106 - 0.161)    |
| <b>Syrian Arab Republic</b>       | 5945<br>(3812 - 8617)   | 136.38<br>(87.45 - 197.68)  | 6673<br>(4321 - 9694)    | 136.81<br>(88.58 - 198.74)  | 0.011(-0.039 - 0.061)   |
| <b>Taiwan (Province of China)</b> | 1521<br>(995 - 2235)    | 26.6<br>(17.4 - 39.09)      | 988<br>(637 - 1449)      | 26.18<br>(16.88 - 38.4)     | -0.057(-0.106 - -0.007) |
| <b>Tajikistan</b>                 | 1366<br>(890 - 1968)    | 82.36<br>(53.66 - 118.71)   | 2197<br>(1437 - 3161)    | 81.44<br>(53.26 - 117.15)   | -0.035(-0.05 - -0.02)   |

|                            |                          |                             |                          |                             |                         |
|----------------------------|--------------------------|-----------------------------|--------------------------|-----------------------------|-------------------------|
| <b>Thailand</b>            | 9091<br>(5990 - 13458)   | 50.83<br>(33.49 - 75.25)    | 6622<br>(4357 - 9734)    | 50.46<br>(33.2 - 74.18)     | -0.027(-0.04 - -0.015)  |
| <b>Timor-Leste</b>         | 114<br>(74 - 166)        | 49.5<br>(32.03 - 72.23)     | 229<br>(147 - 335)       | 50.24<br>(32.27 - 73.47)    | 0.052(0.049 - 0.056)    |
| <b>Togo</b>                | 1138<br>(745 - 1658)     | 95.4<br>(62.46 - 139.02)    | 2349<br>(1534 - 3430)    | 95.14<br>(62.11 - 138.92)   | -0.01(-0.012 - -0.007)  |
| <b>Tokelau</b>             | 0<br>(0 - 0)             | 42.42<br>(27.66 - 63.28)    | 0<br>(0 - 0)             | 42.21<br>(27.59 - 62.17)    | -0.016(-0.073 - 0.041)  |
| <b>Tonga</b>               | 14<br>(9 - 21)           | 41.96<br>(26.86 - 62.37)    | 13<br>(8 - 19)           | 41.82<br>(26.76 - 62.02)    | -0.011(-0.013 - -0.008) |
| <b>Trinidad and Tobago</b> | 547<br>(365 - 771)       | 159.18<br>(106.15 - 224.55) | 430<br>(286 - 603)       | 157.75<br>(104.99 - 221.44) | -0.036(-0.061 - -0.011) |
| <b>Tunisia</b>             | 3595<br>(2395 - 5130)    | 134.47<br>(89.58 - 191.92)  | 3291<br>(2195 - 4676)    | 132.5<br>(88.37 - 188.29)   | -0.05(-0.062 - -0.039)  |
| <b>Turkey</b>              | 25776<br>(17358 - 36640) | 135.69<br>(91.37 - 192.87)  | 25021<br>(16810 - 35235) | 131.49<br>(88.34 - 185.18)  | -0.111(-0.118 - -0.104) |
| <b>Turkmenistan</b>        | 945<br>(624 - 1378)      | 82.26<br>(54.32 - 119.94)   | 1020<br>(675 - 1477)     | 81.3<br>(53.82 - 117.77)    | -0.041(-0.048 - -0.034) |

|                                     |                          |                             |                          |                             |                         |
|-------------------------------------|--------------------------|-----------------------------|--------------------------|-----------------------------|-------------------------|
| <b>Tuvalu</b>                       | 1<br>(1 - 2)             | 42.85<br>(27.28 - 62.94)    | 1<br>(1 - 2)             | 43.05<br>(27.41 - 63.32)    | 0.016(0.009 - 0.024)    |
| <b>Uganda</b>                       | 6135<br>(4018 - 8918)    | 108.52<br>(71.08 - 157.75)  | 15656<br>(10211 - 22803) | 108.73<br>(70.91 - 158.37)  | 0.007(0.004 - 0.011)    |
| <b>Ukraine</b>                      | 8922<br>(6461 - 11596)   | 82.33<br>(59.62 - 107)      | 5373<br>(3899 - 6990)    | 81.41<br>(59.08 - 105.92)   | -0.042(-0.055 - -0.029) |
| <b>United Arab Emirates</b>         | 538<br>(354 - 764)       | 127.61<br>(83.91 - 181.05)  | 1416<br>(934 - 2015)     | 133.72<br>(88.21 - 190.29)  | 0.181(0.027 - 0.336)    |
| <b>United Kingdom</b>               | 18415<br>(13847 - 23623) | 155.59<br>(116.99 - 199.59) | 18774<br>(14195 - 23971) | 159.43<br>(120.54 - 203.56) | 0.081(0.061 - 0.102)    |
| <b>United Republic of Tanzania</b>  | 9166<br>(5991 - 13251)   | 107.62<br>(70.34 - 155.58)  | 19693<br>(12862 - 28481) | 107.35<br>(70.11 - 155.24)  | -0.009(-0.01 - -0.007)  |
| <b>United States of America</b>     | 65046<br>(57041 - 72849) | 118.03<br>(103.5 - 132.19)  | 78540<br>(68795 - 88110) | 121.51<br>(106.44 - 136.32) | 0.102(0.07 - 0.134)     |
| <b>United States Virgin Islands</b> | 46<br>(31 - 65)          | 162.77<br>(108.55 - 231.54) | 31<br>(21 - 44)          | 160.51<br>(107.48 - 227.56) | -0.047(-0.063 - -0.031) |
| <b>Uruguay</b>                      | 1221<br>(813 - 1722)     | 159.29<br>(106.08 - 224.66) | 1233<br>(837 - 1753)     | 165.87<br>(112.58 - 235.88) | 0.129(0.087 - 0.171)    |

|                                           |                         |                            |                         |                            |                         |
|-------------------------------------------|-------------------------|----------------------------|-------------------------|----------------------------|-------------------------|
| <b>Uzbekistan</b>                         | 5253<br>(3481 - 7724)   | 82.19<br>(54.46 - 120.85)  | 7274<br>(4828 - 10651)  | 81.27<br>(53.94 - 118.99)  | -0.039(-0.046 - -0.033) |
| <b>Vanuatu</b>                            | 20<br>(13 - 30)         | 43.24<br>(27.89 - 63.17)   | 39<br>(25 - 57)         | 43.05<br>(27.8 - 63.32)    | -0.016(-0.021 - -0.01)  |
| <b>Venezuela (Bolivarian Republic of)</b> | 8804<br>(5738 - 12466)  | 146.86<br>(95.72 - 207.95) | 9841<br>(6454 - 13926)  | 146.73<br>(96.23 - 207.65) | 0.008(-0.037 - 0.054)   |
| <b>Viet Nam</b>                           | 10973<br>(7174 - 16016) | 50.91<br>(33.29 - 74.31)   | 10605<br>(6942 - 15682) | 50.28<br>(32.92 - 74.36)   | -0.042(-0.057 - -0.027) |
| <b>Yemen</b>                              | 5858<br>(3772 - 8377)   | 138.73<br>(89.33 - 198.38) | 13989<br>(9059 - 19831) | 137.64<br>(89.13 - 195.12) | -0.026(-0.037 - -0.014) |
| <b>Zambia</b>                             | 3053<br>(1997 - 4463)   | 110.09<br>(72.01 - 160.92) | 6740<br>(4407 - 9869)   | 109.47<br>(71.57 - 160.3)  | -0.02(-0.023 - -0.017)  |
| <b>Zimbabwe</b>                           | 3642<br>(2371 - 5382)   | 101.47<br>(66.05 - 149.95) | 4954<br>(3237 - 7337)   | 101.14<br>(66.08 - 149.8)  | -0.011(-0.014 - -0.007) |

**Supplement table S5: The years lived with disability (YLDs) of bipolar disorder aged 10-24 years and its average annual percentage change (AAPC) from 1990 to 2019 at 204 countries level.**

| Location                   | 1990                    |                              | 2019                     |                              | AAPC<br>(95% CI)       |
|----------------------------|-------------------------|------------------------------|--------------------------|------------------------------|------------------------|
|                            | Case (95% UI)           | Rate (per 100000 population) | Case (95% UI)            | Rate (per 100000 population) |                        |
| <b>Afghanistan</b>         | 6099<br>(3101 - 10900)  | 160.79<br>(81.76 - 287.39)   | 21126<br>(10487 - 35911) | 162.54<br>(80.69 - 276.3)    | 0.029(-0.044 - 0.103)  |
| <b>Albania</b>             | 1046<br>(526 - 1800)    | 105.17<br>(52.91 - 181.09)   | 657<br>(331 - 1119)      | 115.94<br>(58.41 - 197.54)   | 0.349(0.248 - 0.45)    |
| <b>Algeria</b>             | 14403<br>(7240 - 24703) | 168.76<br>(84.83 - 289.44)   | 16993<br>(8393 - 28891)  | 173.89<br>(85.88 - 295.63)   | 0.107(0.067 - 0.148)   |
| <b>American Samoa</b>      | 8<br>(4 - 14)           | 51.96<br>(25.12 - 91.12)     | 9<br>(4 - 16)            | 51.75<br>(24.48 - 91.19)     | 0(-0.067 - 0.066)      |
| <b>Andorra</b>             | 27<br>(13 - 45)         | 219.26<br>(109.7 - 370.37)   | 27<br>(14 - 46)          | 212.77<br>(109.52 - 363.89)  | -0.115(-0.243 - 0.012) |
| <b>Angola</b>              | 3483<br>(1763 - 5998)   | 108.57<br>(54.97 - 186.97)   | 10367<br>(5112 - 17683)  | 107.68<br>(53.09 - 183.65)   | -0.035(-0.074 - 0.003) |
| <b>Antigua and Barbuda</b> | 38<br>(19 - 64)         | 215.47<br>(109.16 - 369.2)   | 45<br>(23 - 76)          | 223.2<br>(111.71 - 376.06)   | 0.113(0.078 - 0.149)   |

|                   |                          |                             |                          |                             |                         |
|-------------------|--------------------------|-----------------------------|--------------------------|-----------------------------|-------------------------|
| <b>Argentina</b>  | 19290<br>(9998 - 33350)  | 221.29<br>(114.69 - 382.6)  | 26995<br>(14109 - 45331) | 253.58<br>(132.53 - 425.83) | 0.478(0.387 - 0.569)    |
| <b>Armenia</b>    | 934<br>(470 - 1580)      | 107.22<br>(54 - 181.41)     | 596<br>(294 - 1004)      | 109.35<br>(54.04 - 184.23)  | 0.07(-0.045 - 0.186)    |
| <b>Australia</b>  | 11905<br>(6723 - 19178)  | 299.85<br>(169.32 - 483.04) | 13564<br>(7746 - 21761)  | 298.72<br>(170.6 - 479.25)  | -0.012(-0.046 - 0.021)  |
| <b>Austria</b>    | 3539<br>(1851 - 5950)    | 217.82<br>(113.94 - 366.19) | 2993<br>(1512 - 5048)    | 211.42<br>(106.82 - 356.54) | -0.107(-0.131 - -0.083) |
| <b>Azerbaijan</b> | 2234<br>(1102 - 3827)    | 105.55<br>(52.05 - 180.75)  | 2349<br>(1178 - 4096)    | 106.6<br>(53.44 - 185.84)   | 0.031(-0.081 - 0.142)   |
| <b>Bahamas</b>    | 171<br>(87 - 291)        | 211.5<br>(107.09 - 359.52)  | 197<br>(100 - 336)       | 211.17<br>(107.53 - 360.77) | -0.008(-0.066 - 0.05)   |
| <b>Bahrain</b>    | 237<br>(122 - 405)       | 182.81<br>(94.61 - 312.69)  | 457<br>(239 - 780)       | 184.34<br>(96.43 - 314.22)  | 0.036(-0.201 - 0.274)   |
| <b>Bangladesh</b> | 24358<br>(11922 - 41741) | 69.22<br>(33.88 - 118.61)   | 33286<br>(16112 - 57936) | 73.45<br>(35.55 - 127.85)   | 0.204(0.159 - 0.248)    |
| <b>Barbados</b>   | 146<br>(75 - 250)        | 216.7<br>(111.22 - 370.62)  | 124<br>(63 - 216)        | 216.87<br>(109.53 - 376.03) | -0.001(-0.034 - 0.032)  |

|                                         |                       |                             |                        |                             |                        |
|-----------------------------------------|-----------------------|-----------------------------|------------------------|-----------------------------|------------------------|
| <b>Belarus</b>                          | 2339<br>(1186 - 3994) | 105.48<br>(53.5 - 180.16)   | 1482<br>(747 - 2572)   | 105.12<br>(53 - 182.45)     | -0.013(-0.093 - 0.068) |
| <b>Belgium</b>                          | 4229<br>(2160 - 7099) | 210.11<br>(107.3 - 352.73)  | 3951<br>(2058 - 6636)  | 203.67<br>(106.12 - 342.13) | -0.098(-0.14 - -0.056) |
| <b>Belize</b>                           | 124<br>(62 - 210)     | 198.1<br>(99.35 - 335.99)   | 269<br>(139 - 451)     | 208.79<br>(107.94 - 349.92) | 0.181(0.158 - 0.203)   |
| <b>Benin</b>                            | 1487<br>(738 - 2606)  | 103.03<br>(51.18 - 180.65)  | 4396<br>(2167 - 7661)  | 107.09<br>(52.78 - 186.64)  | 0.146(0.134 - 0.159)   |
| <b>Bermuda</b>                          | 29<br>(15 - 51)       | 235.12<br>(119.34 - 405.22) | 21<br>(11 - 35)        | 222.87<br>(114.84 - 372.68) | -0.19(-0.227 - -0.153) |
| <b>Bhutan</b>                           | 157<br>(76 - 266)     | 72.93<br>(35.26 - 123.78)   | 166<br>(83 - 288)      | 77.37<br>(38.72 - 134.67)   | 0.223(0.15 - 0.297)    |
| <b>Bolivia (Plurinational State of)</b> | 3804<br>(1945 - 6454) | 190.03<br>(97.18 - 322.4)   | 6588<br>(3307 - 10928) | 203.17<br>(101.99 - 337.04) | 0.231(0.192 - 0.271)   |
| <b>Bosnia and Herzegovina</b>           | 1323<br>(674 - 2265)  | 113.22<br>(57.69 - 193.87)  | 666<br>(336 - 1155)    | 117.21<br>(59.11 - 203.18)  | 0.113(-0.009 - 0.235)  |
| <b>Botswana</b>                         | 499<br>(247 - 863)    | 110.63<br>(54.78 - 191.31)  | 766<br>(369 - 1323)    | 117.73<br>(56.75 - 203.52)  | 0.22(0.184 - 0.256)    |

|                          |                            |                             |                            |                             |                       |
|--------------------------|----------------------------|-----------------------------|----------------------------|-----------------------------|-----------------------|
| <b>Brazil</b>            | 126788<br>(71917 - 199756) | 272.21<br>(154.4 - 428.86)  | 143692<br>(82305 - 225446) | 286.05<br>(163.85 - 448.8)  | 0.178(0.159 - 0.198)  |
| <b>Brunei Darussalam</b> | 104<br>(52 - 178)          | 136.59<br>(68.06 - 233.99)  | 158<br>(81 - 272)          | 147.48<br>(75.52 - 253.08)  | 0.267(0.238 - 0.296)  |
| <b>Bulgaria</b>          | 1702<br>(848 - 2944)       | 92.45<br>(46.09 - 159.91)   | 884<br>(437 - 1529)        | 91.78<br>(45.42 - 158.8)    | -0.039(-0.09 - 0.011) |
| <b>Burkina Faso</b>      | 2928<br>(1484 - 5142)      | 99.12<br>(50.25 - 174.07)   | 7537<br>(3745 - 13291)     | 104.32<br>(51.83 - 183.97)  | 0.174(0.146 - 0.201)  |
| <b>Burundi</b>           | 1954<br>(965 - 3484)       | 116.6<br>(57.61 - 207.9)    | 4486<br>(2185 - 7852)      | 117.05<br>(57.03 - 204.89)  | 0.01(-0.111 - 0.13)   |
| <b>Cabo Verde</b>        | 130<br>(65 - 222)          | 113.62<br>(56.65 - 194.74)  | 186<br>(93 - 315)          | 120.76<br>(60.21 - 205)     | 0.211(0.144 - 0.279)  |
| <b>Cambodia</b>          | 1867<br>(928 - 3229)       | 58.35<br>(28.99 - 100.91)   | 2867<br>(1388 - 4925)      | 62.66<br>(30.33 - 107.65)   | 0.246(0.161 - 0.331)  |
| <b>Cameroon</b>          | 3369<br>(1650 - 5907)      | 104.56<br>(51.22 - 183.34)  | 10358<br>(5178 - 18063)    | 106.88<br>(53.43 - 186.38)  | 0.057(0.029 - 0.086)  |
| <b>Canada</b>            | 13129<br>(7132 - 20917)    | 225.23<br>(122.35 - 358.83) | 14414<br>(7981 - 22821)    | 227.96<br>(126.23 - 360.92) | 0.041(-0.011 - 0.094) |

|                                 |                            |                            |                           |                             |                         |
|---------------------------------|----------------------------|----------------------------|---------------------------|-----------------------------|-------------------------|
| <b>Central African Republic</b> | 931<br>(469 - 1604)        | 109.54<br>(55.13 - 188.74) | 1934<br>(967 - 3359)      | 110.49<br>(55.25 - 191.9)   | 0.024(-0.023 - 0.072)   |
| <b>Chad</b>                     | 1881<br>(920 - 3259)       | 103.11<br>(50.42 - 178.68) | 5512<br>(2703 - 9508)     | 102.71<br>(50.36 - 177.19)  | -0.031(-0.061 - -0.001) |
| <b>Chile</b>                    | 8373<br>(4234 - 14353)     | 222.9<br>(112.73 - 382.1)  | 9218<br>(4664 - 15676)    | 241.31<br>(122.1 - 410.39)  | 0.282(0.207 - 0.357)    |
| <b>China</b>                    | 140808<br>(77407 - 220951) | 38.89<br>(21.38 - 61.03)   | 87241<br>(48684 - 138617) | 38.32<br>(21.38 - 60.89)    | -0.074(-0.171 - 0.024)  |
| <b>Colombia</b>                 | 17182<br>(9318 - 27750)    | 167.99<br>(91.1 - 271.31)  | 20693<br>(11343 - 32616)  | 175.03<br>(95.94 - 275.88)  | 0.149(0.108 - 0.19)     |
| <b>Comoros</b>                  | 184<br>(93 - 327)          | 119.55<br>(60.25 - 212.1)  | 270<br>(132 - 470)        | 125.88<br>(61.58 - 218.84)  | 0.189(0.167 - 0.211)    |
| <b>Congo</b>                    | 904<br>(449 - 1564)        | 111.28<br>(55.32 - 192.58) | 1745<br>(870 - 3005)      | 111.68<br>(55.7 - 192.37)   | 0.008(-0.038 - 0.053)   |
| <b>Cook Islands</b>             | 3<br>(1 - 5)               | 51.54<br>(25.15 - 91.04)   | 2<br>(1 - 4)              | 52.47<br>(25.07 - 91.39)    | 0.049(-0.048 - 0.145)   |
| <b>Costa Rica</b>               | 1785<br>(910 - 3081)       | 193.78<br>(98.8 - 334.56)  | 2290<br>(1166 - 3908)     | 204.73<br>(104.26 - 349.45) | 0.198(0.169 - 0.228)    |

|                                              |                         |                             |                          |                             |                         |
|----------------------------------------------|-------------------------|-----------------------------|--------------------------|-----------------------------|-------------------------|
| <b>Côte d'Ivoire</b>                         | 4053<br>(2042 - 6934)   | 105.93<br>(53.37 - 181.23)  | 8695<br>(4419 - 14881)   | 107.71<br>(54.74 - 184.35)  | 0.053(0.026 - 0.081)    |
| <b>Croatia</b>                               | 1145<br>(574 - 1919)    | 110.85<br>(55.59 - 185.86)  | 773<br>(381 - 1305)      | 114<br>(56.26 - 192.55)     | 0.105(0.025 - 0.186)    |
| <b>Cuba</b>                                  | 7225<br>(3698 - 12243)  | 233.68<br>(119.62 - 396.01) | 4496<br>(2280 - 7795)    | 225.97<br>(114.6 - 391.77)  | -0.119(-0.216 - -0.023) |
| <b>Cyprus</b>                                | 387<br>(194 - 661)      | 203.77<br>(102.04 - 347.79) | 457<br>(236 - 780)       | 211.22<br>(109.31 - 360.65) | 0.133(0.095 - 0.172)    |
| <b>Czechia</b>                               | 2530<br>(1257 - 4382)   | 106.38<br>(52.86 - 184.26)  | 1614<br>(799 - 2715)     | 106.19<br>(52.6 - 178.62)   | -0.012(-0.078 - 0.055)  |
| <b>Democratic People's Republic of Korea</b> | 2013<br>(967 - 3583)    | 36.43<br>(17.5 - 64.84)     | 2048<br>(1011 - 3660)    | 37.25<br>(18.38 - 66.57)    | 0.075(-0.009 - 0.159)   |
| <b>Democratic Republic of the Congo</b>      | 13063<br>(6495 - 22292) | 108.76<br>(54.07 - 185.59)  | 31955<br>(15372 - 53947) | 110.28<br>(53.05 - 186.18)  | 0.043(0.004 - 0.083)    |
| <b>Denmark</b>                               | 2536<br>(1278 - 4249)   | 231.95<br>(116.87 - 388.61) | 2380<br>(1226 - 3998)    | 223.2<br>(114.94 - 374.9)   | -0.139(-0.187 - -0.092) |
| <b>Djibouti</b>                              | 211<br>(103 - 366)      | 125.41<br>(61.46 - 217.62)  | 409<br>(203 - 706)       | 124.7<br>(61.94 - 215.32)   | -0.003(-0.06 - 0.053)   |

|                           |                          |                             |                          |                             |                         |
|---------------------------|--------------------------|-----------------------------|--------------------------|-----------------------------|-------------------------|
| <b>Dominica</b>           | 46<br>(24 - 79)          | 201.75<br>(103.24 - 344.5)  | 34<br>(17 - 57)          | 207.84<br>(102.84 - 348.37) | 0.098(0.046 - 0.151)    |
| <b>Dominican Republic</b> | 4944<br>(2492 - 8401)    | 207.71<br>(104.7 - 352.95)  | 6174<br>(3183 - 10533)   | 212.94<br>(109.77 - 363.27) | 0.087(0.053 - 0.122)    |
| <b>Ecuador</b>            | 6490<br>(3323 - 11102)   | 198.96<br>(101.88 - 340.31) | 10233<br>(5208 - 17665)  | 208.42<br>(106.07 - 359.8)  | 0.175(0.15 - 0.2)       |
| <b>Egypt</b>              | 27464<br>(14055 - 46866) | 160.04<br>(81.9 - 273.1)    | 46471<br>(23732 - 80360) | 163.61<br>(83.56 - 282.93)  | 0.076(0.041 - 0.11)     |
| <b>El Salvador</b>        | 3188<br>(1658 - 5482)    | 179.3<br>(93.25 - 308.35)   | 3450<br>(1786 - 5976)    | 196.4<br>(101.65 - 340.19)  | 0.317(0.244 - 0.391)    |
| <b>Equatorial Guinea</b>  | 139<br>(68 - 243)        | 108.25<br>(53.37 - 189.62)  | 609<br>(300 - 1064)      | 114.77<br>(56.55 - 200.54)  | 0.202(0.157 - 0.246)    |
| <b>Eritrea</b>            | 1157<br>(566 - 1983)     | 117.06<br>(57.25 - 200.72)  | 2781<br>(1364 - 4804)    | 123.2<br>(60.44 - 212.88)   | 0.177(0.124 - 0.231)    |
| <b>Estonia</b>            | 344<br>(169 - 588)       | 105.47<br>(51.68 - 179.99)  | 204<br>(101 - 349)       | 103.39<br>(51.28 - 176.8)   | -0.084(-0.158 - -0.011) |
| <b>Eswatini</b>           | 301<br>(148 - 533)       | 109.36<br>(53.95 - 193.68)  | 424<br>(210 - 738)       | 115.69<br>(57.45 - 201.59)  | 0.198(0.15 - 0.247)     |

|                 |                          |                             |                          |                             |                         |
|-----------------|--------------------------|-----------------------------|--------------------------|-----------------------------|-------------------------|
| <b>Ethiopia</b> | 19071<br>(10625 - 30172) | 116.25<br>(64.76 - 183.92)  | 45407<br>(24668 - 71678) | 121.77<br>(66.15 - 192.22)  | 0.162(0.134 - 0.19)     |
| <b>Fiji</b>     | 119<br>(60 - 207)        | 49.91<br>(25.27 - 86.75)    | 120<br>(59 - 212)        | 51.02<br>(24.89 - 89.77)    | 0.088(0.052 - 0.124)    |
| <b>Finland</b>  | 2002<br>(1039 - 3290)    | 205.7<br>(106.71 - 337.97)  | 1847<br>(966 - 3113)     | 201.31<br>(105.26 - 339.28) | -0.079(-0.133 - -0.026) |
| <b>France</b>   | 26517<br>(13679 - 44587) | 209.83<br>(108.24 - 352.82) | 24516<br>(12766 - 42164) | 202.9<br>(105.66 - 348.96)  | -0.117(-0.141 - -0.093) |
| <b>Gabon</b>    | 345<br>(174 - 600)       | 113.12<br>(57.06 - 196.9)   | 623<br>(313 - 1054)      | 117.25<br>(58.91 - 198.16)  | 0.127(0.089 - 0.165)    |
| <b>Gambia</b>   | 337<br>(167 - 580)       | 107.39<br>(53.34 - 184.99)  | 839<br>(403 - 1433)      | 109.39<br>(52.6 - 186.83)   | 0.053(0.019 - 0.087)    |
| <b>Georgia</b>  | 1363<br>(668 - 2342)     | 106.14<br>(51.99 - 182.33)  | 664<br>(336 - 1144)      | 105.93<br>(53.6 - 182.43)   | -0.012(-0.077 - 0.054)  |
| <b>Germany</b>  | 27924<br>(15814 - 43999) | 187.5<br>(106.18 - 295.43)  | 23257<br>(13063 - 37229) | 182.01<br>(102.24 - 291.37) | -0.093(-0.157 - -0.029) |
| <b>Ghana</b>    | 5022<br>(2524 - 8953)    | 106.52<br>(53.52 - 189.9)   | 11043<br>(5455 - 19317)  | 111.18<br>(54.93 - 194.5)   | 0.168(0.154 - 0.182)    |

|                      |                       |                             |                         |                             |                         |
|----------------------|-----------------------|-----------------------------|-------------------------|-----------------------------|-------------------------|
| <b>Greece</b>        | 4835<br>(2516 - 8153) | 206.35<br>(107.37 - 347.98) | 3149<br>(1616 - 5298)   | 203.06<br>(104.2 - 341.57)  | -0.058(-0.087 - -0.029) |
| <b>Greenland</b>     | 23<br>(12 - 39)       | 163.06<br>(83.63 - 280.47)  | 19<br>(10 - 32)         | 163.97<br>(85.01 - 282.79)  | 0.032(-0.019 - 0.083)   |
| <b>Grenada</b>       | 53<br>(26 - 90)       | 201.51<br>(99.95 - 342.57)  | 58<br>(29 - 98)         | 221.09<br>(112.02 - 375.81) | 0.331(0.287 - 0.375)    |
| <b>Guam</b>          | 22<br>(11 - 37)       | 55.35<br>(27.06 - 95.64)    | 22<br>(11 - 39)         | 53.07<br>(25.57 - 93.54)    | -0.156(-0.209 - -0.103) |
| <b>Guatemala</b>     | 4274<br>(2143 - 7238) | 171.61<br>(86.06 - 290.63)  | 10576<br>(5314 - 18059) | 187.26<br>(94.09 - 319.74)  | 0.306(0.246 - 0.366)    |
| <b>Guinea</b>        | 1824<br>(929 - 3130)  | 103.32<br>(52.64 - 177.32)  | 4225<br>(2066 - 7339)   | 104.05<br>(50.88 - 180.74)  | 0.018(-0.014 - 0.051)   |
| <b>Guinea-Bissau</b> | 335<br>(169 - 582)    | 103.61<br>(52.39 - 179.96)  | 669<br>(335 - 1173)     | 106.63<br>(53.38 - 187.01)  | 0.108(0.081 - 0.135)    |
| <b>Guyana</b>        | 514<br>(258 - 875)    | 198.17<br>(99.38 - 337.54)  | 466<br>(235 - 791)      | 209.7<br>(105.74 - 355.75)  | 0.204(0.152 - 0.256)    |
| <b>Haiti</b>         | 3604<br>(1822 - 6199) | 185.79<br>(93.93 - 319.6)   | 7077<br>(3642 - 12095)  | 192.48<br>(99.05 - 328.93)  | 0.125(0.065 - 0.184)    |

|                                   |                            |                             |                             |                             |                      |
|-----------------------------------|----------------------------|-----------------------------|-----------------------------|-----------------------------|----------------------|
| <b>Honduras</b>                   | 2643<br>(1332 - 4555)      | 172.46<br>(86.89 - 297.23)  | 5919<br>(3010 - 10282)      | 188.69<br>(95.95 - 327.77)  | 0.312(0.279 - 0.344) |
| <b>Hungary</b>                    | 2448<br>(1232 - 4217)      | 106.14<br>(53.43 - 182.83)  | 1676<br>(835 - 2921)        | 112.07<br>(55.83 - 195.35)  | 0.186(0.097 - 0.275) |
| <b>Iceland</b>                    | 128<br>(66 - 222)          | 201.88<br>(104.91 - 351.32) | 141<br>(72 - 236)           | 207.03<br>(106.48 - 346.42) | 0.087(0.029 - 0.145) |
| <b>India</b>                      | 159947<br>(87206 - 254420) | 62.02<br>(33.82 - 98.66)    | 259227<br>(145149 - 409224) | 65.24<br>(36.53 - 102.99)   | 0.17(0.15 - 0.19)    |
| <b>Indonesia</b>                  | 35380<br>(19536 - 57172)   | 59.48<br>(32.85 - 96.12)    | 41951<br>(23344 - 66274)    | 61.8<br>(34.39 - 97.62)     | 0.133(0.109 - 0.157) |
| <b>Iran (Islamic Republic of)</b> | 32155<br>(17916 - 50596)   | 167.48<br>(93.32 - 263.52)  | 31655<br>(17785 - 49750)    | 179.83<br>(101.03 - 282.63) | 0.244(0.195 - 0.292) |
| <b>Iraq</b>                       | 8334<br>(4152 - 14740)     | 146.41<br>(72.95 - 258.95)  | 20798<br>(10524 - 36792)    | 157.52<br>(79.71 - 278.66)  | 0.257(0.218 - 0.296) |
| <b>Ireland</b>                    | 1445<br>(742 - 2312)       | 148.39<br>(76.16 - 237.44)  | 1432<br>(751 - 2347)        | 150.15<br>(78.69 - 246.05)  | 0.04(-0.006 - 0.085) |
| <b>Israel</b>                     | 3163<br>(1589 - 5341)      | 232.5<br>(116.78 - 392.63)  | 5138<br>(2583 - 8782)       | 237.22<br>(119.27 - 405.48) | 0.072(0.04 - 0.103)  |

|                   |                          |                             |                          |                             |                       |
|-------------------|--------------------------|-----------------------------|--------------------------|-----------------------------|-----------------------|
| <b>Italy</b>      | 23677<br>(13280 - 37060) | 189.14<br>(106.08 - 296.04) | 16364<br>(9165 - 25444)  | 187.8<br>(105.18 - 292)     | -0.026(-0.061 - 0.01) |
| <b>Jamaica</b>    | 1638<br>(824 - 2807)     | 214.53<br>(107.9 - 367.55)  | 1680<br>(855 - 2798)     | 227.01<br>(115.51 - 378.03) | 0.192(0.151 - 0.233)  |
| <b>Japan</b>      | 41568<br>(23268 - 65122) | 147.91<br>(82.79 - 231.71)  | 25399<br>(14335 - 39799) | 143.49<br>(80.98 - 224.84)  | -0.11(-0.17 - -0.05)  |
| <b>Jordan</b>     | 2419<br>(1243 - 4100)    | 176.9<br>(90.92 - 299.86)   | 6342<br>(3192 - 10796)   | 179<br>(90.08 - 304.7)      | 0.028(-0.043 - 0.1)   |
| <b>Kazakhstan</b> | 4392<br>(2167 - 7657)    | 100.56<br>(49.61 - 175.29)  | 3950<br>(1976 - 6809)    | 101.09<br>(50.57 - 174.25)  | 0.016(-0.071 - 0.104) |
| <b>Kenya</b>      | 9208<br>(5065 - 14566)   | 116.19<br>(63.91 - 183.8)   | 20796<br>(11460 - 32643) | 121.29<br>(66.84 - 190.39)  | 0.146(0.126 - 0.167)  |
| <b>Kiribati</b>   | 11<br>(5 - 20)           | 50.65<br>(24.5 - 90.95)     | 17<br>(9 - 31)           | 49.5<br>(24.55 - 88.11)     | -0.072(-0.16 - 0.016) |
| <b>Kuwait</b>     | 900<br>(454 - 1518)      | 189.83<br>(95.84 - 320.34)  | 1539<br>(800 - 2619)     | 191.82<br>(99.73 - 326.46)  | 0.021(-0.06 - 0.103)  |
| <b>Kyrgyzstan</b> | 1299<br>(659 - 2222)     | 100.52<br>(50.96 - 171.9)   | 1772<br>(893 - 3040)     | 104.4<br>(52.6 - 179.15)    | 0.133(0.076 - 0.191)  |

|                                         |                       |                             |                         |                             |                         |
|-----------------------------------------|-----------------------|-----------------------------|-------------------------|-----------------------------|-------------------------|
| <b>Lao People's Democratic Republic</b> | 766<br>(377 - 1327)   | 59.17<br>(29.09 - 102.44)   | 1353<br>(653 - 2372)    | 64.23<br>(31.03 - 112.65)   | 0.288(0.241 - 0.336)    |
| <b>Latvia</b>                           | 583<br>(285 - 1004)   | 107.95<br>(52.8 - 186.1)    | 283<br>(141 - 482)      | 103.14<br>(51.25 - 175.93)  | -0.16(-0.256 - -0.064)  |
| <b>Lebanon</b>                          | 2038<br>(1123 - 3288) | 217.22<br>(119.68 - 350.45) | 2423<br>(1308 - 3848)   | 219.49<br>(118.51 - 348.57) | 0.034(-0.021 - 0.088)   |
| <b>Lesotho</b>                          | 655<br>(326 - 1129)   | 109.64<br>(54.64 - 188.9)   | 767<br>(389 - 1311)     | 117.64<br>(59.63 - 200.97)  | 0.243(0.198 - 0.288)    |
| <b>Liberia</b>                          | 554<br>(275 - 967)    | 95.81<br>(47.63 - 167.18)   | 1688<br>(844 - 2911)    | 106.37<br>(53.17 - 183.4)   | 0.317(0.166 - 0.467)    |
| <b>Libya</b>                            | 2416<br>(1230 - 4143) | 168.94<br>(86.02 - 289.76)  | 3168<br>(1633 - 5382)   | 183.07<br>(94.33 - 310.99)  | 0.272(0.198 - 0.347)    |
| <b>Lithuania</b>                        | 886<br>(443 - 1505)   | 108.24<br>(54.1 - 183.97)   | 483<br>(248 - 821)      | 111.62<br>(57.26 - 189.77)  | 0.114(0.048 - 0.179)    |
| <b>Luxembourg</b>                       | 154<br>(78 - 260)     | 212.65<br>(107.5 - 360.46)  | 218<br>(113 - 363)      | 207.66<br>(107.64 - 346.85) | -0.085(-0.142 - -0.028) |
| <b>Madagascar</b>                       | 4484<br>(2258 - 7683) | 117.09<br>(58.97 - 200.62)  | 10642<br>(5190 - 18518) | 120.83<br>(58.92 - 210.26)  | 0.11(0.088 - 0.132)     |

|                         |                          |                             |                           |                             |                        |
|-------------------------|--------------------------|-----------------------------|---------------------------|-----------------------------|------------------------|
| <b>Malawi</b>           | 3617<br>(1786 - 6318)    | 118.51<br>(58.52 - 207.02)  | 7855<br>(3918 - 13630)    | 118.21<br>(58.96 - 205.1)   | -0.03(-0.107 - 0.047)  |
| <b>Malaysia</b>         | 3375<br>(1657 - 5878)    | 62.73<br>(30.81 - 109.25)   | 5505<br>(2629 - 9600)     | 67.42<br>(32.19 - 117.57)   | 0.249(0.224 - 0.275)   |
| <b>Maldives</b>         | 44<br>(22 - 77)          | 60.87<br>(30.17 - 107.87)   | 70<br>(34 - 121)          | 68.59<br>(33.31 - 118.53)   | 0.413(0.302 - 0.524)   |
| <b>Mali</b>             | 2610<br>(1294 - 4465)    | 102.59<br>(50.86 - 175.51)  | 7697<br>(3864 - 13494)    | 105.48<br>(52.96 - 184.93)  | 0.102(0.059 - 0.145)   |
| <b>Malta</b>            | 163<br>(85 - 275)        | 199.47<br>(103.39 - 336.39) | 140<br>(73 - 236)         | 213.05<br>(111.21 - 360.4)  | 0.225(0.16 - 0.291)    |
| <b>Marshall Islands</b> | 7<br>(3 - 12)            | 46.31<br>(22.37 - 80.27)    | 8<br>(4 - 14)             | 49.69<br>(24.1 - 87.03)     | 0.248(0.195 - 0.301)   |
| <b>Mauritania</b>       | 687<br>(337 - 1203)      | 107.96<br>(52.97 - 189.05)  | 1451<br>(724 - 2499)      | 107.69<br>(53.74 - 185.55)  | -0.003(-0.047 - 0.041) |
| <b>Mauritius</b>        | 209<br>(104 - 360)       | 64.19<br>(31.89 - 110.37)   | 183<br>(90 - 321)         | 68.27<br>(33.7 - 119.61)    | 0.207(0.139 - 0.275)   |
| <b>Mexico</b>           | 60035<br>(33416 - 94194) | 206.29<br>(114.82 - 323.66) | 69982<br>(39085 - 109247) | 214.45<br>(119.77 - 334.76) | 0.134(0.124 - 0.144)   |

|                                         |                         |                             |                         |                             |                        |
|-----------------------------------------|-------------------------|-----------------------------|-------------------------|-----------------------------|------------------------|
| <b>Micronesia (Federated States of)</b> | 16<br>(8 - 28)          | 47.1<br>(22.56 - 82.27)     | 16<br>(8 - 29)          | 51.17<br>(24.99 - 91.51)    | 0.281(0.201 - 0.36)    |
| <b>Monaco</b>                           | 10<br>(5 - 16)          | 219.51<br>(114.13 - 365.54) | 11<br>(5 - 19)          | 207.27<br>(103.25 - 353.09) | -0.199(-0.24 - -0.157) |
| <b>Mongolia</b>                         | 693<br>(342 - 1206)     | 98.11<br>(48.49 - 170.83)   | 740<br>(368 - 1269)     | 101.39<br>(50.45 - 173.89)  | 0.114(0.052 - 0.176)   |
| <b>Montenegro</b>                       | 174<br>(82 - 300)       | 109.7<br>(51.85 - 189.66)   | 135<br>(69 - 230)       | 112.7<br>(57.58 - 192.1)    | 0.099(0.065 - 0.134)   |
| <b>Morocco</b>                          | 13682<br>(6894 - 23212) | 168.76<br>(85.03 - 286.31)  | 16102<br>(8059 - 27106) | 173.14<br>(86.65 - 291.45)  | 0.084(0.035 - 0.133)   |
| <b>Mozambique</b>                       | 4529<br>(2322 - 7929)   | 111.03<br>(56.93 - 194.38)  | 11516<br>(5960 - 19661) | 116.6<br>(60.35 - 199.07)   | 0.17(0.091 - 0.248)    |
| <b>Myanmar</b>                          | 7711<br>(3753 - 13299)  | 60.13<br>(29.26 - 103.7)    | 9091<br>(4463 - 15900)  | 62.19<br>(30.53 - 108.77)   | 0.106(0.069 - 0.143)   |
| <b>Namibia</b>                          | 543<br>(280 - 937)      | 114.44<br>(59.06 - 197.41)  | 863<br>(438 - 1485)     | 118.21<br>(60.04 - 203.53)  | 0.099(0.05 - 0.148)    |
| <b>Nauru</b>                            | 1<br>(1 - 3)            | 49.08<br>(23.7 - 84.02)     | 2<br>(1 - 3)            | 49.78<br>(23.9 - 86.71)     | 0.027(-0.017 - 0.071)  |

|                                 |                          |                             |                           |                             |                         |
|---------------------------------|--------------------------|-----------------------------|---------------------------|-----------------------------|-------------------------|
| <b>Nepal</b>                    | 4064<br>(2004 - 7312)    | 68.29<br>(33.67 - 122.87)   | 7048<br>(3495 - 12319)    | 73.79<br>(36.59 - 128.96)   | 0.286(0.258 - 0.314)    |
| <b>Netherlands</b>              | 6562<br>(3880 - 10053)   | 200.32<br>(118.45 - 306.86) | 5871<br>(3484 - 8911)     | 193.38<br>(114.76 - 293.51) | -0.119(-0.157 - -0.08)  |
| <b>New Zealand</b>              | 3363<br>(1883 - 5298)    | 399.61<br>(223.66 - 629.4)  | 3532<br>(1953 - 5626)     | 399.03<br>(220.68 - 635.52) | -0.009(-0.03 - 0.012)   |
| <b>Nicaragua</b>                | 2353<br>(1194 - 4047)    | 179.77<br>(91.2 - 309.13)   | 3693<br>(1916 - 6270)     | 194.17<br>(100.76 - 329.69) | 0.27(0.241 - 0.3)       |
| <b>Niger</b>                    | 2493<br>(1210 - 4375)    | 101.96<br>(49.47 - 178.91)  | 7929<br>(3895 - 14132)    | 102.85<br>(50.52 - 183.29)  | 0.018(-0.035 - 0.071)   |
| <b>Nigeria</b>                  | 29296<br>(16188 - 46519) | 104.05<br>(57.5 - 165.22)   | 74477<br>(40720 - 119356) | 102.6<br>(56.1 - 164.43)    | -0.049(-0.056 - -0.043) |
| <b>Niue</b>                     | 0<br>(0 - 1)             | 49.09<br>(23.93 - 86.38)    | 0<br>(0 - 0)              | 50.77<br>(25.18 - 88.07)    | 0.134(-0.033 - 0.302)   |
| <b>North Macedonia</b>          | 570<br>(288 - 978)       | 109.86<br>(55.5 - 188.4)    | 441<br>(220 - 754)        | 115.83<br>(57.73 - 197.75)  | 0.194(0.122 - 0.266)    |
| <b>Northern Mariana Islands</b> | 7<br>(4 - 12)            | 57.07<br>(27.93 - 97.19)    | 6<br>(3 - 10)             | 56.53<br>(27.78 - 98.09)    | -0.055(-0.593 - 0.487)  |

|                         |                          |                             |                          |                             |                         |
|-------------------------|--------------------------|-----------------------------|--------------------------|-----------------------------|-------------------------|
| <b>Norway</b>           | 1700<br>(949 - 2677)     | 185.39<br>(103.56 - 292.07) | 1736<br>(972 - 2702)     | 176.76<br>(99.02 - 275.19)  | -0.169(-0.208 - -0.131) |
| <b>Oman</b>             | 769<br>(396 - 1294)      | 140.02<br>(72.22 - 235.68)  | 1554<br>(805 - 2589)     | 163.8<br>(84.86 - 272.89)   | 0.53(0.373 - 0.686)     |
| <b>Pakistan</b>         | 23854<br>(13079 - 38411) | 66.82<br>(36.64 - 107.59)   | 50656<br>(27447 - 80027) | 69.02<br>(37.4 - 109.04)    | 0.111(0.084 - 0.139)    |
| <b>Palau</b>            | 2<br>(1 - 4)             | 52.68<br>(25.75 - 95.48)    | 2<br>(1 - 3)             | 52.05<br>(25.29 - 89.55)    | -0.044(-0.155 - 0.068)  |
| <b>Palestine</b>        | 1162<br>(582 - 1978)     | 171.66<br>(85.96 - 292.32)  | 2852<br>(1474 - 4882)    | 177.13<br>(91.56 - 303.25)  | 0.106(0.043 - 0.169)    |
| <b>Panama</b>           | 1435<br>(723 - 2450)     | 190.36<br>(95.88 - 325.01)  | 2069<br>(1049 - 3557)    | 193<br>(97.87 - 331.76)     | 0.044(-0.02 - 0.108)    |
| <b>Papua New Guinea</b> | 633<br>(314 - 1089)      | 48.4<br>(23.98 - 83.23)     | 1467<br>(724 - 2611)     | 50.29<br>(24.82 - 89.47)    | 0.119(0.064 - 0.175)    |
| <b>Paraguay</b>         | 3126<br>(1581 - 5337)    | 253.55<br>(128.23 - 432.91) | 5227<br>(2667 - 8729)    | 267.91<br>(136.71 - 447.4)  | 0.2(0.169 - 0.231)      |
| <b>Peru</b>             | 14165<br>(7271 - 24201)  | 201.31<br>(103.34 - 343.94) | 18142<br>(9208 - 30680)  | 209.01<br>(106.09 - 353.46) | 0.134(0.089 - 0.179)    |

|                            |                          |                             |                          |                             |                        |
|----------------------------|--------------------------|-----------------------------|--------------------------|-----------------------------|------------------------|
| <b>Philippines</b>         | 12253<br>(6756 - 19639)  | 59.73<br>(32.93 - 95.73)    | 19935<br>(11002 - 31785) | 62.18<br>(34.32 - 99.15)    | 0.136(0.111 - 0.161)   |
| <b>Poland</b>              | 8756<br>(4893 - 13792)   | 101.93<br>(56.96 - 160.54)  | 6426<br>(3603 - 10096)   | 109.48<br>(61.39 - 172)     | 0.253(0.218 - 0.289)   |
| <b>Portugal</b>            | 5059<br>(2651 - 8339)    | 202.89<br>(106.3 - 334.39)  | 3458<br>(1900 - 5551)    | 207.17<br>(113.82 - 332.54) | 0.068(0.045 - 0.091)   |
| <b>Puerto Rico</b>         | 2113<br>(1062 - 3636)    | 215.07<br>(108.07 - 370.21) | 1518<br>(773 - 2556)     | 225.44<br>(114.76 - 379.6)  | 0.167(0.131 - 0.203)   |
| <b>Qatar</b>               | 173<br>(86 - 299)        | 175.15<br>(86.5 - 301.88)   | 974<br>(505 - 1679)      | 191.01<br>(99.02 - 329.18)  | 0.323(0.206 - 0.439)   |
| <b>Republic of Korea</b>   | 14851<br>(7447 - 24797)  | 112.89<br>(56.61 - 188.49)  | 10163<br>(5266 - 17464)  | 121.33<br>(62.87 - 208.49)  | 0.256(0.185 - 0.328)   |
| <b>Republic of Moldova</b> | 1040<br>(524 - 1761)     | 101.11<br>(50.97 - 171.09)  | 649<br>(330 - 1117)      | 106.36<br>(54.15 - 183.13)  | 0.185(0.134 - 0.236)   |
| <b>Romania</b>             | 7962<br>(4181 - 13382)   | 134.75<br>(70.76 - 226.49)  | 4150<br>(2179 - 6890)    | 133.29<br>(69.98 - 221.29)  | -0.057(-0.169 - 0.055) |
| <b>Russian Federation</b>  | 31484<br>(17380 - 49496) | 99.94<br>(55.17 - 157.12)   | 22541<br>(12534 - 35972) | 98.85<br>(54.97 - 157.75)   | -0.04(-0.12 - 0.039)   |

|                                         |                        |                             |                         |                             |                        |
|-----------------------------------------|------------------------|-----------------------------|-------------------------|-----------------------------|------------------------|
| <b>Rwanda</b>                           | 2657<br>(1324 - 4601)  | 117.56<br>(58.59 - 203.6)   | 5124<br>(2532 - 8863)   | 122.17<br>(60.37 - 211.34)  | 0.12(-0.013 - 0.253)   |
| <b>Saint Kitts and Nevis</b>            | 26<br>(13 - 45)        | 205.12<br>(104.94 - 355.66) | 28<br>(14 - 48)         | 214.69<br>(108.3 - 362.45)  | 0.159(0.128 - 0.19)    |
| <b>Saint Lucia</b>                      | 94<br>(48 - 161)       | 206.79<br>(106.39 - 354.93) | 87<br>(44 - 149)        | 221.37<br>(111.81 - 376.92) | 0.234(0.191 - 0.277)   |
| <b>Saint Vincent and the Grenadines</b> | 75<br>(38 - 128)       | 201.69<br>(101.25 - 342.9)  | 57<br>(29 - 98)         | 212.6<br>(107.1 - 363.06)   | 0.182(0.146 - 0.218)   |
| <b>Samoa</b>                            | 29<br>(14 - 52)        | 49.37<br>(23.34 - 88.61)    | 34<br>(17 - 59)         | 49.14<br>(24.27 - 86.17)    | -0.013(-0.05 - 0.024)  |
| <b>San Marino</b>                       | 12<br>(6 - 20)         | 215.07<br>(111.53 - 362.48) | 13<br>(7 - 22)          | 210.06<br>(107.26 - 353.7)  | -0.08(-0.112 - -0.048) |
| <b>Sao Tome and Principe</b>            | 43<br>(21 - 74)        | 105.49<br>(52.15 - 182.29)  | 75<br>(36 - 129)        | 110.44<br>(53.81 - 191.04)  | 0.164(0.11 - 0.217)    |
| <b>Saudi Arabia</b>                     | 9047<br>(4493 - 15368) | 177.87<br>(88.35 - 302.16)  | 16043<br>(7993 - 27291) | 193.77<br>(96.54 - 329.63)  | 0.298(0.26 - 0.335)    |
| <b>Senegal</b>                          | 2550<br>(1286 - 4404)  | 105.41<br>(53.17 - 182.06)  | 5423<br>(2715 - 9052)   | 108.44<br>(54.28 - 181.01)  | 0.108(0.091 - 0.124)   |

|                        |                         |                             |                         |                            |                        |
|------------------------|-------------------------|-----------------------------|-------------------------|----------------------------|------------------------|
| <b>Serbia</b>          | 2252<br>(1138 - 3885)   | 107.53<br>(54.32 - 185.48)  | 1754<br>(868 - 3006)    | 111.65<br>(55.23 - 191.31) | 0.12(0.035 - 0.205)    |
| <b>Seychelles</b>      | 14<br>(7 - 25)          | 64.83<br>(32.67 - 114.1)    | 14<br>(7 - 25)          | 66.22<br>(32.9 - 115.23)   | 0.085(0.053 - 0.117)   |
| <b>Sierra Leone</b>    | 1132<br>(564 - 1969)    | 105.66<br>(52.67 - 183.83)  | 2985<br>(1471 - 5270)   | 108.57<br>(53.5 - 191.65)  | 0.106(0.012 - 0.201)   |
| <b>Singapore</b>       | 1572<br>(837 - 2668)    | 190.62<br>(101.55 - 323.58) | 1433<br>(746 - 2385)    | 190.92<br>(99.38 - 317.79) | 0.03(-0.08 - 0.14)     |
| <b>Slovakia</b>        | 1349<br>(667 - 2303)    | 105.95<br>(52.38 - 180.88)  | 942<br>(473 - 1621)     | 112.02<br>(56.19 - 192.75) | 0.214(0.16 - 0.267)    |
| <b>Slovenia</b>        | 491<br>(250 - 842)      | 110.89<br>(56.4 - 190.03)   | 321<br>(161 - 557)      | 110.4<br>(55.22 - 191.61)  | -0.006(-0.055 - 0.043) |
| <b>Solomon Islands</b> | 56<br>(27 - 100)        | 48.17<br>(23.05 - 86.31)    | 99<br>(47 - 173)        | 48.96<br>(23.25 - 85.38)   | 0.06(0.02 - 0.101)     |
| <b>Somalia</b>         | 2475<br>(1242 - 4267)   | 108.05<br>(54.2 - 186.28)   | 8105<br>(4109 - 13957)  | 118.33<br>(59.99 - 203.77) | 0.324(0.229 - 0.419)   |
| <b>South Africa</b>    | 13592<br>(7505 - 21558) | 113.97<br>(62.93 - 180.77)  | 16289<br>(8929 - 26232) | 116.14<br>(63.66 - 187.03) | 0.055(-0.009 - 0.12)   |

|                                   |                          |                             |                          |                             |                         |
|-----------------------------------|--------------------------|-----------------------------|--------------------------|-----------------------------|-------------------------|
| <b>South Sudan</b>                | 2428<br>(1221 - 4201)    | 121.4<br>(61.07 - 210.04)   | 3785<br>(1892 - 6572)    | 117.08<br>(58.52 - 203.26)  | -0.134(-0.182 - -0.086) |
| <b>Spain</b>                      | 20338<br>(10383 - 34732) | 208.8<br>(106.6 - 356.57)   | 14218<br>(7227 - 24411)  | 205.72<br>(104.56 - 353.19) | -0.044(-0.08 - -0.008)  |
| <b>Sri Lanka</b>                  | 3212<br>(1615 - 5434)    | 61.98<br>(31.16 - 104.85)   | 3241<br>(1539 - 5609)    | 62.87<br>(29.85 - 108.8)    | 0.037(-0.006 - 0.08)    |
| <b>Sudan</b>                      | 10509<br>(5353 - 18176)  | 162.86<br>(82.96 - 281.69)  | 22276<br>(11311 - 38878) | 165.62<br>(84.1 - 289.06)   | 0.057(0.034 - 0.08)     |
| <b>Suriname</b>                   | 248<br>(128 - 417)       | 206<br>(106.12 - 345.84)    | 288<br>(150 - 492)       | 202.82<br>(105.82 - 346.52) | -0.056(-0.114 - 0.002)  |
| <b>Sweden</b>                     | 3636<br>(1988 - 5687)    | 219.61<br>(120.08 - 343.51) | 3620<br>(2019 - 5691)    | 209.57<br>(116.88 - 329.42) | -0.161(-0.237 - -0.085) |
| <b>Switzerland</b>                | 2959<br>(1496 - 4902)    | 222.53<br>(112.52 - 368.65) | 2968<br>(1515 - 5060)    | 219.14<br>(111.84 - 373.65) | -0.048(-0.08 - -0.015)  |
| <b>Syrian Arab Republic</b>       | 7250<br>(3668 - 12706)   | 166.33<br>(84.14 - 291.48)  | 8595<br>(4258 - 14720)   | 176.2<br>(87.29 - 301.77)   | 0.203(0.142 - 0.264)    |
| <b>Taiwan (Province of China)</b> | 2104<br>(1038 - 3655)    | 36.81<br>(18.15 - 63.92)    | 1527<br>(769 - 2627)     | 40.47<br>(20.38 - 69.6)     | 0.323(0.234 - 0.412)    |

|                            |                          |                             |                          |                            |                        |
|----------------------------|--------------------------|-----------------------------|--------------------------|----------------------------|------------------------|
| <b>Tajikistan</b>          | 1659<br>(828 - 2811)     | 100.07<br>(49.94 - 169.5)   | 2801<br>(1407 - 4875)    | 103.8<br>(52.14 - 180.69)  | 0.115(0.063 - 0.166)   |
| <b>Thailand</b>            | 11408<br>(5636 - 20110)  | 63.79<br>(31.51 - 112.44)   | 8834<br>(4288 - 15407)   | 67.32<br>(32.67 - 117.4)   | 0.18(0.068 - 0.291)    |
| <b>Timor-Leste</b>         | 136<br>(65 - 238)        | 59.02<br>(28.28 - 103.54)   | 268<br>(130 - 464)       | 58.79<br>(28.39 - 101.73)  | -0.018(-0.069 - 0.033) |
| <b>Togo</b>                | 1248<br>(620 - 2165)     | 104.63<br>(51.95 - 181.51)  | 2635<br>(1297 - 4662)    | 106.74<br>(52.52 - 188.79) | 0.074(0.059 - 0.09)    |
| <b>Tokelau</b>             | 0<br>(0 - 0)             | 48.63<br>(23.72 - 87.39)    | 0<br>(0 - 0)             | 50.81<br>(25.29 - 88.95)   | 0.147(-0.128 - 0.423)  |
| <b>Tonga</b>               | 17<br>(8 - 29)           | 49.7<br>(24.94 - 85.94)     | 16<br>(8 - 27)           | 50.83<br>(25.28 - 87.43)   | 0.074(0.036 - 0.112)   |
| <b>Trinidad and Tobago</b> | 698<br>(347 - 1192)      | 203.23<br>(101.01 - 347.09) | 569<br>(293 - 987)       | 208.8<br>(107.75 - 362.34) | 0.08(-0.001 - 0.16)    |
| <b>Tunisia</b>             | 4764<br>(2415 - 8127)    | 178.22<br>(90.33 - 304.02)  | 4520<br>(2262 - 7510)    | 181.99<br>(91.07 - 302.4)  | 0.072(0.015 - 0.129)   |
| <b>Turkey</b>              | 33980<br>(17231 - 57938) | 178.87<br>(90.7 - 304.99)   | 36752<br>(18564 - 62880) | 193.15<br>(97.56 - 330.46) | 0.27(0.238 - 0.303)    |

|                                     |                           |                             |                            |                             |                         |
|-------------------------------------|---------------------------|-----------------------------|----------------------------|-----------------------------|-------------------------|
| <b>Turkmenistan</b>                 | 1138<br>(556 - 1954)      | 99.04<br>(48.4 - 170.12)    | 1274<br>(645 - 2214)       | 101.58<br>(51.46 - 176.5)   | 0.078(-0.014 - 0.169)   |
| <b>Tuvalu</b>                       | 1<br>(1 - 2)              | 51<br>(24.18 - 90.35)       | 2<br>(1 - 3)               | 51.17<br>(25.02 - 89.62)    | -0.004(-0.028 - 0.02)   |
| <b>Uganda</b>                       | 6688<br>(3347 - 11448)    | 118.29<br>(59.2 - 202.5)    | 17135<br>(8605 - 29627)    | 119<br>(59.76 - 205.75)     | 0.023(-0.054 - 0.099)   |
| <b>Ukraine</b>                      | 10950<br>(5859 - 17430)   | 101.04<br>(54.06 - 160.82)  | 6701<br>(3687 - 10529)     | 101.53<br>(55.86 - 159.53)  | 0(-0.119 - 0.12)        |
| <b>United Arab Emirates</b>         | 749<br>(375 - 1285)       | 177.64<br>(88.84 - 304.7)   | 1844<br>(910 - 3137)       | 174.06<br>(85.93 - 296.14)  | -0.067(-0.15 - 0.016)   |
| <b>United Kingdom</b>               | 30581<br>(17111 - 48195)  | 258.38<br>(144.57 - 407.2)  | 29504<br>(16637 - 46691)   | 250.55<br>(141.28 - 396.5)  | -0.107(-0.147 - -0.066) |
| <b>United Republic of Tanzania</b>  | 10008<br>(5007 - 17276)   | 117.5<br>(58.79 - 202.84)   | 22082<br>(10967 - 37237)   | 120.36<br>(59.78 - 202.97)  | 0.084(0.049 - 0.12)     |
| <b>United States of America</b>     | 94561<br>(58951 - 140866) | 171.59<br>(106.97 - 255.61) | 108427<br>(67960 - 161195) | 167.75<br>(105.14 - 249.39) | -0.072(-0.101 - -0.043) |
| <b>United States Virgin Islands</b> | 57<br>(28 - 97)           | 201.36<br>(100.4 - 346.81)  | 39<br>(20 - 68)            | 205.2<br>(103.6 - 355.29)   | 0.061(0.04 - 0.081)     |

|                                           |                         |                            |                         |                             |                       |
|-------------------------------------------|-------------------------|----------------------------|-------------------------|-----------------------------|-----------------------|
| <b>Uruguay</b>                            | 1631<br>(813 - 2777)    | 212.8<br>(106.02 - 362.34) | 1773<br>(895 - 3001)    | 238.48<br>(120.42 - 403.74) | 0.403(0.347 - 0.458)  |
| <b>Uzbekistan</b>                         | 6371<br>(3168 - 11308)  | 99.68<br>(49.56 - 176.93)  | 9223<br>(4619 - 16289)  | 103.04<br>(51.6 - 181.98)   | 0.117(0.067 - 0.166)  |
| <b>Vanuatu</b>                            | 23<br>(11 - 40)         | 48.02<br>(23.98 - 83.74)   | 44<br>(22 - 77)         | 49.32<br>(24.77 - 86.33)    | 0.088(0.045 - 0.131)  |
| <b>Venezuela (Bolivarian Republic of)</b> | 11019<br>(5683 - 18791) | 183.82<br>(94.8 - 313.47)  | 12525<br>(6261 - 21237) | 186.76<br>(93.35 - 316.64)  | 0.053(-0.016 - 0.122) |
| <b>Viet Nam</b>                           | 13441<br>(6657 - 23082) | 62.36<br>(30.89 - 107.09)  | 13830<br>(6993 - 23101) | 65.58<br>(33.16 - 109.54)   | 0.183(0.1 - 0.265)    |
| <b>Yemen</b>                              | 6344<br>(3194 - 10927)  | 150.24<br>(75.65 - 258.78) | 16155<br>(8212 - 28165) | 158.95<br>(80.8 - 277.12)   | 0.202(0.151 - 0.253)  |
| <b>Zambia</b>                             | 3276<br>(1630 - 5619)   | 118.15<br>(58.76 - 202.63) | 7416<br>(3653 - 12692)  | 120.45<br>(59.33 - 206.15)  | 0.073(0.042 - 0.104)  |
| <b>Zimbabwe</b>                           | 3951<br>(1955 - 6860)   | 110.08<br>(54.47 - 191.12) | 5560<br>(2712 - 9788)   | 113.52<br>(55.37 - 199.82)  | 0.115(0.068 - 0.162)  |

**Supplement table S6: The prevalence of bipolar disorder aged 10-24 years and its average annual percentage change (AAPC) from 1990 to 2019 at 204 countries levels**

| Location                   | 1990                      |                              | 2019                       |                               | AAPC<br>(95% CI)        |
|----------------------------|---------------------------|------------------------------|----------------------------|-------------------------------|-------------------------|
|                            | Case (95% UI)             | Rate (per 100000 population) | Case (95% UI)              | Rate (per 100000 population)  |                         |
| <b>Afghanistan</b>         | 28005<br>(17807 - 41087)  | 738.36<br>(469.48 - 1083.26) | 95141<br>(60801 - 139430)  | 732.01<br>(467.8 - 1072.78)   | -0.035(-0.078 - 0.008)  |
| <b>Albania</b>             | 4656<br>(2937 - 6809)     | 468.32<br>(295.41 - 684.89)  | 2920<br>(1843 - 4207)      | 515.3<br>(325.32 - 742.55)    | 0.342(0.269 - 0.415)    |
| <b>Algeria</b>             | 64184<br>(41300 - 92353)  | 752.03<br>(483.9 - 1082.08)  | 75825<br>(49018 - 108966)  | 775.88<br>(501.58 - 1115)     | 0.114(0.087 - 0.14)     |
| <b>American Samoa</b>      | 35<br>(22 - 52)           | 231.34<br>(143.84 - 347.52)  | 39<br>(24 - 59)            | 229.8<br>(142.49 - 345.04)    | -0.019(-0.053 - 0.015)  |
| <b>Andorra</b>             | 119<br>(78 - 171)         | 982.78<br>(645.88 - 1404.88) | 122<br>(80 - 174)          | 954.74<br>(628.26 - 1367.93)  | -0.118(-0.242 - 0.006)  |
| <b>Angola</b>              | 15725<br>(9921 - 23178)   | 490.21<br>(309.26 - 722.55)  | 46127<br>(29125 - 68105)   | 479.08<br>(302.49 - 707.34)   | -0.081(-0.094 - -0.068) |
| <b>Antigua and Barbuda</b> | 167<br>(109 - 245)        | 961.83<br>(624.99 - 1409.06) | 202<br>(131 - 294)         | 995.97<br>(649.26 - 1454.13)  | 0.12(0.111 - 0.129)     |
| <b>Argentina</b>           | 86029<br>(55493 - 127116) | 986.94<br>(636.62 - 1458.3)  | 120252<br>(77833 - 170789) | 1129.61<br>(731.14 - 1604.34) | 0.471(0.422 - 0.519)    |

|                   |                            |                               |                            |                               |                         |
|-------------------|----------------------------|-------------------------------|----------------------------|-------------------------------|-------------------------|
| <b>Armenia</b>    | 4168<br>(2668 - 6043)      | 478.46<br>(306.33 - 693.74)   | 2637<br>(1684 - 3818)      | 484.03<br>(309 - 700.76)      | 0.044(-0.02 - 0.107)    |
| <b>Australia</b>  | 53648<br>(39262 - 69926)   | 1351.25<br>(988.92 - 1761.25) | 61001<br>(44191 - 79808)   | 1343.44<br>(973.23 - 1757.63) | -0.02(-0.034 - -0.007)  |
| <b>Austria</b>    | 15896<br>(10499 - 22917)   | 978.28<br>(646.1 - 1410.39)   | 13433<br>(8754 - 19453)    | 948.8<br>(618.32 - 1374.02)   | -0.108(-0.152 - -0.064) |
| <b>Azerbaijan</b> | 9944<br>(6287 - 14607)     | 469.69<br>(296.96 - 689.98)   | 10443<br>(6626 - 15193)    | 473.79<br>(300.65 - 689.34)   | 0.028(-0.02 - 0.076)    |
| <b>Bahamas</b>    | 763<br>(487 - 1124)        | 943.77<br>(602.69 - 1390.58)  | 879<br>(561 - 1293)        | 942.29<br>(601.76 - 1387.06)  | -0.012(-0.052 - 0.029)  |
| <b>Bahrain</b>    | 1059<br>(695 - 1491)       | 818.26<br>(537.07 - 1151.59)  | 2042<br>(1335 - 2876)      | 822.91<br>(537.97 - 1158.97)  | 0.022(-0.216 - 0.26)    |
| <b>Bangladesh</b> | 109437<br>(67573 - 164051) | 310.98<br>(192.02 - 466.18)   | 148213<br>(92123 - 221136) | 327.07<br>(203.29 - 487.99)   | 0.172(0.161 - 0.182)    |
| <b>Barbados</b>   | 654<br>(424 - 943)         | 967.07<br>(627.49 - 1394.62)  | 555<br>(360 - 803)         | 967.39<br>(627.01 - 1398.59)  | -0.002(-0.021 - 0.017)  |
| <b>Belarus</b>    | 10412<br>(6678 - 15197)    | 469.62<br>(301.19 - 685.44)   | 6554<br>(4202 - 9551)      | 464.99<br>(298.11 - 677.6)    | -0.031(-0.075 - 0.013)  |

|                                         |                             |                               |                             |                               |                         |
|-----------------------------------------|-----------------------------|-------------------------------|-----------------------------|-------------------------------|-------------------------|
| <b>Belgium</b>                          | 18962<br>(12528 - 27689)    | 942.17<br>(622.48 - 1375.76)  | 17755<br>(11626 - 25557)    | 915.35<br>(599.38 - 1317.59)  | -0.099(-0.123 - -0.074) |
| <b>Belize</b>                           | 552<br>(352 - 790)          | 882.35<br>(562.15 - 1263.35)  | 1198<br>(763 - 1713)        | 929.69<br>(591.84 - 1329.25)  | 0.181(0.173 - 0.189)    |
| <b>Benin</b>                            | 6664<br>(4166 - 9865)       | 461.89<br>(288.75 - 683.79)   | 19552<br>(12247 - 28935)    | 476.34<br>(298.38 - 704.94)   | 0.108(0.101 - 0.114)    |
| <b>Bermuda</b>                          | 131<br>(84 - 185)           | 1047.4<br>(674.4 - 1488)      | 93<br>(60 - 133)            | 991.74<br>(635.69 - 1413.39)  | -0.191(-0.214 - -0.167) |
| <b>Bhutan</b>                           | 699<br>(438 - 1038)         | 325.46<br>(204.09 - 483.62)   | 736<br>(464 - 1088)         | 343.84<br>(216.77 - 508.41)   | 0.195(0.152 - 0.238)    |
| <b>Bolivia (Plurinational State of)</b> | 17063<br>(10993 - 24947)    | 852.36<br>(549.16 - 1246.2)   | 29364<br>(18955 - 42526)    | 905.62<br>(584.59 - 1311.53)  | 0.211(0.193 - 0.228)    |
| <b>Bosnia and Herzegovina</b>           | 5910<br>(3857 - 8547)       | 505.88<br>(330.21 - 731.61)   | 2974<br>(1948 - 4292)       | 523.05<br>(342.61 - 755.01)   | 0.104(0.006 - 0.203)    |
| <b>Botswana</b>                         | 2238<br>(1389 - 3311)       | 496.27<br>(308.03 - 734.19)   | 3422<br>(2136 - 5045)       | 526.18<br>(328.41 - 775.78)   | 0.202(0.191 - 0.213)    |
| <b>Brazil</b>                           | 569953<br>(429832 - 737875) | 1223.65<br>(922.82 - 1584.17) | 645934<br>(489482 - 835824) | 1285.87<br>(974.42 - 1663.89) | 0.179(0.158 - 0.199)    |

|                                 |                          |                              |                          |                               |                        |
|---------------------------------|--------------------------|------------------------------|--------------------------|-------------------------------|------------------------|
| <b>Brunei Darussalam</b>        | 462<br>(298 - 668)       | 606.83<br>(391.2 - 876.48)   | 704<br>(469 - 995)       | 655.96<br>(436.5 - 926.34)    | 0.267(0.23 - 0.304)    |
| <b>Bulgaria</b>                 | 7579<br>(4827 - 11075)   | 411.72<br>(262.22 - 601.57)  | 3933<br>(2507 - 5746)    | 408.36<br>(260.3 - 596.59)    | -0.034(-0.083 - 0.015) |
| <b>Burkina Faso</b>             | 13242<br>(8181 - 19834)  | 448.32<br>(276.99 - 671.49)  | 33620<br>(20930 - 50075) | 465.38<br>(289.72 - 693.15)   | 0.128(0.12 - 0.135)    |
| <b>Burundi</b>                  | 8790<br>(5462 - 13019)   | 524.56<br>(325.95 - 776.91)  | 20126<br>(12477 - 29882) | 525.17<br>(325.56 - 779.71)   | 0.008(-0.086 - 0.103)  |
| <b>Cabo Verde</b>               | 577<br>(367 - 840)       | 506.1<br>(321.52 - 737.06)   | 824<br>(526 - 1194)      | 535.93<br>(342.16 - 776.12)   | 0.201(0.169 - 0.234)   |
| <b>Cambodia</b>                 | 8374<br>(5219 - 12528)   | 261.7<br>(163.1 - 391.49)    | 12748<br>(7960 - 18961)  | 278.62<br>(173.98 - 414.44)   | 0.224(0.189 - 0.259)   |
| <b>Cameroon</b>                 | 15190<br>(9602 - 22447)  | 471.46<br>(298.03 - 696.72)  | 46264<br>(29171 - 68219) | 477.36<br>(301 - 703.9)       | 0.04(0.029 - 0.052)    |
| <b>Canada</b>                   | 58564<br>(41369 - 76299) | 1004.68<br>(709.7 - 1308.93) | 64679<br>(46741 - 82564) | 1022.92<br>(739.23 - 1305.79) | 0.066(0.048 - 0.084)   |
| <b>Central African Republic</b> | 4228<br>(2654 - 6288)    | 497.42<br>(312.2 - 739.68)   | 8711<br>(5469 - 12933)   | 497.72<br>(312.5 - 738.93)    | -0.003(-0.029 - 0.022) |

|                      |                             |                              |                             |                               |                         |
|----------------------|-----------------------------|------------------------------|-----------------------------|-------------------------------|-------------------------|
| <b>Chad</b>          | 8451<br>(5337 - 12393)      | 463.29<br>(292.59 - 679.36)  | 24611<br>(15522 - 36179)    | 458.64<br>(289.26 - 674.21)   | -0.035(-0.044 - -0.026) |
| <b>Chile</b>         | 37428<br>(23852 - 55043)    | 996.42<br>(634.99 - 1465.39) | 41086<br>(26480 - 59008)    | 1075.61<br>(693.23 - 1544.81) | 0.273(0.191 - 0.355)    |
| <b>China</b>         | 623103<br>(457239 - 815543) | 172.1<br>(126.29 - 225.25)   | 384472<br>(281759 - 501817) | 168.88<br>(123.76 - 220.43)   | -0.089(-0.184 - 0.007)  |
| <b>Colombia</b>      | 76705<br>(56209 - 101012)   | 749.95<br>(549.56 - 987.6)   | 92078<br>(67683 - 120258)   | 778.83<br>(572.48 - 1017.18)  | 0.135(0.122 - 0.147)    |
| <b>Comoros</b>       | 823<br>(517 - 1229)         | 534.23<br>(335.52 - 797.87)  | 1205<br>(758 - 1788)        | 561.09<br>(353.1 - 832.82)    | 0.168(0.162 - 0.174)    |
| <b>Congo</b>         | 4072<br>(2590 - 5945)       | 501.41<br>(318.97 - 732.09)  | 7784<br>(4954 - 11352)      | 498.22<br>(317.12 - 726.63)   | -0.02(-0.033 - -0.008)  |
| <b>Cook Islands</b>  | 13<br>(8 - 20)              | 229.28<br>(142.75 - 341.63)  | 10<br>(6 - 14)              | 233.34<br>(146.17 - 347.43)   | 0.052(0.003 - 0.101)    |
| <b>Costa Rica</b>    | 7948<br>(5172 - 11416)      | 863.03<br>(561.59 - 1239.65) | 10187<br>(6644 - 14577)     | 910.88<br>(594.07 - 1303.33)  | 0.189(0.167 - 0.212)    |
| <b>Côte d'Ivoire</b> | 18346<br>(11475 - 27443)    | 479.48<br>(299.91 - 717.25)  | 38839<br>(24266 - 58207)    | 481.16<br>(300.62 - 721.1)    | 0.01(-0.005 - 0.026)    |

|                                              |                          |                               |                            |                              |                         |
|----------------------------------------------|--------------------------|-------------------------------|----------------------------|------------------------------|-------------------------|
| <b>Croatia</b>                               | 5099<br>(3250 - 7394)    | 493.85<br>(314.78 - 716.09)   | 3441<br>(2198 - 4976)      | 507.76<br>(324.29 - 734.27)  | 0.101(0.067 - 0.134)    |
| <b>Cuba</b>                                  | 32297<br>(20772 - 46398) | 1044.63<br>(671.86 - 1500.75) | 19998<br>(12864 - 28707)   | 1005.1<br>(646.54 - 1442.84) | -0.139(-0.197 - -0.081) |
| <b>Cyprus</b>                                | 1736<br>(1134 - 2509)    | 913.02<br>(596.27 - 1319.19)  | 2050<br>(1341 - 2977)      | 947.49<br>(619.83 - 1376.31) | 0.133(0.103 - 0.164)    |
| <b>Czechia</b>                               | 11278<br>(7106 - 16317)  | 474.2<br>(298.8 - 686.09)     | 7182<br>(4542 - 10405)     | 472.47<br>(298.78 - 684.49)  | -0.019(-0.069 - 0.032)  |
| <b>Democratic People's Republic of Korea</b> | 8931<br>(5519 - 13489)   | 161.6<br>(99.86 - 244.09)     | 9070<br>(5602 - 13676)     | 164.97<br>(101.9 - 248.75)   | 0.073(0.037 - 0.109)    |
| <b>Democratic Republic of the Congo</b>      | 59461<br>(36683 - 87945) | 495.05<br>(305.41 - 732.2)    | 143678<br>(88640 - 212552) | 495.85<br>(305.91 - 733.54)  | 0.004(-0.011 - 0.019)   |
| <b>Denmark</b>                               | 11397<br>(7354 - 16820)  | 1042.47<br>(672.66 - 1538.43) | 10660<br>(6942 - 15681)    | 999.68<br>(650.99 - 1470.58) | -0.14(-0.2 - -0.079)    |
| <b>Djibouti</b>                              | 940<br>(592 - 1377)      | 559.46<br>(352.43 - 819.13)   | 1824<br>(1149 - 2669)      | 556.15<br>(350.35 - 813.8)   | -0.008(-0.047 - 0.031)  |
| <b>Dominica</b>                              | 206<br>(132 - 299)       | 899.37<br>(575.71 - 1305.32)  | 153<br>(98 - 222)          | 927.38<br>(595.22 - 1346.66) | 0.102(0.084 - 0.121)    |

|                           |                            |                              |                             |                              |                        |
|---------------------------|----------------------------|------------------------------|-----------------------------|------------------------------|------------------------|
| <b>Dominican Republic</b> | 22109<br>(14165 - 32099)   | 928.83<br>(595.08 - 1348.48) | 27555<br>(17730 - 40041)    | 950.32<br>(611.46 - 1380.93) | 0.079(0.061 - 0.098)   |
| <b>Ecuador</b>            | 29019<br>(18302 - 42819)   | 889.53<br>(561.02 - 1312.56) | 45609<br>(28840 - 67087)    | 928.95<br>(587.41 - 1366.43) | 0.154(0.13 - 0.178)    |
| <b>Egypt</b>              | 123175<br>(79618 - 179049) | 717.77<br>(463.95 - 1043.37) | 207208<br>(134110 - 301106) | 729.54<br>(472.18 - 1060.14) | 0.06(0.038 - 0.083)    |
| <b>El Salvador</b>        | 14344<br>(9159 - 20776)    | 806.84<br>(515.17 - 1168.63) | 15389<br>(10005 - 22285)    | 875.95<br>(569.53 - 1268.53) | 0.288(0.252 - 0.324)   |
| <b>Equatorial Guinea</b>  | 632<br>(390 - 936)         | 493.41<br>(304.7 - 730.33)   | 2725<br>(1691 - 4033)       | 513.55<br>(318.75 - 760.26)  | 0.139(0.127 - 0.152)   |
| <b>Eritrea</b>            | 5260<br>(3347 - 7850)      | 532.33<br>(338.8 - 794.48)   | 12427<br>(7912 - 18438)     | 550.64<br>(350.58 - 816.95)  | 0.118(0.102 - 0.135)   |
| <b>Estonia</b>            | 1534<br>(964 - 2209)       | 469.51<br>(295.18 - 676.31)  | 908<br>(571 - 1309)         | 459.78<br>(288.93 - 662.74)  | -0.086(-0.153 - -0.02) |
| <b>Eswatini</b>           | 1342<br>(838 - 2000)       | 487.75<br>(304.58 - 726.74)  | 1891<br>(1183 - 2797)       | 516.18<br>(323.09 - 763.55)  | 0.198(0.189 - 0.206)   |
| <b>Ethiopia</b>           | 85699<br>(62759 - 112380)  | 522.39<br>(382.56 - 685.03)  | 202538<br>(149032 - 265234) | 543.16<br>(399.67 - 711.3)   | 0.146(0.121 - 0.171)   |

|                |                            |                              |                            |                              |                         |
|----------------|----------------------------|------------------------------|----------------------------|------------------------------|-------------------------|
| <b>Fiji</b>    | 530<br>(324 - 786)         | 222.32<br>(136.07 - 329.82)  | 536<br>(329 - 793)         | 226.9<br>(139.24 - 336.08)   | 0.076(0.059 - 0.093)    |
| <b>Finland</b> | 8996<br>(5963 - 12801)     | 924.17<br>(612.58 - 1315.05) | 8302<br>(5611 - 11861)     | 904.65<br>(611.49 - 1292.55) | -0.079(-0.113 - -0.044) |
| <b>France</b>  | 119344<br>(79614 - 169613) | 944.37<br>(629.98 - 1342.14) | 110106<br>(73695 - 157233) | 911.26<br>(609.91 - 1301.29) | -0.124(-0.146 - -0.102) |
| <b>Gabon</b>   | 1551<br>(976 - 2310)       | 509<br>(320.33 - 757.91)     | 2806<br>(1771 - 4158)      | 527.82<br>(333.14 - 782.08)  | 0.126(0.12 - 0.133)     |
| <b>Gambia</b>  | 1512<br>(939 - 2238)       | 482.58<br>(299.73 - 714.24)  | 3763<br>(2336 - 5569)      | 490.68<br>(304.63 - 726.19)  | 0.057(0.047 - 0.067)    |
| <b>Georgia</b> | 6054<br>(3772 - 8738)      | 471.33<br>(293.66 - 680.34)  | 2951<br>(1841 - 4255)      | 470.63<br>(293.55 - 678.66)  | -0.01(-0.046 - 0.026)   |
| <b>Germany</b> | 125568<br>(92243 - 164138) | 843.13<br>(619.37 - 1102.11) | 104882<br>(77423 - 136028) | 820.84<br>(605.94 - 1064.6)  | -0.088(-0.128 - -0.047) |
| <b>Ghana</b>   | 22487<br>(14127 - 33308)   | 476.95<br>(299.63 - 706.46)  | 49338<br>(31052 - 72741)   | 496.76<br>(312.65 - 732.4)   | 0.14(0.137 - 0.144)     |
| <b>Greece</b>  | 21663<br>(14245 - 31640)   | 924.61<br>(608.02 - 1350.44) | 14138<br>(9341 - 20297)    | 911.55<br>(602.3 - 1308.68)  | -0.05(-0.067 - -0.033)  |

|                      |                          |                              |                          |                              |                         |
|----------------------|--------------------------|------------------------------|--------------------------|------------------------------|-------------------------|
| <b>Greenland</b>     | 102<br>(67 - 147)        | 739.77<br>(482 - 1064.24)    | 85<br>(55 - 125)         | 740.04<br>(481.37 - 1091.29) | 0.011(-0.052 - 0.074)   |
| <b>Grenada</b>       | 236<br>(151 - 338)       | 900.03<br>(575.78 - 1289.03) | 257<br>(165 - 367)       | 986.06<br>(634.16 - 1408.01) | 0.325(0.299 - 0.351)    |
| <b>Guam</b>          | 97<br>(60 - 141)         | 246.46<br>(153.32 - 360.49)  | 98<br>(61 - 144)         | 235.72<br>(146.25 - 345.76)  | -0.154(-0.187 - -0.121) |
| <b>Guatemala</b>     | 19178<br>(12117 - 27941) | 770<br>(486.53 - 1121.86)    | 47175<br>(29982 - 68234) | 835.27<br>(530.86 - 1208.12) | 0.289(0.264 - 0.313)    |
| <b>Guinea</b>        | 8208<br>(5197 - 12072)   | 464.97<br>(294.39 - 683.87)  | 18865<br>(11930 - 27764) | 464.58<br>(293.8 - 683.76)   | -0.013(-0.036 - 0.01)   |
| <b>Guinea-Bissau</b> | 1501<br>(949 - 2208)     | 464.59<br>(293.6 - 683.12)   | 2996<br>(1895 - 4416)    | 477.73<br>(302.14 - 704.21)  | 0.095(0.087 - 0.104)    |
| <b>Guyana</b>        | 2318<br>(1489 - 3396)    | 894.09<br>(574.3 - 1309.84)  | 2097<br>(1351 - 3045)    | 942.58<br>(607.41 - 1368.68) | 0.187(0.154 - 0.221)    |
| <b>Haiti</b>         | 16290<br>(10397 - 23639) | 839.81<br>(536.01 - 1218.66) | 31940<br>(20421 - 46188) | 868.63<br>(555.37 - 1256.11) | 0.118(0.103 - 0.134)    |
| <b>Honduras</b>      | 11768<br>(7352 - 17312)  | 767.81<br>(479.71 - 1129.58) | 26338<br>(16687 - 38408) | 839.63<br>(531.94 - 1224.38) | 0.311(0.303 - 0.319)    |

|                                   |                             |                              |                               |                               |                         |
|-----------------------------------|-----------------------------|------------------------------|-------------------------------|-------------------------------|-------------------------|
| <b>Hungary</b>                    | 10904<br>(6909 - 15808)     | 472.77<br>(299.57 - 685.4)   | 7475<br>(4732 - 10801)        | 499.9<br>(316.5 - 722.33)     | 0.192(0.164 - 0.22)     |
| <b>Iceland</b>                    | 572<br>(379 - 839)          | 904.74<br>(599.15 - 1326.87) | 631<br>(423 - 902)            | 926.33<br>(621.82 - 1324.54)  | 0.085(0.027 - 0.143)    |
| <b>India</b>                      | 719940<br>(524073 - 942194) | 279.17<br>(203.22 - 365.35)  | 1159672<br>(846769 - 1514941) | 291.86<br>(213.11 - 381.28)   | 0.149(0.136 - 0.162)    |
| <b>Indonesia</b>                  | 157643<br>(115593 - 204774) | 265.05<br>(194.35 - 344.29)  | 186428<br>(136594 - 241626)   | 274.62<br>(201.21 - 355.92)   | 0.122(0.11 - 0.133)     |
| <b>Iran (Islamic Republic of)</b> | 144126<br>(107282 - 187237) | 750.67<br>(558.77 - 975.21)  | 141635<br>(106364 - 183084)   | 804.61<br>(604.24 - 1040.08)  | 0.238(0.193 - 0.284)    |
| <b>Iraq</b>                       | 37406<br>(23766 - 54867)    | 657.13<br>(417.52 - 963.88)  | 93118<br>(59717 - 135939)     | 705.25<br>(452.28 - 1029.57)  | 0.246(0.187 - 0.304)    |
| <b>Ireland</b>                    | 6495<br>(4609 - 8800)       | 666.91<br>(473.25 - 903.58)  | 6450<br>(4599 - 8794)         | 676.24<br>(482.22 - 922.04)   | 0.043(0.007 - 0.08)     |
| <b>Israel</b>                     | 14149<br>(9276 - 20572)     | 1040.05<br>(681.9 - 1512.21) | 22982<br>(15238 - 33464)      | 1061.11<br>(703.55 - 1545.08) | 0.073(0.047 - 0.099)    |
| <b>Italy</b>                      | 106476<br>(79746 - 136190)  | 850.54<br>(637.02 - 1087.9)  | 73558<br>(55111 - 94770)      | 844.15<br>(632.45 - 1087.59)  | -0.029(-0.055 - -0.003) |

|                                             |                             |                             |                            |                              |                         |
|---------------------------------------------|-----------------------------|-----------------------------|----------------------------|------------------------------|-------------------------|
| <b>Jamaica</b>                              | 7297<br>(4761 - 10684)      | 955.42<br>(623.34 - 1398.9) | 7501<br>(4905 - 10890)     | 1013.4<br>(662.68 - 1471.26) | 0.2(0.172 - 0.228)      |
| <b>Japan</b>                                | 184650<br>(137989 - 238644) | 657.02<br>(490.99 - 849.14) | 112787<br>(84326 - 145965) | 637.17<br>(476.39 - 824.6)   | -0.111(-0.177 - -0.046) |
| <b>Jordan</b>                               | 10793<br>(6941 - 15507)     | 789.31<br>(507.63 - 1134)   | 28249<br>(18179 - 40608)   | 797.25<br>(513.05 - 1146.06) | 0.031(-0.011 - 0.073)   |
| <b>Kazakhstan</b>                           | 19638<br>(12497 - 28751)    | 449.57<br>(286.1 - 658.2)   | 17548<br>(11191 - 25678)   | 449.06<br>(286.4 - 657.13)   | -0.015(-0.125 - 0.095)  |
| <b>Kenya</b>                                | 41193<br>(30315 - 53667)    | 519.79<br>(382.52 - 677.18) | 92675<br>(68114 - 120680)  | 540.53<br>(397.28 - 703.87)  | 0.137(0.114 - 0.159)    |
| <b>Kiribati</b>                             | 51<br>(32 - 76)             | 226.78<br>(141.06 - 339.94) | 76<br>(48 - 115)           | 220.72<br>(137.07 - 331)     | -0.093(-0.118 - -0.069) |
| <b>Kuwait</b>                               | 4014<br>(2611 - 5767)       | 846.98<br>(550.9 - 1216.86) | 6865<br>(4463 - 9870)      | 855.59<br>(556.24 - 1230.03) | 0.023(-0.05 - 0.096)    |
| <b>Kyrgyzstan</b>                           | 5799<br>(3653 - 8406)       | 448.65<br>(282.58 - 650.3)  | 7879<br>(4996 - 11345)     | 464.26<br>(294.4 - 668.53)   | 0.123(0.089 - 0.156)    |
| <b>Lao People's<br/>Democratic Republic</b> | 3408<br>(2124 - 5108)       | 263.15<br>(164.03 - 394.46) | 6010<br>(3768 - 8951)      | 285.42<br>(178.92 - 425.09)  | 0.279(0.256 - 0.301)    |

|                   |                          |                              |                          |                              |                         |
|-------------------|--------------------------|------------------------------|--------------------------|------------------------------|-------------------------|
| <b>Latvia</b>     | 2599<br>(1604 - 3776)    | 481.43<br>(297.2 - 699.53)   | 1259<br>(774 - 1830)     | 459.06<br>(282.15 - 667.47)  | -0.165(-0.232 - -0.097) |
| <b>Lebanon</b>    | 9148<br>(6519 - 12492)   | 975.05<br>(694.85 - 1331.5)  | 10801<br>(7733 - 14702)  | 978.46<br>(700.57 - 1331.92) | 0.026(-0.023 - 0.074)   |
| <b>Lesotho</b>    | 2932<br>(1846 - 4355)    | 490.69<br>(308.97 - 728.95)  | 3426<br>(2168 - 5061)    | 525.18<br>(332.3 - 775.91)   | 0.235(0.217 - 0.252)    |
| <b>Liberia</b>    | 2534<br>(1562 - 3714)    | 438.28<br>(270.21 - 642.33)  | 7620<br>(4769 - 11105)   | 480.05<br>(300.45 - 699.6)   | 0.271(0.138 - 0.404)    |
| <b>Libya</b>      | 10771<br>(6897 - 15460)  | 753.21<br>(482.35 - 1081.12) | 14199<br>(9161 - 20470)  | 820.43<br>(529.33 - 1182.73) | 0.292(0.235 - 0.349)    |
| <b>Lithuania</b>  | 3940<br>(2483 - 5735)    | 481.46<br>(303.42 - 700.87)  | 2146<br>(1359 - 3129)    | 496<br>(314.12 - 723.11)     | 0.107(0.077 - 0.137)    |
| <b>Luxembourg</b> | 691<br>(454 - 986)       | 956.34<br>(628.18 - 1365.45) | 978<br>(642 - 1407)      | 933<br>(612.81 - 1342.5)     | -0.087(-0.123 - -0.052) |
| <b>Madagascar</b> | 20171<br>(12449 - 29427) | 526.72<br>(325.07 - 768.41)  | 47500<br>(29344 - 69224) | 539.32<br>(333.17 - 785.98)  | 0.082(0.076 - 0.087)    |
| <b>Malawi</b>     | 16304<br>(10172 - 24114) | 534.21<br>(333.29 - 790.08)  | 35110<br>(21760 - 51797) | 528.34<br>(327.45 - 779.44)  | -0.05(-0.098 - -0.001)  |

|                                         |                             |                              |                             |                              |                        |
|-----------------------------------------|-----------------------------|------------------------------|-----------------------------|------------------------------|------------------------|
| <b>Malaysia</b>                         | 15037<br>(9335 - 22214)     | 279.48<br>(173.49 - 412.88)  | 24424<br>(15218 - 36194)    | 299.11<br>(186.36 - 443.24)  | 0.236(0.207 - 0.265)   |
| <b>Maldives</b>                         | 195<br>(121 - 294)          | 272.3<br>(168.79 - 410.76)   | 309<br>(196 - 460)          | 303.75<br>(192.73 - 452.64)  | 0.388(0.331 - 0.444)   |
| <b>Mali</b>                             | 11749<br>(7222 - 17214)     | 461.8<br>(283.88 - 676.61)   | 34363<br>(21085 - 50334)    | 470.92<br>(288.96 - 689.8)   | 0.071(0.045 - 0.098)   |
| <b>Malta</b>                            | 732<br>(479 - 1078)         | 894.45<br>(585.04 - 1317.4)  | 627<br>(418 - 899)          | 956.35<br>(637.39 - 1370.68) | 0.235(0.19 - 0.281)    |
| <b>Marshall Islands</b>                 | 31<br>(19 - 47)             | 205.99<br>(125.29 - 309.03)  | 36<br>(22 - 54)             | 221.56<br>(136.55 - 329.54)  | 0.257(0.225 - 0.288)   |
| <b>Mauritania</b>                       | 3056<br>(1951 - 4442)       | 480.22<br>(306.54 - 698.06)  | 6465<br>(4122 - 9411)       | 479.93<br>(306.02 - 698.65)  | -0.004(-0.013 - 0.004) |
| <b>Mauritius</b>                        | 932<br>(591 - 1370)         | 286.2<br>(181.43 - 420.61)   | 815<br>(518 - 1196)         | 303.64<br>(192.87 - 445.29)  | 0.207(0.155 - 0.259)   |
| <b>Mexico</b>                           | 266716<br>(199339 - 346486) | 916.47<br>(684.95 - 1190.56) | 310939<br>(232968 - 401667) | 952.81<br>(713.88 - 1230.83) | 0.136(0.125 - 0.147)   |
| <b>Micronesia (Federated States of)</b> | 72<br>(44 - 108)            | 209.1<br>(128.54 - 313.07)   | 73<br>(45 - 109)            | 227.16<br>(141.25 - 339.98)  | 0.286(0.277 - 0.295)   |

|                   |                          |                              |                           |                              |                         |
|-------------------|--------------------------|------------------------------|---------------------------|------------------------------|-------------------------|
| <b>Monaco</b>     | 43<br>(28 - 62)          | 985.66<br>(637.82 - 1419.62) | 49<br>(32 - 70)           | 932.4<br>(614.64 - 1330.78)  | -0.193(-0.233 - -0.154) |
| <b>Mongolia</b>   | 3091<br>(1947 - 4577)    | 437.63<br>(275.71 - 648.06)  | 3282<br>(2072 - 4816)     | 449.94<br>(284 - 660.17)     | 0.096(0.042 - 0.151)    |
| <b>Montenegro</b> | 773<br>(493 - 1115)      | 487.69<br>(311.06 - 703.99)  | 600<br>(384 - 865)        | 500.92<br>(320.66 - 721.98)  | 0.097(0.074 - 0.12)     |
| <b>Morocco</b>    | 61225<br>(39285 - 88400) | 755.16<br>(484.56 - 1090.34) | 72041<br>(46219 - 103610) | 774.61<br>(496.96 - 1114.05) | 0.087(0.076 - 0.098)    |
| <b>Mozambique</b> | 20500<br>(12940 - 30475) | 502.59<br>(317.23 - 747.13)  | 51631<br>(32762 - 76592)  | 522.77<br>(331.72 - 775.51)  | 0.144(0.122 - 0.166)    |
| <b>Myanmar</b>    | 34513<br>(21658 - 51381) | 269.11<br>(168.88 - 400.63)  | 40448<br>(25322 - 60206)  | 276.7<br>(173.22 - 411.86)   | 0.097(0.092 - 0.101)    |
| <b>Namibia</b>    | 2431<br>(1518 - 3581)    | 512.45<br>(320 - 754.8)      | 3845<br>(2422 - 5652)     | 526.93<br>(331.83 - 774.49)  | 0.097(0.085 - 0.11)     |
| <b>Nauru</b>      | 7<br>(4 - 10)            | 217.9<br>(135.18 - 321.56)   | 7<br>(5 - 11)             | 221.59<br>(137.34 - 326.79)  | 0.056(0.042 - 0.069)    |
| <b>Nepal</b>      | 18253<br>(11344 - 27536) | 306.73<br>(190.63 - 462.72)  | 31390<br>(19534 - 47405)  | 328.62<br>(204.5 - 496.28)   | 0.241(0.226 - 0.255)    |

|                                 |                            |                                |                             |                               |                         |
|---------------------------------|----------------------------|--------------------------------|-----------------------------|-------------------------------|-------------------------|
| <b>Netherlands</b>              | 29432<br>(24372 - 35070)   | 898.43<br>(743.96 - 1070.52)   | 26272<br>(21409 - 31441)    | 865.38<br>(705.2 - 1035.63)   | -0.13(-0.144 - -0.116)  |
| <b>New Zealand</b>              | 15151<br>(11489 - 19434)   | 1800.11<br>(1364.93 - 2308.95) | 15906<br>(11851 - 20668)    | 1796.84<br>(1338.8 - 2334.76) | -0.01(-0.033 - 0.013)   |
| <b>Nicaragua</b>                | 10536<br>(6752 - 15310)    | 804.9<br>(515.78 - 1169.56)    | 16402<br>(10569 - 23662)    | 862.4<br>(555.71 - 1244.1)    | 0.24(0.23 - 0.249)      |
| <b>Niger</b>                    | 11223<br>(7089 - 16594)    | 458.97<br>(289.9 - 678.63)     | 35434<br>(22304 - 52403)    | 459.58<br>(289.29 - 679.68)   | 0.007(-0.008 - 0.022)   |
| <b>Nigeria</b>                  | 131917<br>(96321 - 171747) | 468.54<br>(342.11 - 610.01)    | 333986<br>(244789 - 436389) | 460.12<br>(337.24 - 601.2)    | -0.064(-0.069 - -0.058) |
| <b>Niue</b>                     | 1<br>(1 - 2)               | 217.35<br>(136.53 - 322.91)    | 1<br>(1 - 1)                | 224.79<br>(141.35 - 332.83)   | 0.136(0.051 - 0.221)    |
| <b>North Macedonia</b>          | 2533<br>(1598 - 3663)      | 487.89<br>(307.76 - 705.63)    | 1964<br>(1244 - 2813)       | 515.33<br>(326.47 - 738.09)   | 0.206(0.135 - 0.276)    |
| <b>Northern Mariana Islands</b> | 32<br>(20 - 47)            | 253.53<br>(159.31 - 370.34)    | 27<br>(17 - 39)             | 251.42<br>(156.61 - 369.14)   | -0.045(-0.531 - 0.444)  |
| <b>Norway</b>                   | 7620<br>(5694 - 9822)      | 831.24<br>(621.14 - 1071.44)   | 7785<br>(5806 - 10042)      | 792.88<br>(591.31 - 1022.79)  | -0.158(-0.196 - -0.119) |

|                         |                            |                               |                             |                               |                         |
|-------------------------|----------------------------|-------------------------------|-----------------------------|-------------------------------|-------------------------|
| <b>Oman</b>             | 3430<br>(2305 - 4840)      | 624.95<br>(419.97 - 881.77)   | 6909<br>(4708 - 9584)       | 728.39<br>(496.31 - 1010.37)  | 0.518(0.373 - 0.664)    |
| <b>Pakistan</b>         | 106668<br>(78013 - 140211) | 298.8<br>(218.53 - 392.76)    | 225362<br>(165022 - 294894) | 307.08<br>(224.86 - 401.82)   | 0.093(0.084 - 0.102)    |
| <b>Palau</b>            | 11<br>(7 - 16)             | 233.73<br>(142.77 - 346.56)   | 8<br>(5 - 12)               | 230.6<br>(141.05 - 341.81)    | -0.047(-0.067 - -0.027) |
| <b>Palestine</b>        | 5238<br>(3398 - 7598)      | 774.06<br>(502.21 - 1122.82)  | 12809<br>(8334 - 18476)     | 795.6<br>(517.65 - 1147.56)   | 0.095(0.074 - 0.116)    |
| <b>Panama</b>           | 6404<br>(4132 - 9381)      | 849.4<br>(548.07 - 1244.31)   | 9220<br>(5961 - 13457)      | 859.96<br>(556.03 - 1255.21)  | 0.037(0.002 - 0.072)    |
| <b>Papua New Guinea</b> | 2854<br>(1775 - 4245)      | 218.12<br>(135.66 - 324.45)   | 6529<br>(4056 - 9691)       | 223.74<br>(138.99 - 332.11)   | 0.089(0.077 - 0.101)    |
| <b>Paraguay</b>         | 14022<br>(8906 - 20039)    | 1137.32<br>(722.38 - 1625.37) | 23463<br>(14906 - 33501)    | 1202.58<br>(763.97 - 1717.06) | 0.194(0.179 - 0.21)     |
| <b>Peru</b>             | 63316<br>(40746 - 92401)   | 899.83<br>(579.07 - 1313.18)  | 80758<br>(52264 - 117164)   | 930.37<br>(602.11 - 1349.79)  | 0.117(0.106 - 0.128)    |
| <b>Philippines</b>      | 54863<br>(40376 - 71383)   | 267.42<br>(196.8 - 347.94)    | 88768<br>(65252 - 115857)   | 276.91<br>(203.55 - 361.41)   | 0.119(0.101 - 0.137)    |

|                            |                             |                              |                            |                               |                        |
|----------------------------|-----------------------------|------------------------------|----------------------------|-------------------------------|------------------------|
| <b>Poland</b>              | 39017<br>(28907 - 50814)    | 454.17<br>(336.48 - 591.48)  | 28583<br>(21215 - 36848)   | 486.96<br>(361.44 - 627.78)   | 0.248(0.221 - 0.275)   |
| <b>Portugal</b>            | 22780<br>(16095 - 31465)    | 913.47<br>(645.42 - 1261.77) | 15535<br>(10990 - 20837)   | 930.68<br>(658.42 - 1248.34)  | 0.055(0.018 - 0.093)   |
| <b>Puerto Rico</b>         | 9423<br>(6082 - 13770)      | 959.31<br>(619.19 - 1401.81) | 6768<br>(4400 - 9837)      | 1005.09<br>(653.46 - 1460.81) | 0.164(0.134 - 0.194)   |
| <b>Qatar</b>               | 771<br>(494 - 1121)         | 778.56<br>(498.47 - 1132.25) | 4335<br>(2771 - 6362)      | 850.03<br>(543.41 - 1247.53)  | 0.315(0.233 - 0.398)   |
| <b>Republic of Korea</b>   | 66234<br>(43361 - 95787)    | 503.47<br>(329.6 - 728.11)   | 45176<br>(30223 - 64137)   | 539.33<br>(360.82 - 765.7)    | 0.239(0.184 - 0.294)   |
| <b>Republic of Moldova</b> | 4620<br>(2942 - 6762)       | 449.01<br>(285.95 - 657.17)  | 2884<br>(1841 - 4193)      | 472.86<br>(301.75 - 687.44)   | 0.184(0.134 - 0.234)   |
| <b>Romania</b>             | 35400<br>(24035 - 50045)    | 599.13<br>(406.79 - 847)     | 18476<br>(12530 - 26224)   | 593.4<br>(402.43 - 842.26)    | -0.038(-0.147 - 0.072) |
| <b>Russian Federation</b>  | 140179<br>(103659 - 182348) | 444.99<br>(329.05 - 578.85)  | 100090<br>(74111 - 130332) | 438.92<br>(325 - 571.55)      | -0.05(-0.125 - 0.025)  |
| <b>Rwanda</b>              | 11940<br>(7437 - 17840)     | 528.33<br>(329.08 - 789.41)  | 22830<br>(14253 - 34172)   | 544.37<br>(339.84 - 814.81)   | 0.107(0 - 0.214)       |

|                                         |                          |                              |                           |                              |                       |
|-----------------------------------------|--------------------------|------------------------------|---------------------------|------------------------------|-----------------------|
| <b>Saint Kitts and Nevis</b>            | 116<br>(74 - 169)        | 915.58<br>(582.74 - 1335.06) | 126<br>(81 - 184)         | 959.37<br>(613.02 - 1398.37) | 0.159(0.143 - 0.174)  |
| <b>Saint Lucia</b>                      | 419<br>(268 - 609)       | 923.93<br>(592.14 - 1344.15) | 390<br>(252 - 562)        | 988.88<br>(638.66 - 1424.06) | 0.238(0.227 - 0.249)  |
| <b>Saint Vincent and the Grenadines</b> | 337<br>(213 - 494)       | 901.07<br>(569.18 - 1321)    | 257<br>(165 - 376)        | 950.94<br>(609.12 - 1390.9)  | 0.186(0.171 - 0.202)  |
| <b>Samoa</b>                            | 129<br>(78 - 190)        | 218.94<br>(133.32 - 323.67)  | 150<br>(91 - 222)         | 218.7<br>(133.29 - 323.1)    | -0.004(-0.018 - 0.01) |
| <b>San Marino</b>                       | 54<br>(35 - 77)          | 965.8<br>(625.28 - 1370.05)  | 57<br>(38 - 83)           | 942.99<br>(620.19 - 1353.81) | -0.086(-0.1 - -0.072) |
| <b>Sao Tome and Principe</b>            | 191<br>(119 - 282)       | 471.03<br>(294.6 - 695.97)   | 332<br>(209 - 491)        | 491.8<br>(309.17 - 727.33)   | 0.149(0.127 - 0.17)   |
| <b>Saudi Arabia</b>                     | 40268<br>(26126 - 59518) | 791.75<br>(513.69 - 1170.23) | 71682<br>(46808 - 105609) | 865.8<br>(565.37 - 1275.59)  | 0.311(0.298 - 0.324)  |
| <b>Senegal</b>                          | 11425<br>(7120 - 16736)  | 472.33<br>(294.34 - 691.9)   | 24220<br>(15155 - 35482)  | 484.31<br>(303.04 - 709.52)  | 0.087(0.081 - 0.093)  |
| <b>Serbia</b>                           | 9996<br>(6337 - 14407)   | 477.29<br>(302.56 - 687.87)  | 7803<br>(4982 - 11227)    | 496.68<br>(317.08 - 714.6)   | 0.116(0.007 - 0.225)  |

|                        |                          |                              |                          |                              |                         |
|------------------------|--------------------------|------------------------------|--------------------------|------------------------------|-------------------------|
| <b>Seychelles</b>      | 64<br>(41 - 95)          | 287.24<br>(181.92 - 424.11)  | 63<br>(40 - 92)          | 294.16<br>(185.75 - 433.85)  | 0.087(0.065 - 0.109)    |
| <b>Sierra Leone</b>    | 5095<br>(3177 - 7591)    | 475.74<br>(296.71 - 708.85)  | 13368<br>(8338 - 19907)  | 486.15<br>(303.22 - 723.93)  | 0.083(0.037 - 0.129)    |
| <b>Singapore</b>       | 6975<br>(4754 - 9595)    | 845.75<br>(576.47 - 1163.51) | 6359<br>(4328 - 9018)    | 847.38<br>(576.81 - 1201.78) | 0.035(-0.073 - 0.143)   |
| <b>Slovakia</b>        | 5986<br>(3823 - 8731)    | 470.22<br>(300.25 - 685.81)  | 4194<br>(2721 - 6115)    | 498.65<br>(323.49 - 727.07)  | 0.211(0.151 - 0.271)    |
| <b>Slovenia</b>        | 2189<br>(1405 - 3206)    | 494.1<br>(317.17 - 723.76)   | 1430<br>(918 - 2094)     | 492.05<br>(315.72 - 720.53)  | -0.008(-0.029 - 0.012)  |
| <b>Solomon Islands</b> | 248<br>(150 - 372)       | 214.29<br>(130.07 - 322.07)  | 442<br>(270 - 663)       | 218.21<br>(132.95 - 327.09)  | 0.062(0.058 - 0.067)    |
| <b>Somalia</b>         | 11145<br>(7098 - 16416)  | 486.49<br>(309.85 - 716.59)  | 36165<br>(23126 - 52844) | 527.99<br>(337.64 - 771.52)  | 0.303(0.236 - 0.369)    |
| <b>South Africa</b>    | 60853<br>(44695 - 79201) | 510.26<br>(374.78 - 664.12)  | 72970<br>(53787 - 94744) | 520.27<br>(383.49 - 675.51)  | 0.061(0.023 - 0.099)    |
| <b>South Sudan</b>     | 10949<br>(6887 - 15992)  | 547.42<br>(344.34 - 799.57)  | 17055<br>(10667 - 25089) | 527.48<br>(329.92 - 775.96)  | -0.136(-0.165 - -0.106) |

|                                   |                           |                              |                           |                              |                         |
|-----------------------------------|---------------------------|------------------------------|---------------------------|------------------------------|-------------------------|
| <b>Spain</b>                      | 91312<br>(60730 - 132387) | 937.45<br>(623.48 - 1359.14) | 63747<br>(41851 - 92023)  | 922.32<br>(605.51 - 1331.43) | -0.054(-0.087 - -0.021) |
| <b>Sri Lanka</b>                  | 14375<br>(9052 - 21342)   | 277.34<br>(174.64 - 411.76)  | 14418<br>(9077 - 21415)   | 279.66<br>(176.07 - 415.4)   | 0.03(-0.015 - 0.075)    |
| <b>Sudan</b>                      | 47198<br>(29937 - 68687)  | 731.46<br>(463.96 - 1064.49) | 99605<br>(63136 - 144604) | 740.56<br>(469.41 - 1075.13) | 0.042(0.034 - 0.05)     |
| <b>Suriname</b>                   | 1112<br>(724 - 1604)      | 921.8<br>(599.94 - 1330.08)  | 1291<br>(839 - 1861)      | 908.31<br>(590.45 - 1309.57) | -0.047(-0.086 - -0.007) |
| <b>Sweden</b>                     | 16314<br>(11980 - 21044)  | 985.44<br>(723.63 - 1271.19) | 16235<br>(12100 - 21014)  | 939.78<br>(700.41 - 1216.44) | -0.162(-0.218 - -0.107) |
| <b>Switzerland</b>                | 13384<br>(8887 - 19313)   | 1006.6<br>(668.38 - 1452.54) | 13342<br>(8923 - 19072)   | 985.22<br>(658.87 - 1408.29) | -0.071(-0.099 - -0.043) |
| <b>Syrian Arab Republic</b>       | 32419<br>(20400 - 48110)  | 743.74<br>(468 - 1103.71)    | 38728<br>(24382 - 57437)  | 793.97<br>(499.86 - 1177.52) | 0.23(0.184 - 0.277)     |
| <b>Taiwan (Province of China)</b> | 9273<br>(5870 - 13855)    | 162.19<br>(102.67 - 242.31)  | 6732<br>(4258 - 9977)     | 178.39<br>(112.84 - 264.36)  | 0.333(0.254 - 0.412)    |
| <b>Tajikistan</b>                 | 7386<br>(4584 - 10732)    | 445.45<br>(276.48 - 647.22)  | 12421<br>(7734 - 17969)   | 460.35<br>(286.61 - 665.94)  | 0.114(0.072 - 0.156)    |

|                            |                            |                              |                             |                              |                         |
|----------------------------|----------------------------|------------------------------|-----------------------------|------------------------------|-------------------------|
| <b>Thailand</b>            | 50863<br>(32005 - 75298)   | 284.4<br>(178.95 - 421.02)   | 39019<br>(24590 - 57793)    | 297.33<br>(187.38 - 440.39)  | 0.149(0.116 - 0.182)    |
| <b>Timor-Leste</b>         | 611<br>(385 - 918)         | 265.71<br>(167.26 - 398.79)  | 1194<br>(753 - 1806)        | 261.72<br>(165.06 - 395.92)  | -0.053(-0.065 - -0.041) |
| <b>Togo</b>                | 5596<br>(3451 - 8321)      | 469.17<br>(289.39 - 697.71)  | 11807<br>(7282 - 17515)     | 478.19<br>(294.93 - 709.35)  | 0.064(0.059 - 0.07)     |
| <b>Tokelau</b>             | 1<br>(1 - 1)               | 216.38<br>(133.74 - 321.15)  | 1<br>(1 - 1)                | 225.68<br>(139.66 - 333.29)  | 0.155(-0.051 - 0.361)   |
| <b>Tonga</b>               | 74<br>(46 - 109)           | 221.57<br>(138.33 - 326.02)  | 70<br>(44 - 103)            | 225.85<br>(141.24 - 332.7)   | 0.064(0.055 - 0.074)    |
| <b>Trinidad and Tobago</b> | 3118<br>(1992 - 4488)      | 907.85<br>(579.99 - 1306.94) | 2534<br>(1622 - 3649)       | 930.67<br>(595.48 - 1339.95) | 0.082(0 - 0.164)        |
| <b>Tunisia</b>             | 21225<br>(13889 - 30495)   | 793.99<br>(519.55 - 1140.75) | 20113<br>(13195 - 28830)    | 809.87<br>(531.33 - 1160.86) | 0.07(0.049 - 0.091)     |
| <b>Turkey</b>              | 151828<br>(97386 - 223346) | 799.22<br>(512.64 - 1175.7)  | 163762<br>(106261 - 239385) | 860.64<br>(558.44 - 1258.07) | 0.26(0.247 - 0.274)     |
| <b>Turkmenistan</b>        | 5062<br>(3231 - 7380)      | 440.64<br>(281.3 - 642.46)   | 5667<br>(3641 - 8249)       | 451.85<br>(290.29 - 657.7)   | 0.082(0.024 - 0.14)     |

|                                     |                             |                               |                             |                               |                         |
|-------------------------------------|-----------------------------|-------------------------------|-----------------------------|-------------------------------|-------------------------|
| <b>Tuvalu</b>                       | 6<br>(3 - 8)                | 227.04<br>(139.64 - 336.33)   | 8<br>(5 - 12)               | 227.61<br>(139.54 - 337)      | 0.007(-0.003 - 0.017)   |
| <b>Uganda</b>                       | 30262<br>(18627 - 44677)    | 535.29<br>(329.49 - 790.27)   | 76624<br>(47187 - 113157)   | 532.14<br>(327.71 - 785.86)   | -0.021(-0.028 - -0.015) |
| <b>Ukraine</b>                      | 48764<br>(35430 - 63810)    | 449.95<br>(326.92 - 588.78)   | 29731<br>(21654 - 38829)    | 450.47<br>(328.1 - 588.31)    | -0.001(-0.045 - 0.044)  |
| <b>United Arab Emirates</b>         | 3341<br>(2139 - 4848)       | 792.09<br>(507.02 - 1149.47)  | 8199<br>(5223 - 11904)      | 774.07<br>(493.07 - 1123.85)  | -0.076(-0.139 - -0.013) |
| <b>United Kingdom</b>               | 138137<br>(102696 - 177732) | 1167.12<br>(867.68 - 1501.66) | 132971<br>(99076 - 171943)  | 1129.19<br>(841.35 - 1460.13) | -0.115(-0.152 - -0.078) |
| <b>United Republic of Tanzania</b>  | 45312<br>(28577 - 66183)    | 532.02<br>(335.54 - 777.08)   | 98837<br>(62478 - 144354)   | 538.75<br>(340.56 - 786.86)   | 0.043(0.035 - 0.051)    |
| <b>United States of America</b>     | 426277<br>(380635 - 471483) | 773.51<br>(690.69 - 855.54)   | 491417<br>(438970 - 545706) | 760.3<br>(679.15 - 844.29)    | -0.059(-0.076 - -0.042) |
| <b>United States Virgin Islands</b> | 252<br>(160 - 370)          | 894.94<br>(568.97 - 1315.01)  | 175<br>(113 - 258)          | 915.75<br>(587.74 - 1345.34)  | 0.078(0.067 - 0.089)    |
| <b>Uruguay</b>                      | 7268<br>(4706 - 10491)      | 948.27<br>(613.98 - 1368.89)  | 7893<br>(5159 - 11369)      | 1061.88<br>(694.1 - 1529.52)  | 0.399(0.359 - 0.439)    |

|                                           |                          |                              |                           |                              |                       |
|-------------------------------------------|--------------------------|------------------------------|---------------------------|------------------------------|-----------------------|
| <b>Uzbekistan</b>                         | 28341<br>(17691 - 42056) | 443.44<br>(276.8 - 658.04)   | 41042<br>(25836 - 60601)  | 458.52<br>(288.64 - 677.03)  | 0.115(0.083 - 0.148)  |
| <b>Vanuatu</b>                            | 102<br>(63 - 152)        | 216.25<br>(132.98 - 322.21)  | 197<br>(121 - 293)        | 219.24<br>(135.24 - 327.11)  | 0.049(0.042 - 0.056)  |
| <b>Venezuela (Bolivarian Republic of)</b> | 49202<br>(31282 - 71820) | 820.77<br>(521.83 - 1198.06) | 55795<br>(35464 - 81395)  | 831.92<br>(528.78 - 1213.63) | 0.043(-0.012 - 0.098) |
| <b>Viet Nam</b>                           | 59642<br>(37508 - 88213) | 276.73<br>(174.03 - 409.29)  | 61250<br>(38823 - 89731)  | 290.43<br>(184.08 - 425.47)  | 0.167(0.131 - 0.203)  |
| <b>Yemen</b>                              | 28466<br>(18259 - 41490) | 674.12<br>(432.41 - 982.56)  | 72841<br>(46651 - 105588) | 716.7<br>(459.01 - 1038.9)   | 0.216(0.178 - 0.255)  |
| <b>Zambia</b>                             | 14803<br>(9366 - 21702)  | 533.82<br>(337.74 - 782.58)  | 33339<br>(21222 - 49042)  | 541.5<br>(344.69 - 796.55)   | 0.049(0.041 - 0.057)  |
| <b>Zimbabwe</b>                           | 17609<br>(11081 - 26124) | 490.6<br>(308.73 - 727.83)   | 24738<br>(15607 - 36516)  | 505.04<br>(318.62 - 745.49)  | 0.102(0.089 - 0.114)  |
